# Supplementary material for: Synthesis of Novel Quinazolinone Analogues for Quorum Sensing Inhibition
Source: MDPI journal article supplement (doi:10.3390/antibiotics12071227), 2023-07-24

# Synthesis of Novel Quinazolinone Analogues for Quorum Sensing Inhibition

Sahil Shandil, Tsz Tin Yu \*, Shekh Sabir, David StC. Black and Naresh Kumar \*

School of Chemistry, The University of New South Wales, Sydney, NSW 2052, Australia;  
s.shandil@unsw.edu.au (S.S.); s.sabir@student.unsw.edu.au (S.S.); d.black@unsw.edu.au (D.StC.B.)

\* Correspondence: tsztin.yu@unsw.edu.au (T.T.Y.); n.kumar@unsw.edu.au (N.K.).

## Contents

|                                                                                                                                                              |    |
|--------------------------------------------------------------------------------------------------------------------------------------------------------------|----|
| Supplementary figures for the HMBC spectrum of compound 6b .....                                                                                             | 4  |
| Supplementary scheme and table for optimization of reaction condition in the synthesis of compound 5e.....                                                   | 5  |
| Supplementary table for percentage growth inhibition of <i>P. aeruginosa</i> induced by test compounds .....                                                 | 6  |
| <sup>1</sup> H NMR and <sup>13</sup> C NMR spectra of synthesized compounds .....                                                                            | 7  |
| <i>N</i> -Butyl-2-((3-cyclopropyl-4-oxo-3,4-dihydroquinazolin-2-yl)thio)acetamide (5a) .....                                                                 | 7  |
| <i>N</i> -Benzyl-2-((3-cyclopropyl-4-oxo-3,4-dihydroquinazolin-2-yl)thio)acetamide (5b).....                                                                 | 8  |
| <i>N</i> -Benzyl-2-((4-oxo-3-phenyl-3,4-dihydroquinazolin-2-yl)thio)acetamide (5c).....                                                                      | 9  |
| <i>N</i> -Benzyl-2-((6-chloro-3-cyclopropyl-4-oxo-3,4-dihydroquinazolin-2-yl)thio)acetamide (5d)11                                                           |    |
| 2-((3-Cyclopropyl-4-oxo-3,4-dihydroquinazolin-2-yl)thio)- <i>N</i> -(4-methoxyphenyl)acetamide (5e) .....                                                    | 13 |
| <i>N</i> -(4-Methoxyphenyl)-3-((4-oxo-3-phenyl-3,4-dihydroquinazolin-2-yl)thio)propenamide (5f) .....                                                        | 14 |
| 3-Cyclopropyl-2-((2-morpholino-2-oxoethyl)thio)quinazolin-4(3 <i>H</i> )-one (5g) .....                                                                      | 16 |
| 2-((2-Morpholino-2-oxoethyl)thio)-3-phenylquinazolin-4(3 <i>H</i> )-one (5h) 17                                                                              |    |
| 2-((2-Morpholino-2-oxoethyl)thio)quinazolin-4(3 <i>H</i> )-one (5i).....                                                                                     | 18 |
| <i>N</i> -(4-Methoxyphenyl)-2-((4-oxo-3-phenyl-3,4-dihydroquinazolin-2-yl)thio)acetamide (5j) .....                                                          | 19 |
| 2-((6-Chloro-3-cyclopropyl-4-oxo-3,4-dihydroquinazolin-2-yl)thio)- <i>N</i> -(4-methoxyphenyl)acetamide (5k) .....                                           | 20 |
| 2-(4-(((3-Cyclopropyl-4-oxo-3,4-dihydroquinazolin-2-yl)thio)methyl)-1 <i>H</i> -1,2,3-triazol-1-yl)- <i>N</i> -phenylacetamide (6a) .....                    | 21 |
| 2-(4-(((3-Cyclopropyl-4-oxo-3,4-dihydroquinazolin-2-yl)thio)methyl)-1 <i>H</i> -1,2,3-triazol-1-yl)- <i>N</i> -(4-methoxyphenyl)acetamide (6b) .....         | 22 |
| 2-(4-(((6-Chloro-3-cyclopropyl-4-oxo-3,4-dihydroquinazolin-2-yl)thio)methyl)-1 <i>H</i> -1,2,3-triazol-1-yl)- <i>N</i> -(4-methoxyphenyl)acetamide (6c)..... | 23 |
| <i>N</i> -(4-Methoxyphenyl)-2-(4-(((4-oxo-3-phenyl-3,4-dihydroquinazolin-2-yl)thio)methyl)-1 <i>H</i> -1,2,3-triazol-1-yl)acetamide (6d) .....               | 24 |
| 2-(4-(((3-Cyclopropyl-4-oxo-3,4-dihydroquinazolin-2-yl)thio)methyl)-1 <i>H</i> -1,2,3-triazol-1-yl)- <i>N</i> -(4-nitrophenyl)acetamide (6e) .....           | 25 |
| 3-Cyclopropyl-2-mercaptoquinazolin-4(3 <i>H</i> )-one (8a) .....                                                                                             | 26 |
| 2-Mercapto-3-phenylquinazolin-4(3 <i>H</i> )-one (8b) .....                                                                                                  | 27 |

**Citation:** Shandil, S.; Yu, T.T.; Sabir, S.; Black, D.StC.; Kumar, N. Synthesis of Novel Quinazolinone Analogues for Quorum Sensing Inhibition. *Antibiotics* **2023**, *12*, x. <https://doi.org/10.3390/xxxxx>

Academic Editor(s): Rok Frlan

Received: 15 June 2023

Revised: 17 July 2023

Accepted: 21 July 2023

Published: date

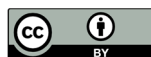

**Copyright:** © 2023 by the authors. Submitted for possible open access publication under the terms and conditions of the Creative Commons Attribution (CC BY) license (<https://creativecommons.org/licenses/by/4.0/>).

|                                                                                                                                                                       |    |
|-----------------------------------------------------------------------------------------------------------------------------------------------------------------------|----|
| 6-Chloro-3-cyclopropyl-2-mercaptoquinazolin-4(3 <i>H</i> )-one ( <b>8c</b> ).....                                                                                     | 28 |
| 2-((3-Cyclopropyl-4-oxo-3,4-dihydroquinazolin-2-yl)thio)acetic acid ( <b>9a</b> ) .....                                                                               | 29 |
| 2-((4-Oxo-3-phenyl-3,4-dihydroquinazolin-2-yl)thio)acetic acid ( <b>9b</b> ).....                                                                                     | 30 |
| 2-((6-Chloro-3-cyclopropyl-4-oxo-3,4-dihydroquinazolin-2-yl)thio)acetic acid ( <b>9c</b> ).....                                                                       | 31 |
| 3-((4-Oxo-3-phenyl-3,4-dihydroquinazolin-2-yl)thio)propanoic acid ( <b>9d</b> ).....                                                                                  | 33 |
| 2-Chloro- <i>N</i> -(4-methoxyphenyl)acetamide ( <b>12</b> ).....                                                                                                     | 34 |
| 3-Cyclopropyl-2-(prop-2-yn-1-ylthio)quinazolin-4(3 <i>H</i> )-one ( <b>13a</b> ) .....                                                                                | 35 |
| 3-Phenyl-2-(prop-2-yn-1-ylthio)quinazolin-4(3 <i>H</i> )-one ( <b>13b</b> ).....                                                                                      | 37 |
| 6-Chloro-3-cyclopropyl-2-(prop-2-yn-1-ylthio)quinazolin-4(3 <i>H</i> )-one ( <b>13c</b> ).....                                                                        | 39 |
| 2-Bromo- <i>N</i> -(4-methoxyphenyl)acetamide ( <b>15a</b> ).....                                                                                                     | 41 |
| 2-Bromo- <i>N</i> -phenylacetamide ( <b>15b</b> ) .....                                                                                                               | 42 |
| 2-Bromo- <i>N</i> -(4-nitrophenyl)acetamide ( <b>15c</b> ) .....                                                                                                      | 44 |
| High resolution mass spectra (HRMS) of synthesised compounds .....                                                                                                    | 45 |
| <i>N</i> -Butyl-2-((3-cyclopropyl-4-oxo-3,4-dihydroquinazolin-2-yl)thio)acetamide ( <b>5a</b> ) .....                                                                 | 45 |
| <i>N</i> -Benzyl-2-((3-cyclopropyl-4-oxo-3,4-dihydroquinazolin-2-yl)thio)acetamide ( <b>5b</b> ).....                                                                 | 47 |
| <i>N</i> -Benzyl-2-((4-oxo-3-phenyl-3,4-dihydroquinazolin-2-yl)thio)acetamide ( <b>5c</b> ).....                                                                      | 49 |
| <i>N</i> -Benzyl-2-((6-chloro-3-cyclopropyl-4-oxo-3,4-dihydroquinazolin-2-yl)thio)acetamide ( <b>5d</b> )                                                             | 51 |
| <i>N</i> -(4-Methoxyphenyl)-3-((4-oxo-3-phenyl-3,4-dihydroquinazolin-2-yl)thio)propenamide ( <b>5f</b> )                                                              | 53 |
| 3-Cyclopropyl-2-((2-morpholino-2-oxoethyl)thio)quinazolin-4(3 <i>H</i> )-one ( <b>5g</b> ) .....                                                                      | 55 |
| 2-((2-Morpholino-2-oxoethyl)thio)-3-phenylquinazolin-4(3 <i>H</i> )-one ( <b>5h</b> ) .....                                                                           | 57 |
| 2-((2-Morpholino-2-oxoethyl)thio)quinazolin-4(3 <i>H</i> )-one ( <b>5i</b> ) .....                                                                                    | 59 |
| <i>N</i> -(4-Methoxyphenyl)-2-((4-oxo-3-phenyl-3,4-dihydroquinazolin-2-yl)thio)acetamide ( <b>5j</b> )                                                                | 61 |
| 2-((6-Chloro-3-cyclopropyl-4-oxo-3,4-dihydroquinazolin-2-yl)thio)- <i>N</i> -(4-methoxyphenyl)acetamide ( <b>5k</b> ) .....                                           | 63 |
| 2-(4-(((3-Cyclopropyl-4-oxo-3,4-dihydroquinazolin-2-yl)thio)methyl)-1 <i>H</i> -1,2,3-triazol-1-yl)- <i>N</i> -phenylacetamide ( <b>6a</b> ) .....                    | 65 |
| 2-(4-(((3-Cyclopropyl-4-oxo-3,4-dihydroquinazolin-2-yl)thio)methyl)-1 <i>H</i> -1,2,3-triazol-1-yl)- <i>N</i> -(4-methoxyphenyl)acetamide ( <b>6b</b> ).....          | 67 |
| 2-(4-(((6-Chloro-3-cyclopropyl-4-oxo-3,4-dihydroquinazolin-2-yl)thio)methyl)-1 <i>H</i> -1,2,3-triazol-1-yl)- <i>N</i> -(4-methoxyphenyl)acetamide ( <b>6c</b> )..... | 69 |
| <i>N</i> -(4-Methoxyphenyl)-2-(4-(((4-oxo-3-phenyl-3,4-dihydroquinazolin-2-yl)thio)methyl)-1 <i>H</i> -1,2,3-triazol-1-yl)acetamide ( <b>6d</b> ) .....               | 71 |
| 2-(4-(((3-Cyclopropyl-4-oxo-3,4-dihydroquinazolin-2-yl)thio)methyl)-1 <i>H</i> -1,2,3-triazol-1-yl)- <i>N</i> -(4-nitrophenyl)acetamide ( <b>6e</b> ) .....           | 73 |
| 3-Cyclopropyl-2-mercaptoquinazolin-4(3 <i>H</i> )-one ( <b>8a</b> ) .....                                                                                             | 75 |
| 2-Mercapto-3-phenylquinazolin-4(3 <i>H</i> )-one ( <b>8b</b> ) .....                                                                                                  | 77 |
| 6-Chloro-3-cyclopropyl-2-mercaptoquinazolin-4(3 <i>H</i> )-one ( <b>8c</b> ).....                                                                                     | 78 |
| 2-((3-Cyclopropyl-4-oxo-3,4-dihydroquinazolin-2-yl)thio)acetic acid ( <b>9a</b> ) .....                                                                               | 80 |
| 2-((4-Oxo-3-phenyl-3,4-dihydroquinazolin-2-yl)thio)acetic acid ( <b>9b</b> ).....                                                                                     | 82 |
| 2-((6-Chloro-3-cyclopropyl-4-oxo-3,4-dihydroquinazolin-2-yl)thio)acetic acid ( <b>9c</b> ).....                                                                       | 84 |
| 3-((4-Oxo-3-phenyl-3,4-dihydroquinazolin-2-yl)thio)propanoic acid ( <b>9d</b> ).....                                                                                  | 86 |
| 2-Chloro- <i>N</i> -(4-methoxyphenyl)acetamide ( <b>12</b> ).....                                                                                                     | 87 |
| 3-Cyclopropyl-2-(prop-2-yn-1-ylthio)quinazolin-4(3 <i>H</i> )-one ( <b>13a</b> ) .....                                                                                | 89 |

|                                                                                                |    |
|------------------------------------------------------------------------------------------------|----|
| 3-Phenyl-2-(prop-2-yn-1-ylthio)quinazolin-4(3 <i>H</i> )-one ( <b>13b</b> ).....               | 91 |
| 6-Chloro-3-cyclopropyl-2-(prop-2-yn-1-ylthio)quinazolin-4(3 <i>H</i> )-one ( <b>13c</b> )..... | 93 |
| 2-Bromo- <i>N</i> -(4-methoxyphenyl)acetamide ( <b>15a</b> ).....                              | 95 |
| 2-Bromo- <i>N</i> -phenylacetamide ( <b>15b</b> ).....                                         | 97 |
| 2-Bromo- <i>N</i> -(4-nitrophenyl)acetamide ( <b>15c</b> ).....                                | 99 |

## Supplementary figures for the HMBC spectrum of compound 6b

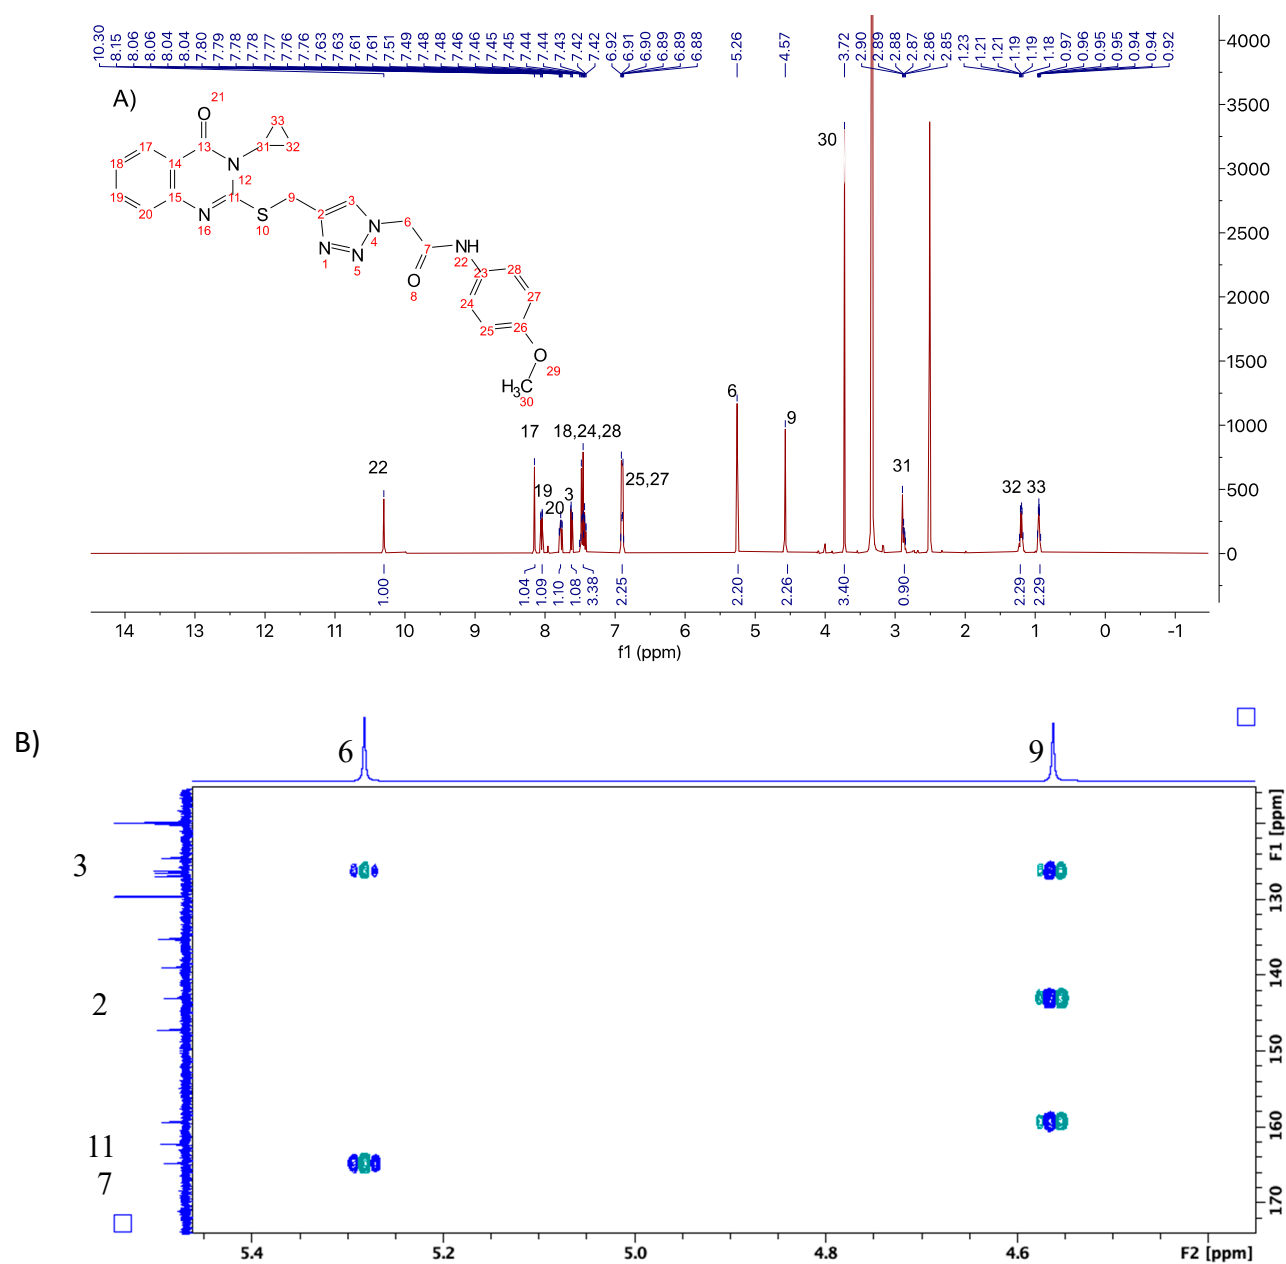

**Figure S1.** (A)  $^1\text{H}$  NMR spectrum of compound **6b**. (B) Key  $^1\text{H}$ : $^{13}\text{C}$  HMBC correlations in compound **6b**.



**Supplementary scheme and table for optimization of reaction condition in the synthesis of compound 5e**

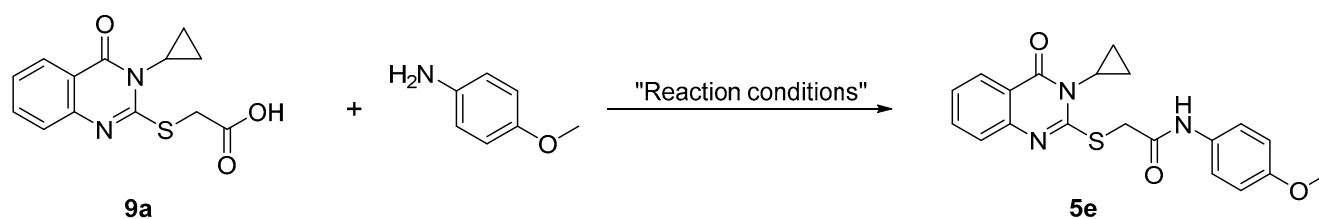

**Scheme S1.** Synthesis of quinazolinone-based amide **5e**.

**Table S1:** Reaction conditions attempted for the synthesis of quinazolinone-based amide **5a**.

| Entry | Reagents                              | Solvents      | Reaction temperature | Reaction time (h) | Yield (%) |
|-------|---------------------------------------|---------------|----------------------|-------------------|-----------|
| 1     | SOCl <sub>2</sub> , Et <sub>3</sub> N | DCM           | Reflux               | 1                 | 5         |
| 2     | EDC-HCl, DIPEA                        | ACN:DMF (1:1) | r.t.                 | 12                | 4         |
| 3     | EDC-HCl, DIPEA                        | ACN:DMF (1:1) | 50 °C                | 12                | 4         |
| 4     | DCC, DMAP                             | DCM           | r.t.                 | 18                | 2         |
| 5     | HATU, Et <sub>3</sub> N               | DMF           | r.t.                 | 12                | 64        |

## Supplementary table for percentage growth inhibition of *P. aeruginosa* induced by test compounds

**Table S2:** Percentage growth inhibition of *P. aeruginosa* induced by test compounds at 100, 50 and 25  $\mu\text{M}$ . (All measurements were performed in triplicate with  $\pm$  standard deviation from mean.)

| Compound | Concentration     |                  |                  |
|----------|-------------------|------------------|------------------|
|          | 100 $\mu\text{M}$ | 50 $\mu\text{M}$ | 25 $\mu\text{M}$ |
| 5a       | 0                 | 0                | 0                |
| 5b       | 0                 | 0                | 0                |
| 5c       | 0                 | 0                | 0                |
| 5d       | 10.4 $\pm$ 4.1    | 4.5 $\pm$ 1.8    | 8.9 $\pm$ 3.7    |
| 5e       | 0                 | 0                | 0                |
| 5f       | 0.5 $\pm$ 0.7     | 0                | 0                |
| 5g       | 0                 | 0.4 $\pm$ 2.1    | 3.1 $\pm$ 2.1    |
| 5h       | 0                 | 0                | 0                |
| 5i       | 1.2 $\pm$ 4.1     | 0.2 $\pm$ 2.0    | 0.2 $\pm$ 3.1    |
| 5j       | 16.8 $\pm$ 2.3    | 7.9 $\pm$ 8.2    | 5.8 $\pm$ 3.0    |
| 5k       | 0                 | 0                | 0                |
| 6a       | NT                | NT               | 0                |
| 6b       | 0                 | 1.0 $\pm$ 7.6    | 1.0 $\pm$ 2.4    |
| 6c       | 0                 | 0.4 $\pm$ 8.4    | 0                |
| 6d       | 7.2 $\pm$ 6.2     | 3.6 $\pm$ 3.6    | 0                |
| 6e       | 10.9 $\pm$ 4.7    | 0                | 0                |

0 = no growth inhibition; NT = Not tested

# $^1\text{H}$ NMR and $^{13}\text{C}$ NMR spectra of synthesized compounds

*N*-Butyl-2-((3-cyclopropyl-4-oxo-3,4-dihydroquinazolin-2-yl)thio)acetamide (5a)

$^1\text{H}$  NMR (400 MHz,  $\text{DMSO}-d_6$ ):

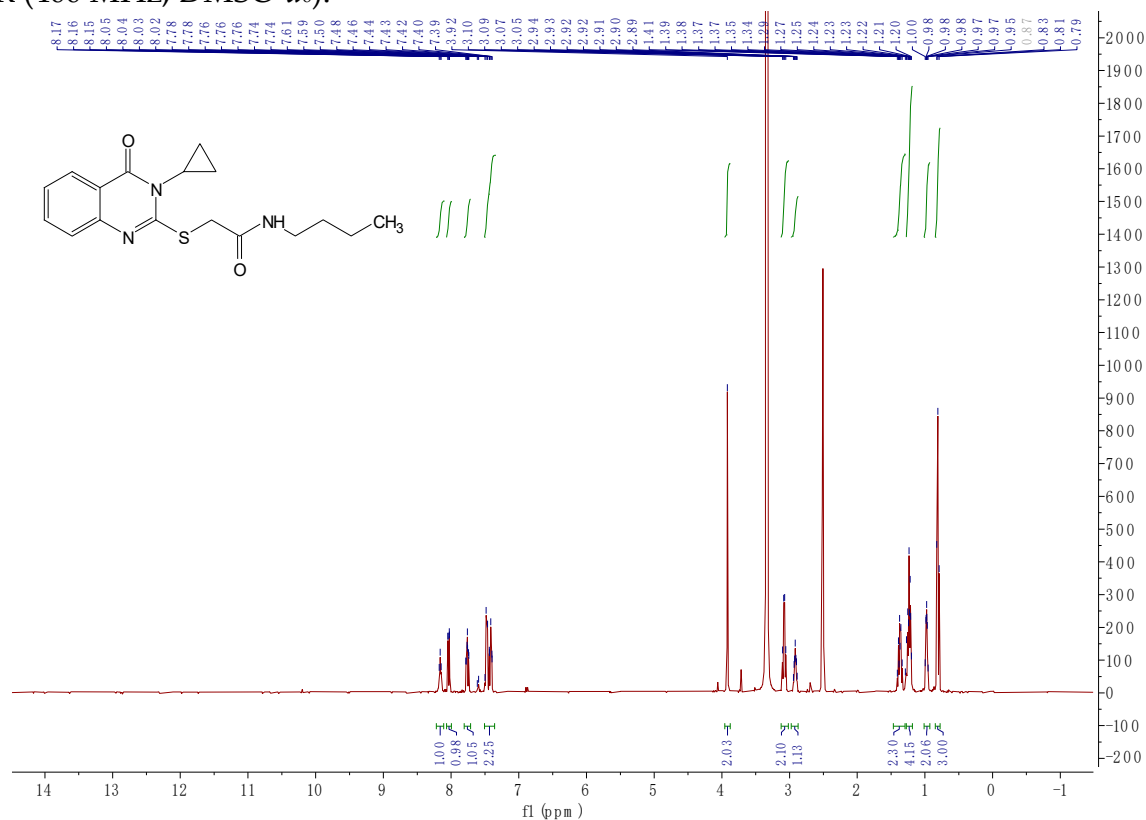

*N*-Benzyl-2-((3-cyclopropyl-4-oxo-3,4-dihydroquinazolin-2-yl)thio)acetamide (**5b**)

$^1\text{H}$  NMR (400 MHz,  $\text{DMSO}-d_6$ ):

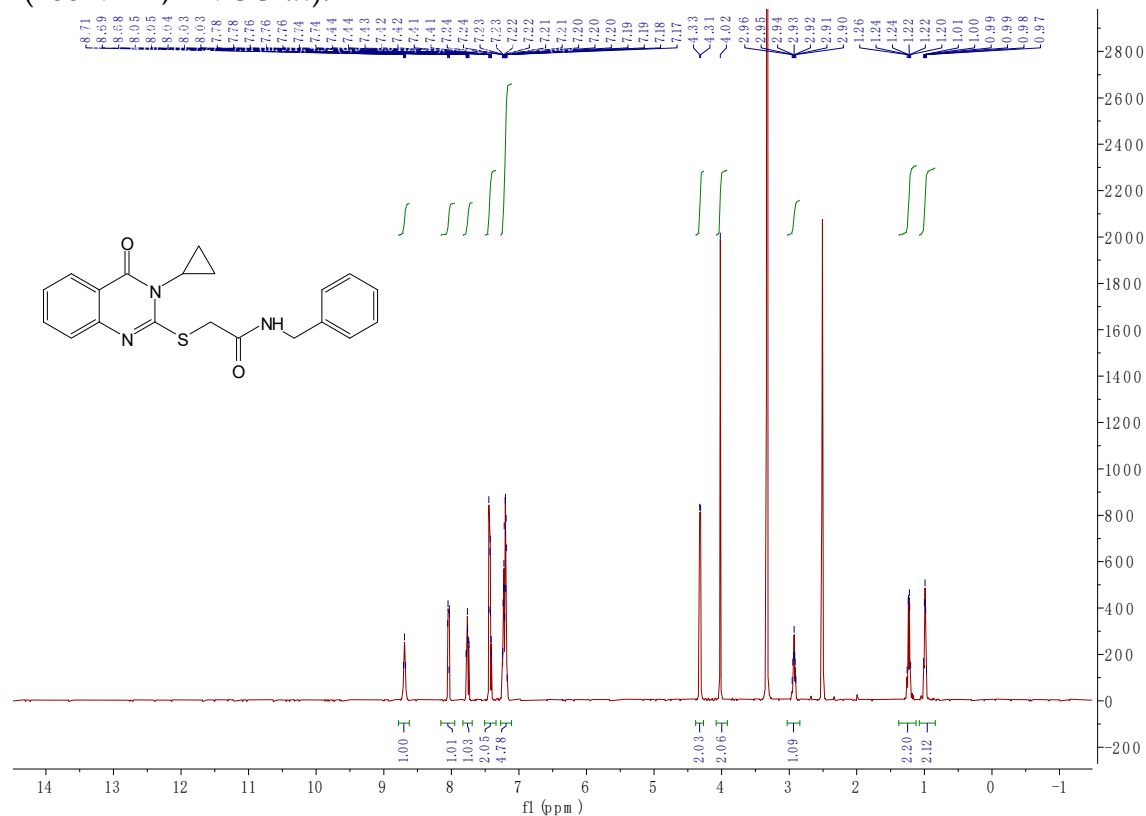

$^{13}\text{C}$  NMR (100 MHz,  $\text{DMSO}-d_6$ ):

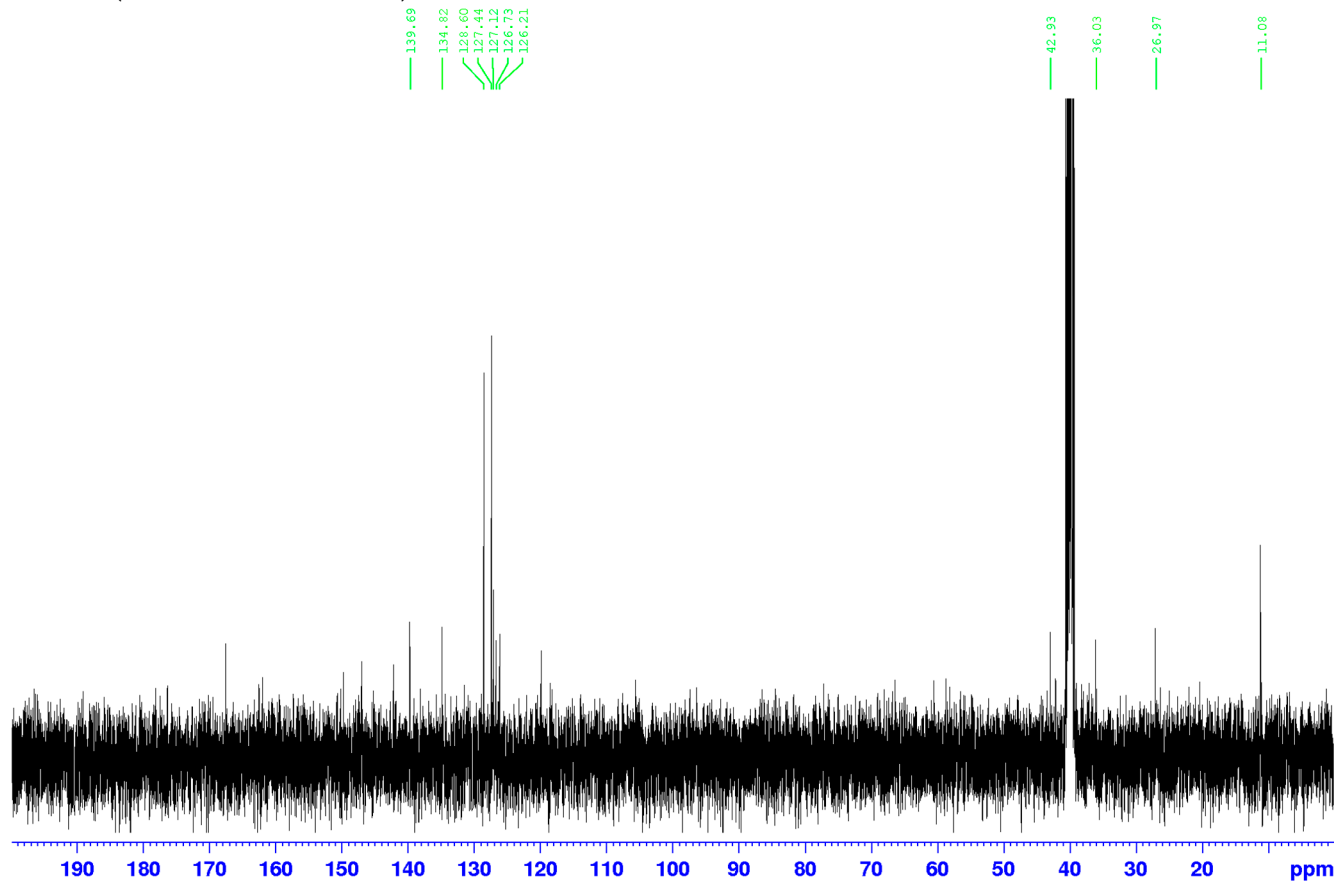

*N*-Benzyl-2-((4-oxo-3-phenyl-3,4-dihydroquinazolin-2-yl)thio)acetamide  
(5c)

$^1\text{H}$  NMR (400 MHz,  $\text{DMSO}-d_6$ ):

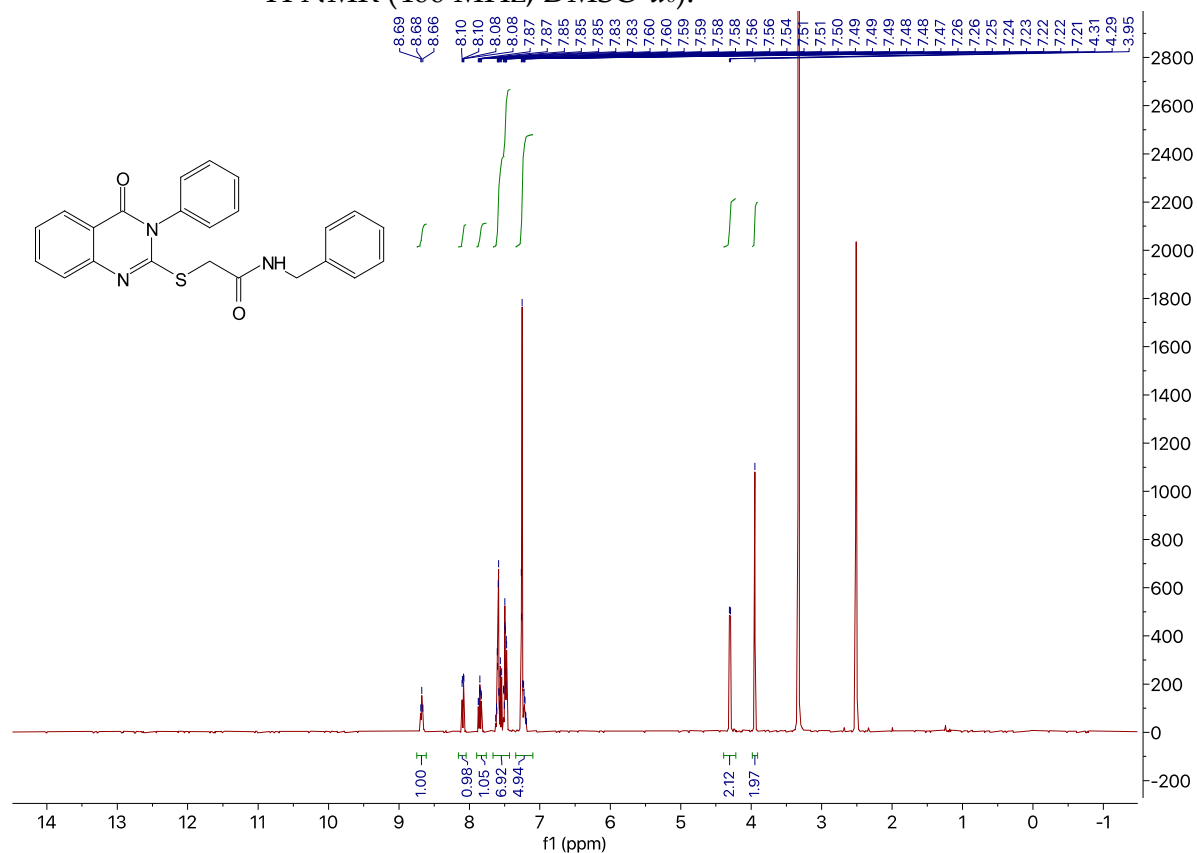

$^{13}\text{C}$  NMR (100 MHz,  $\text{DMSO}-d_6$ ):

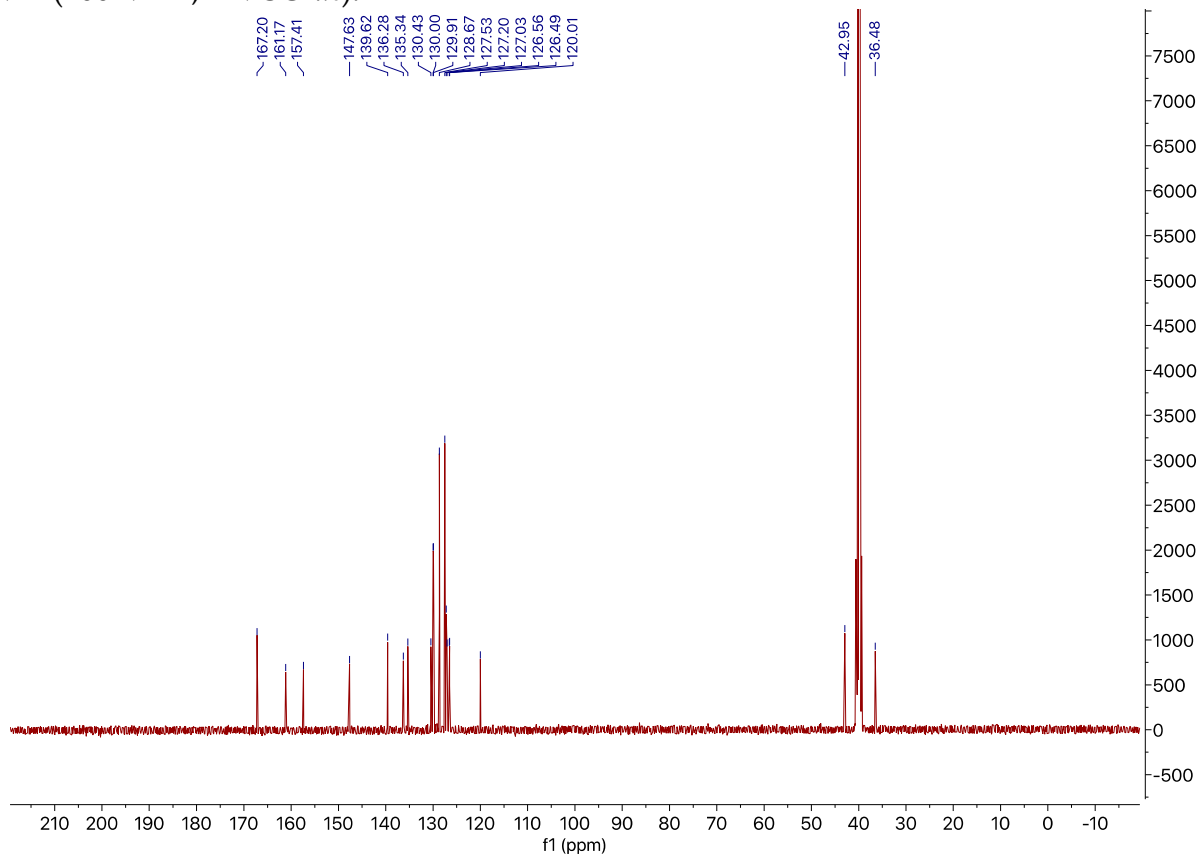



N-Benzyl-2-((6-chloro-3-cyclopropyl-4-oxo-3,4-dihydroquinazolin-2-yl)thio)acetamide (**5d**)

$^1\text{H}$  NMR (400 MHz,  $\text{DMSO}-d_6$ ):

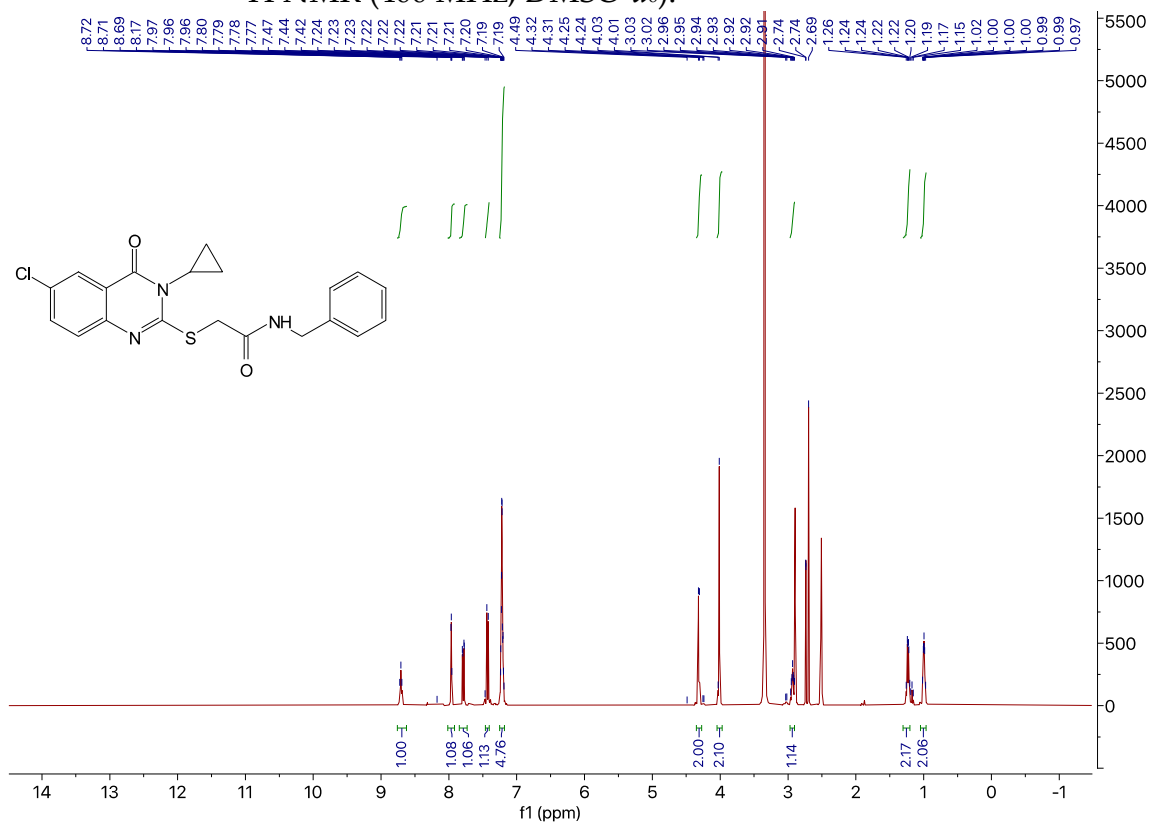

$^{13}\text{C}$  NMR (100 MHz,  $\text{DMSO}-d_6$ ):

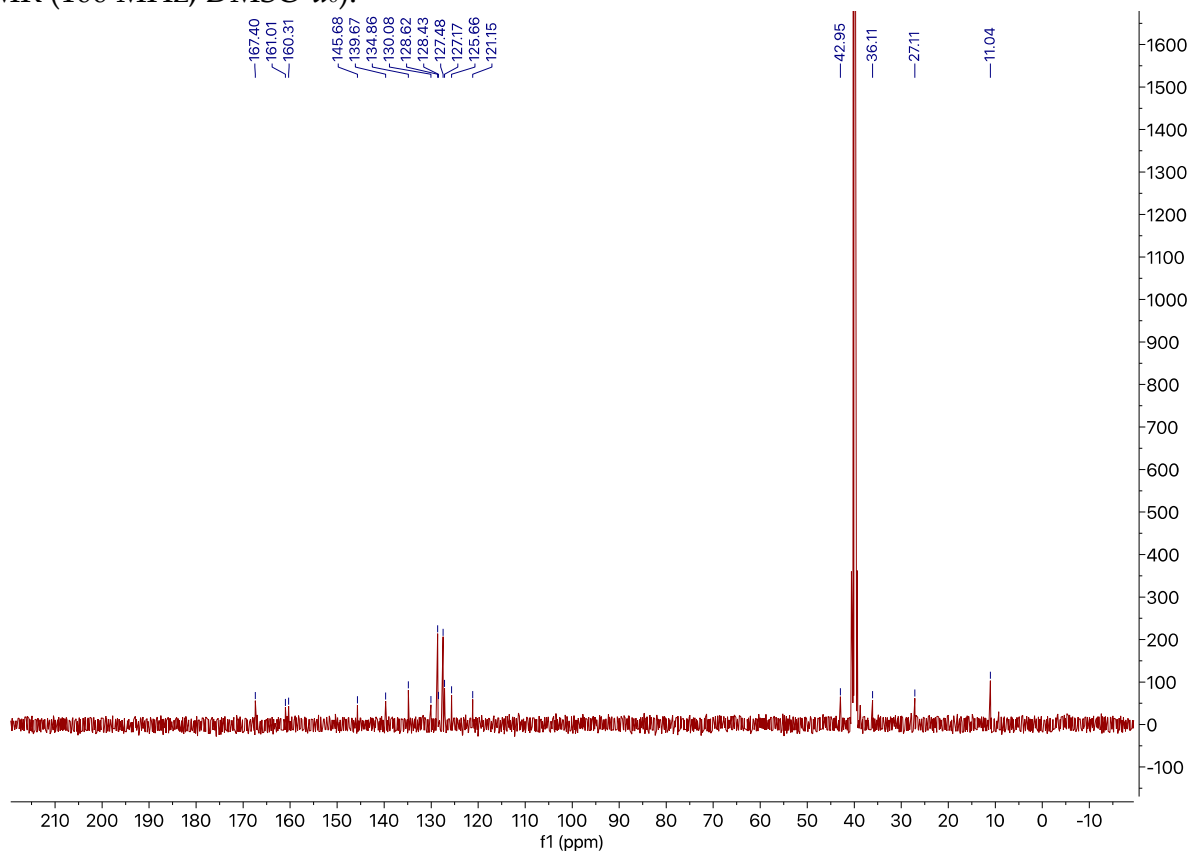





2-((3-Cyclopropyl-4-oxo-3,4-dihydroquinazolin-2-yl)thio)-N-(4-methoxyphenyl)acetamide (**5e**)

$^1\text{H}$  NMR (400 MHz,  $\text{DMSO}-d_6$ ):

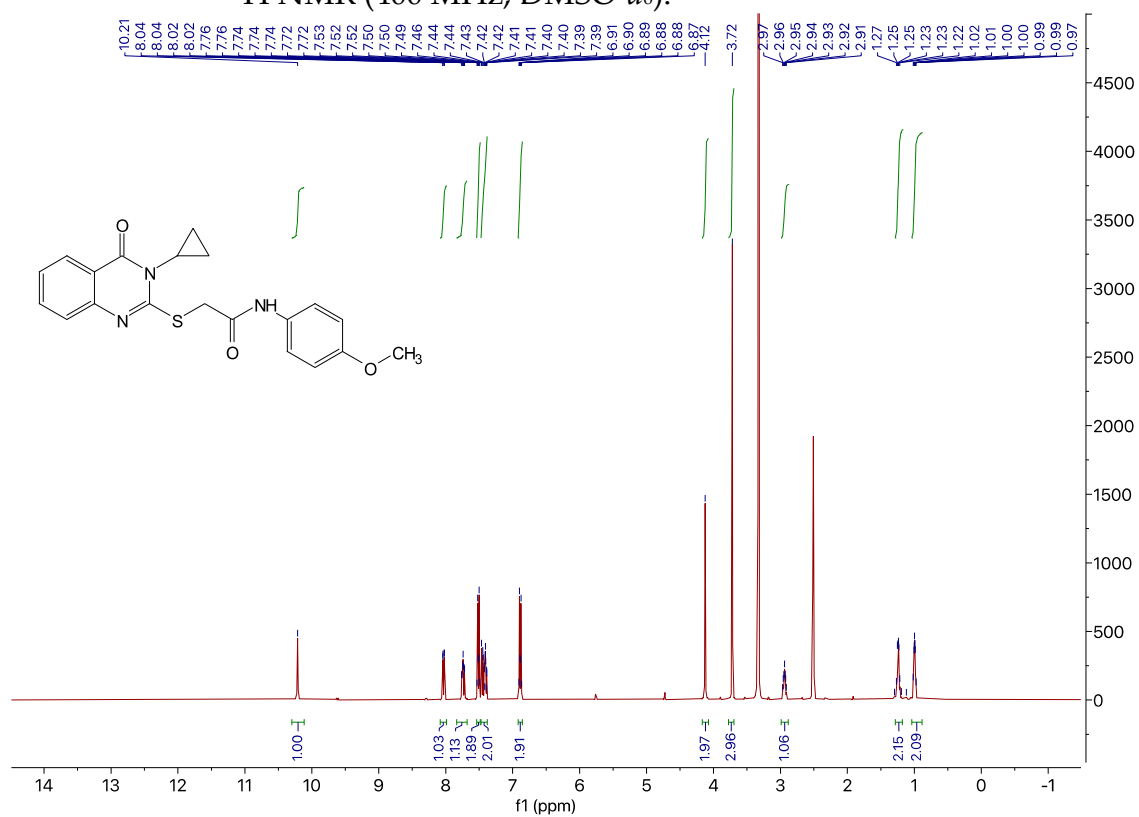

$^{13}\text{C}$  NMR (100 MHz,  $\text{DMSO}-d_6$ ):

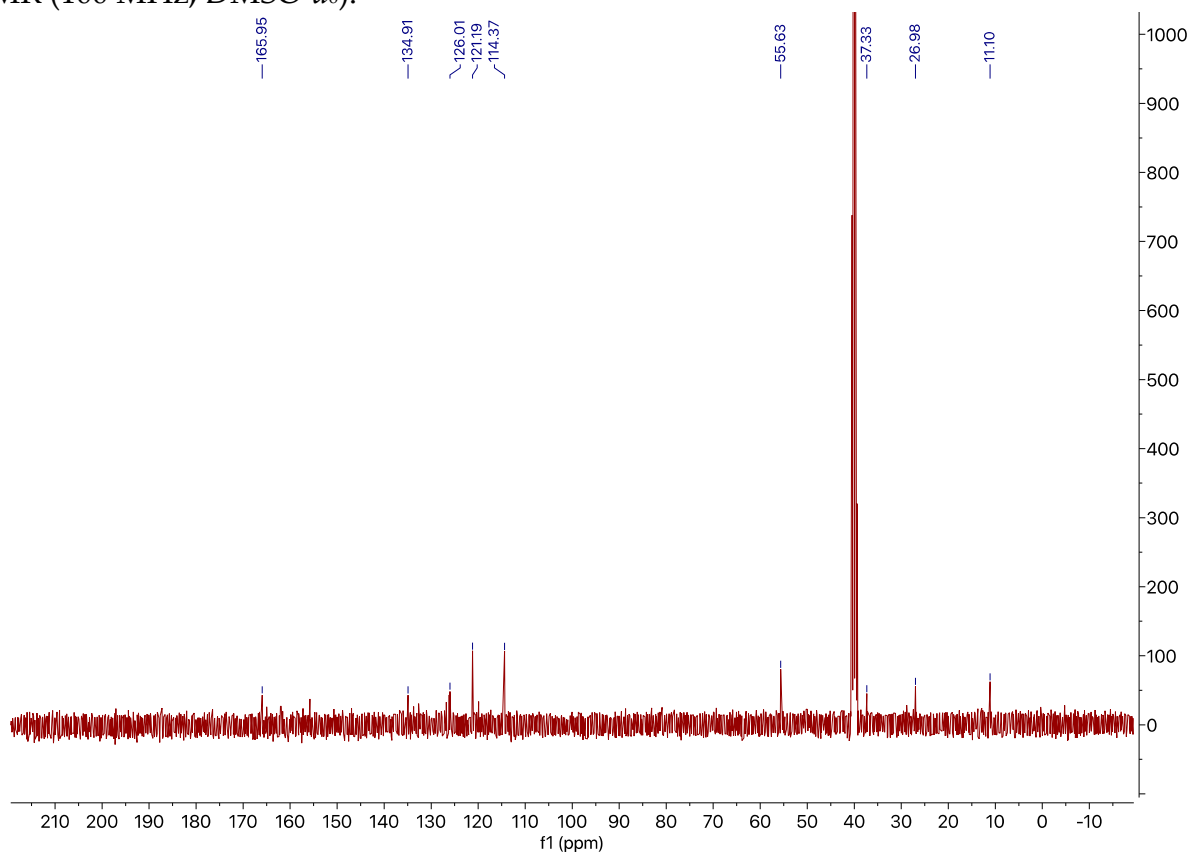

N-(4-Methoxyphenyl)-3-((4-oxo-3-phenyl-3,4-dihydroquinazolin-2-yl)thio)propanamide (**5f**)

$^1\text{H}$  NMR (400 MHz,  $\text{DMSO}-d_6$ ):

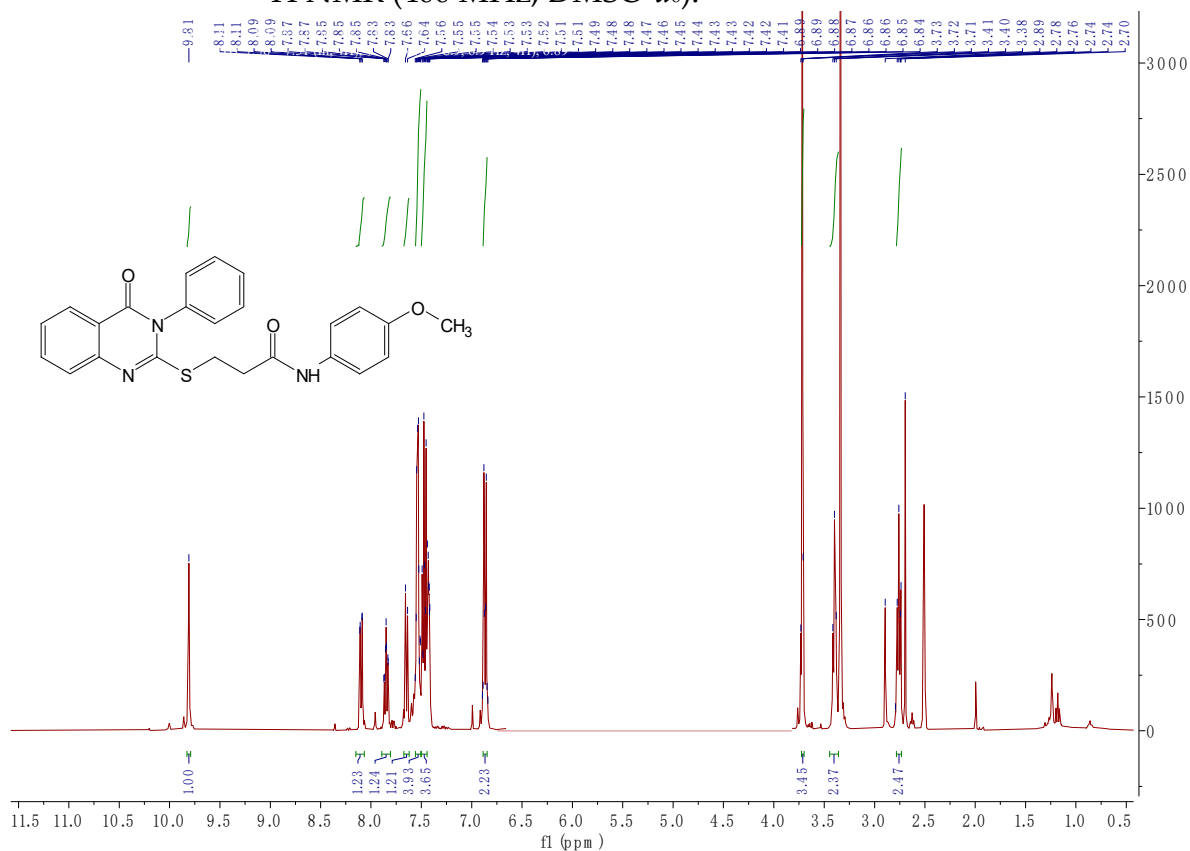

$^{13}\text{C}$  NMR (100 MHz,  $\text{DMSO}-d_6$ ):

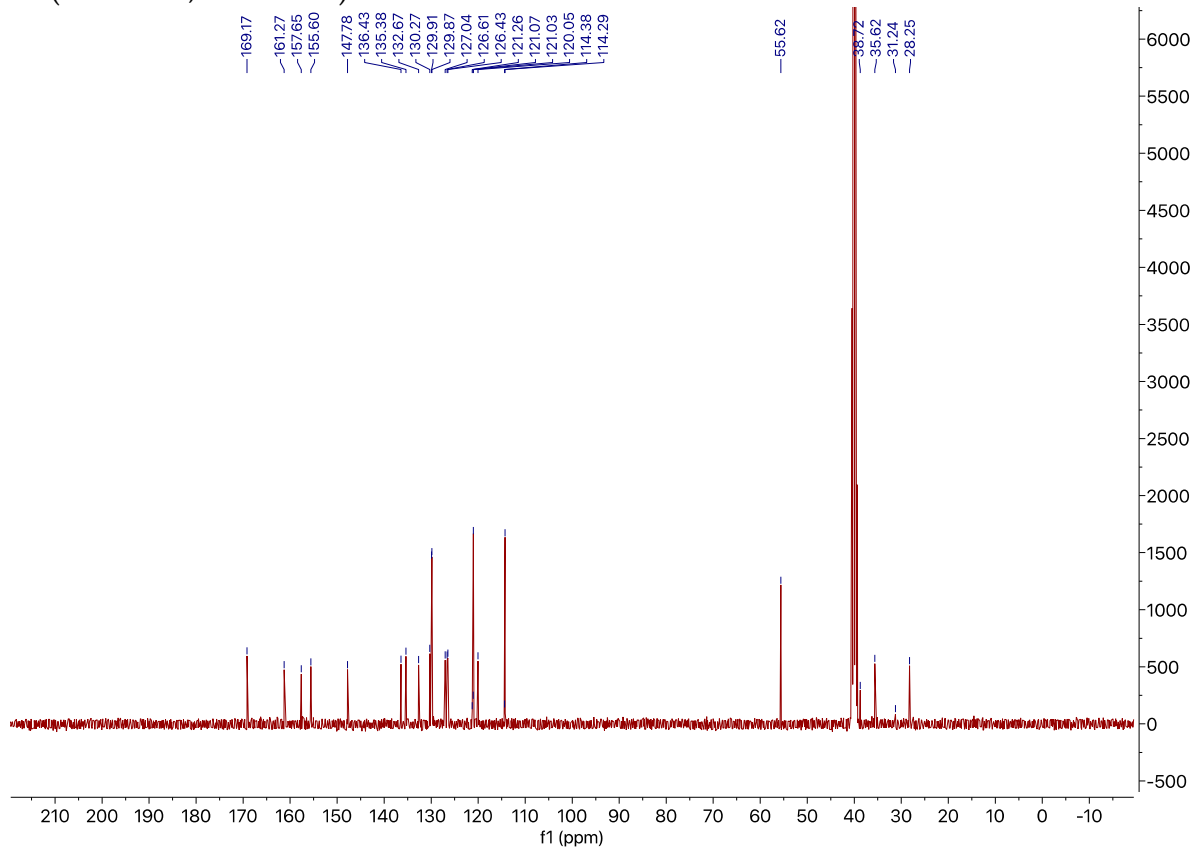



### 3-Cyclopropyl-2-((2-morpholino-2-oxoethyl)thio)quinazolin-4(3H)-one (**5g**)

$^1\text{H}$  NMR (400 MHz,  $\text{DMSO}-d_6$ ):

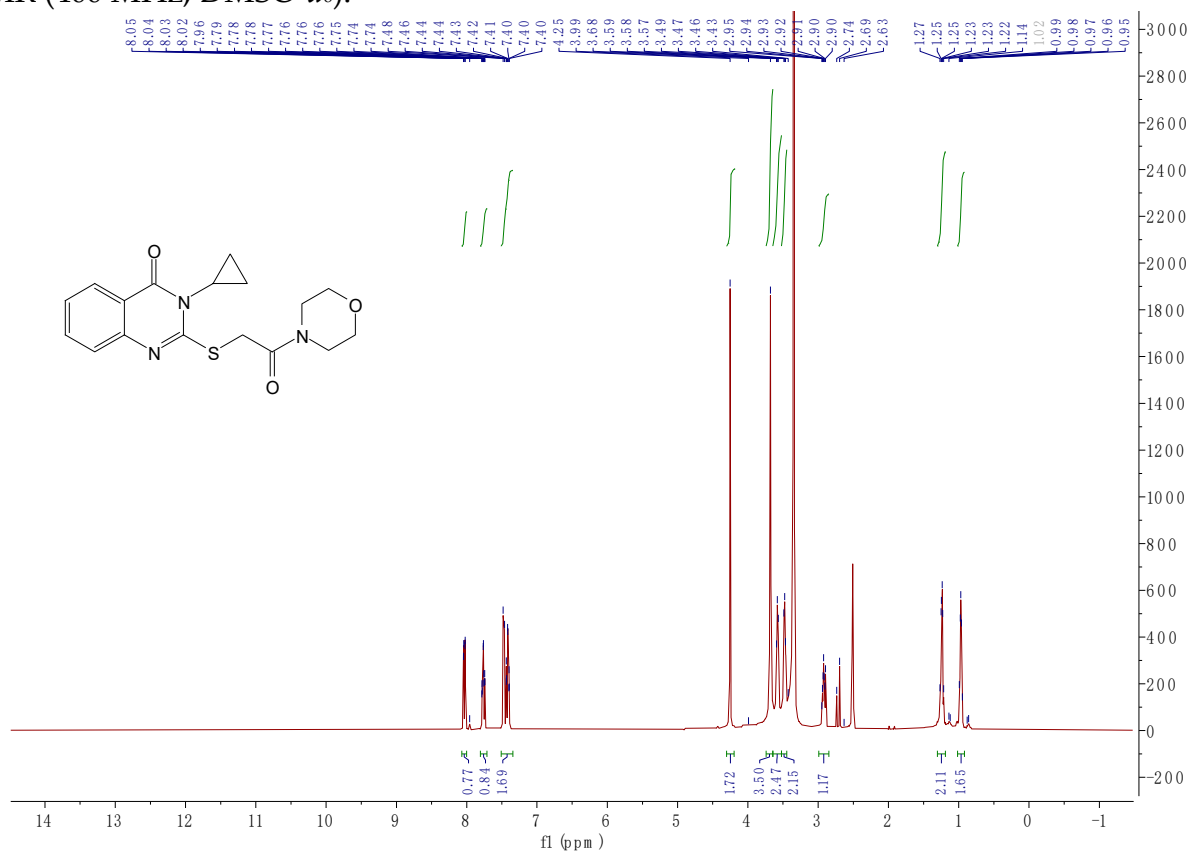

$^{13}\text{C}$  NMR (100 MHz,  $\text{DMSO}-d_6$ ):

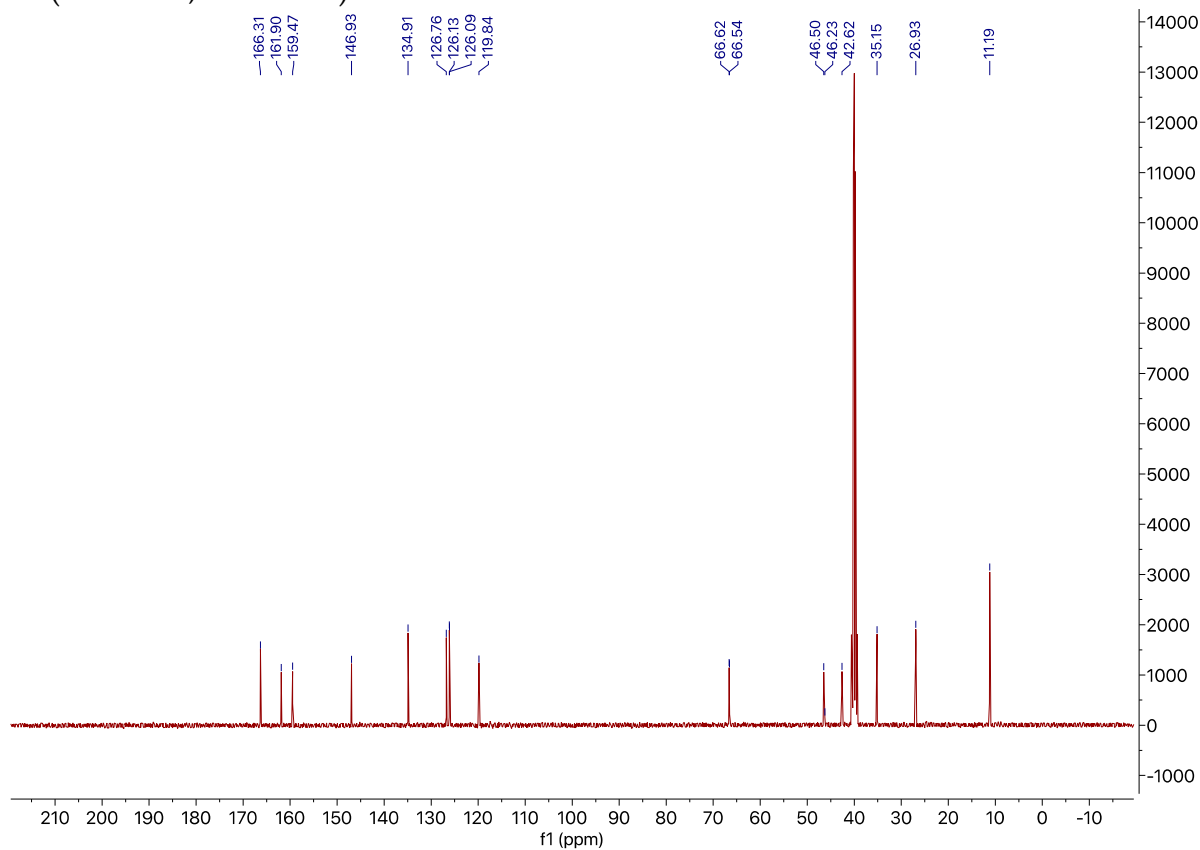

2-((2-Morpholino-2-oxoethyl)thio)-3-phenylquinazolin-4(3H)-one (**5h**)

$^1\text{H}$  NMR (400 MHz,  $\text{DMSO}-d_6$ ):

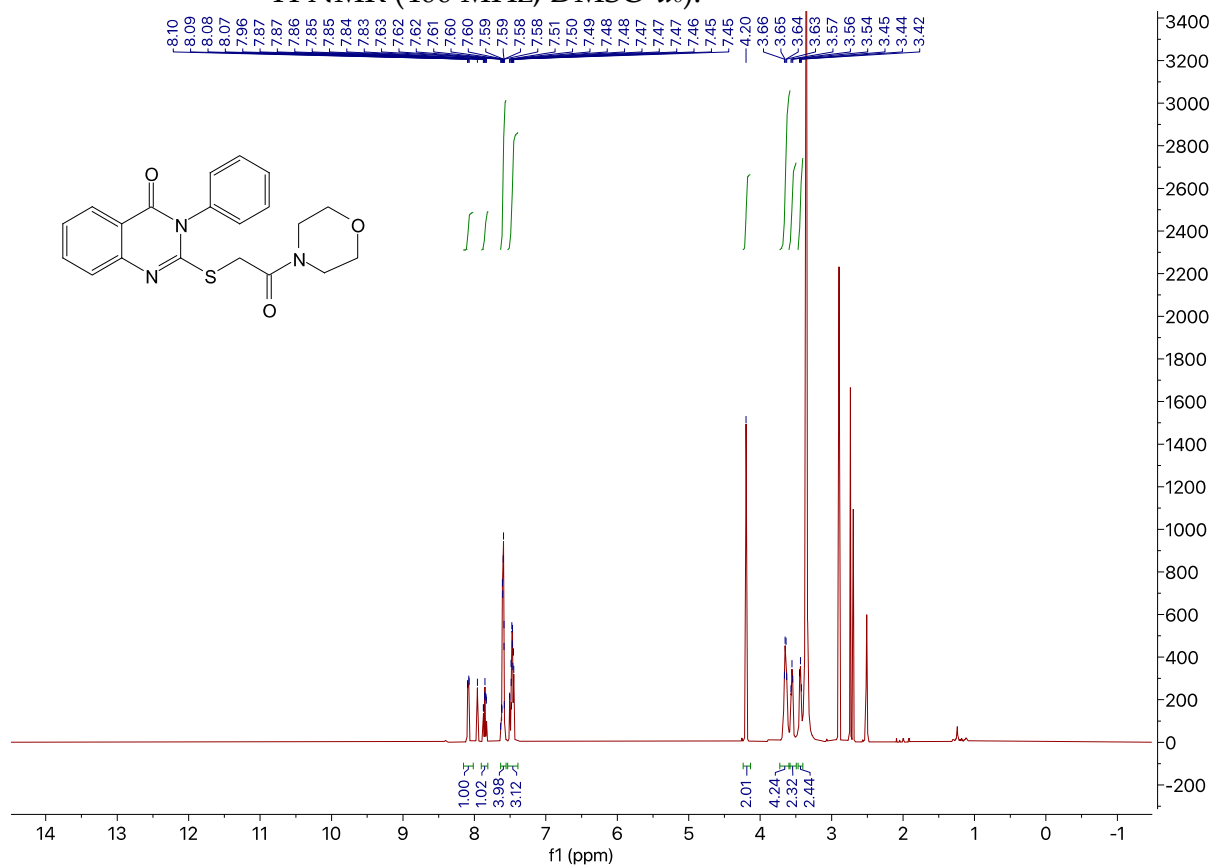

$^{13}\text{C}$  NMR (100 MHz,  $\text{DMSO}-d_6$ ):

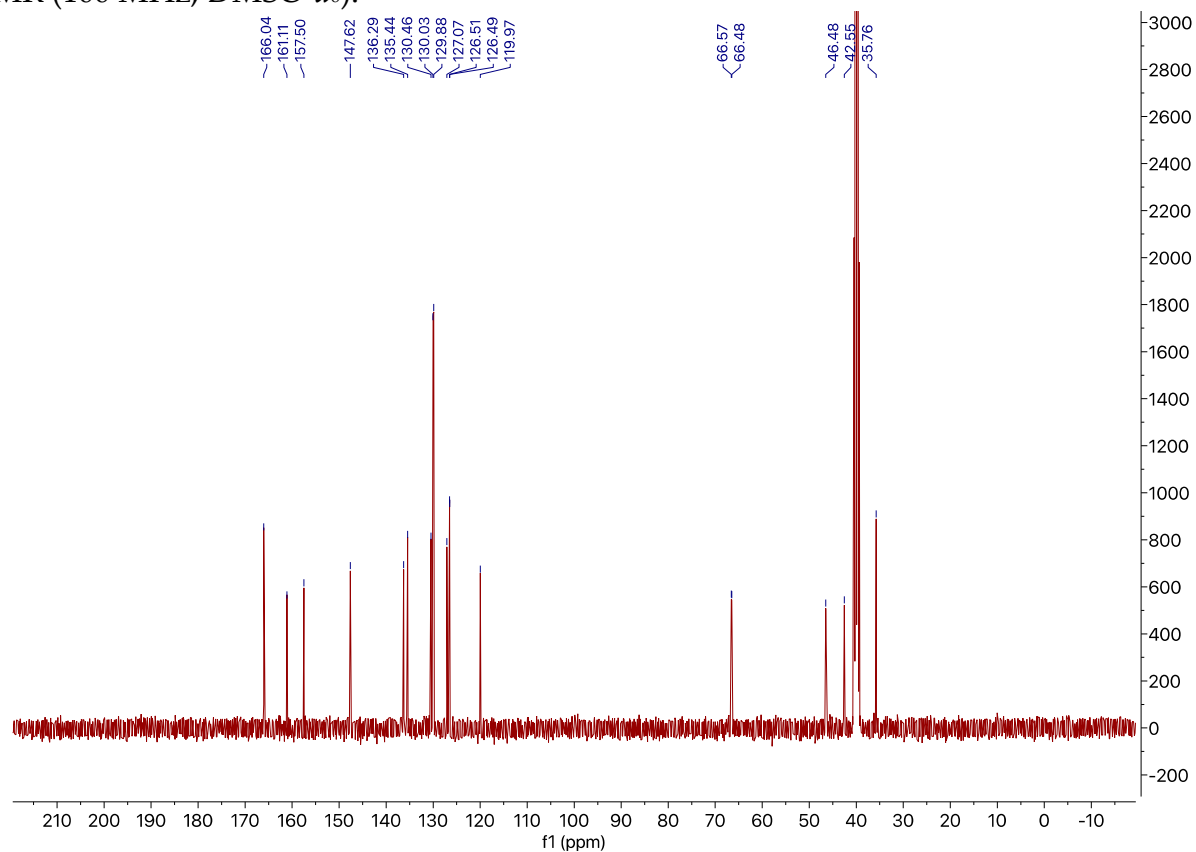

2-((2-Morpholino-2-oxoethyl)thio)quinazolin-4(3H)-one (**5i**)

$^1\text{H}$  NMR (400 MHz,  $\text{DMSO}-d_6$ ):

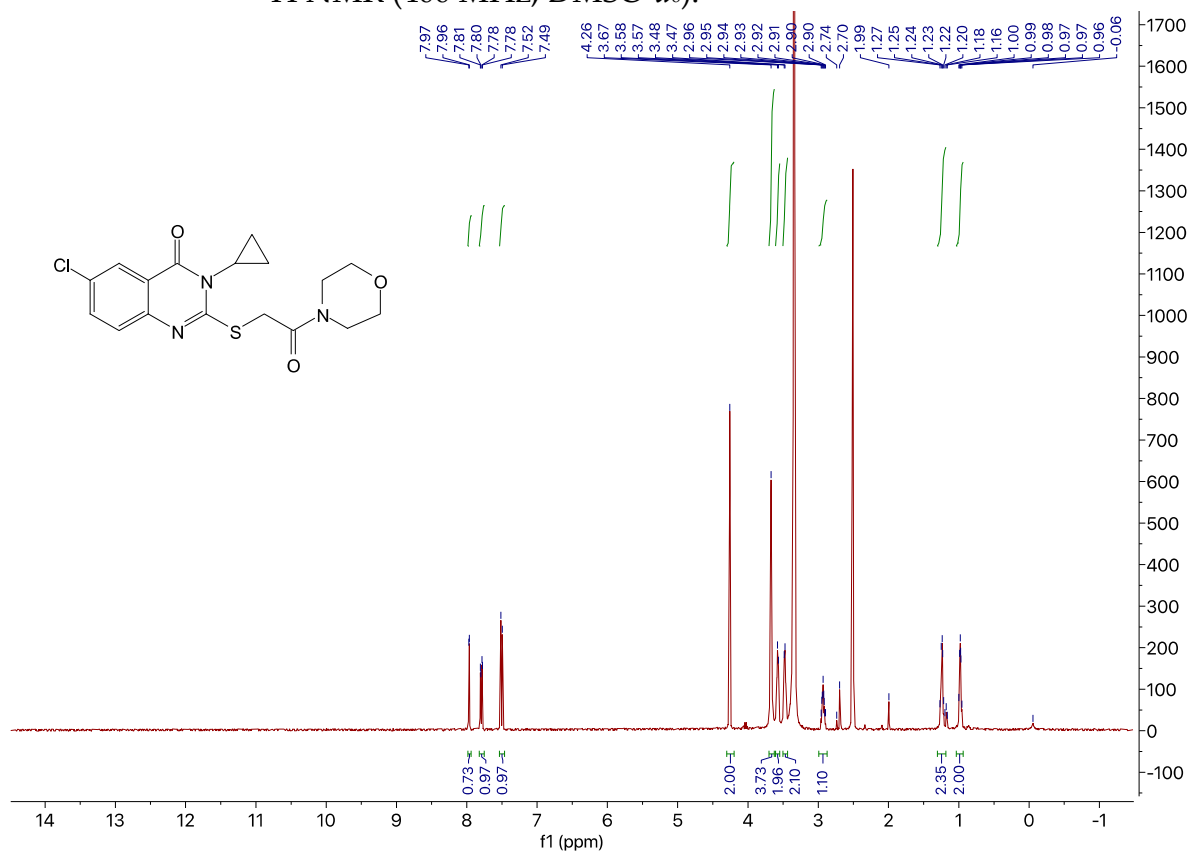

$^{13}\text{C}$  NMR (100 MHz,  $\text{DMSO}-d_6$ ):

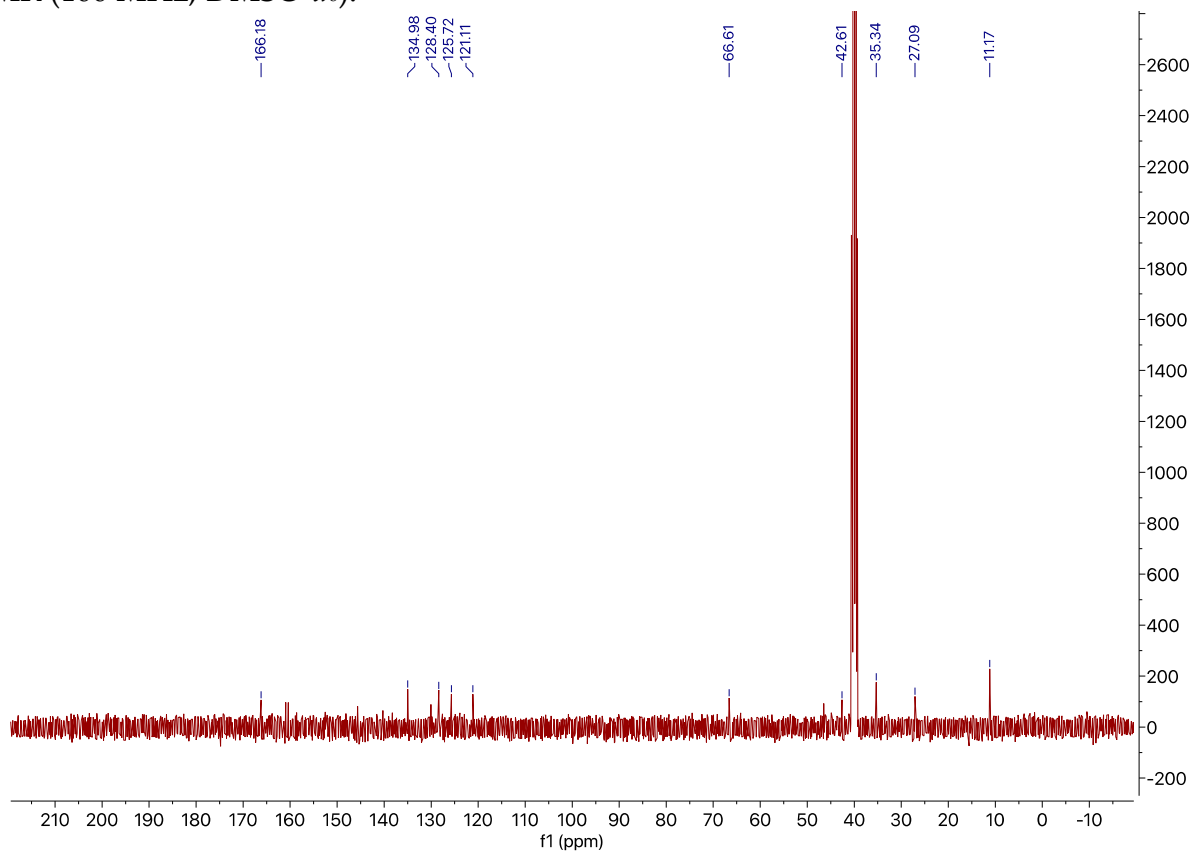

*N*-(4-Methoxyphenyl)-2-((4-oxo-3-phenyl-3,4-dihydroquinazolin-2-yl)thio)acetamide (**5j**)

$^1\text{H}$  NMR (400 MHz,  $\text{DMSO}-d_6$ ):

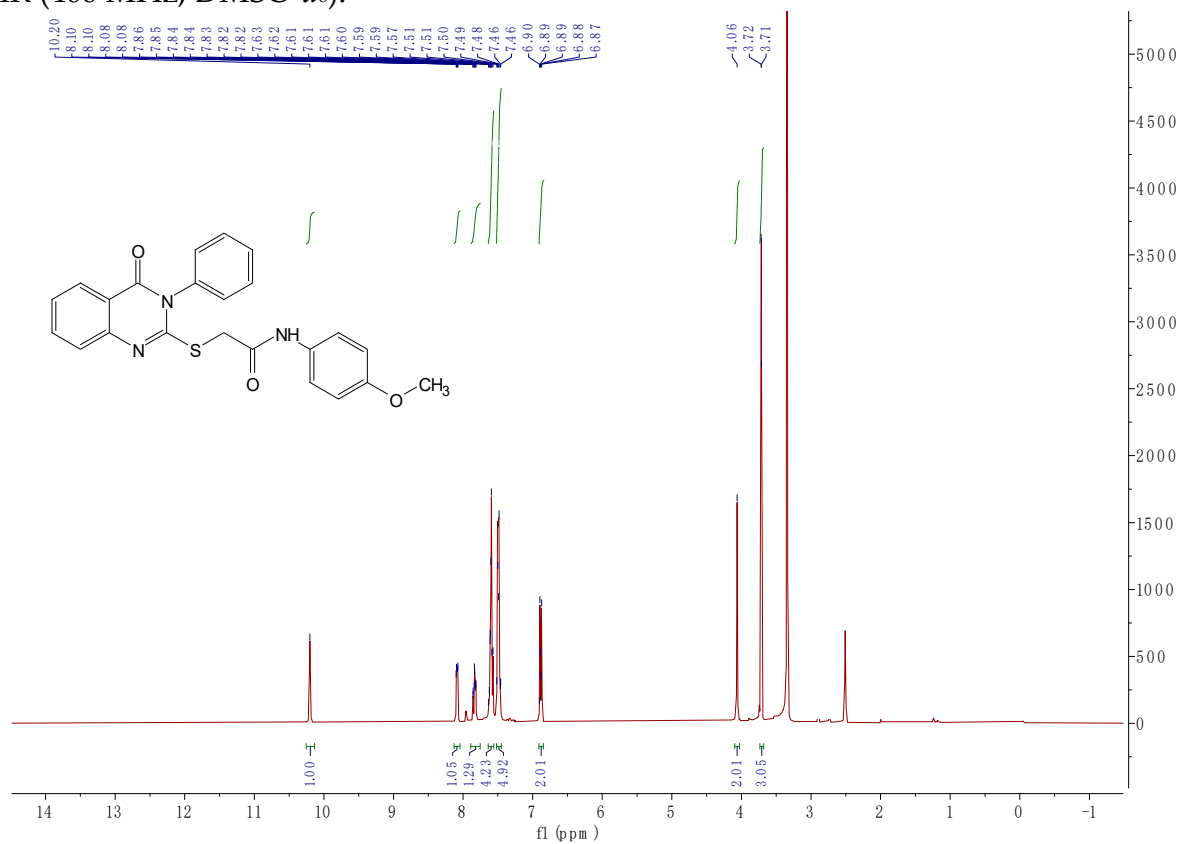

$^{13}\text{C}$  NMR (100 MHz,  $\text{DMSO}-d_6$ ):

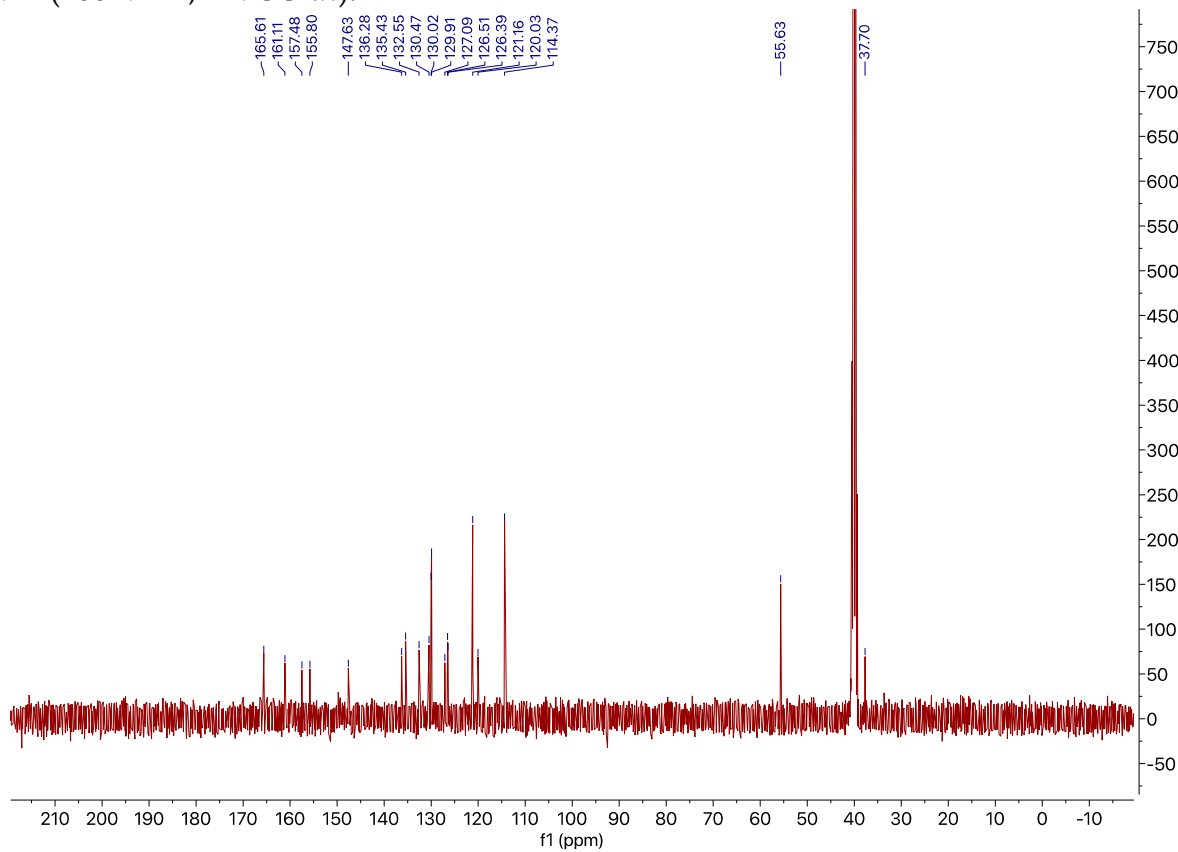

2-((6-Chloro-3-cyclopropyl-4-oxo-3,4-dihydroquinazolin-2-yl)thio)-N-(4-methoxyphenyl)acetamide (**5k**)

$^1\text{H}$  NMR (400 MHz,  $\text{CDCl}_3$ ):

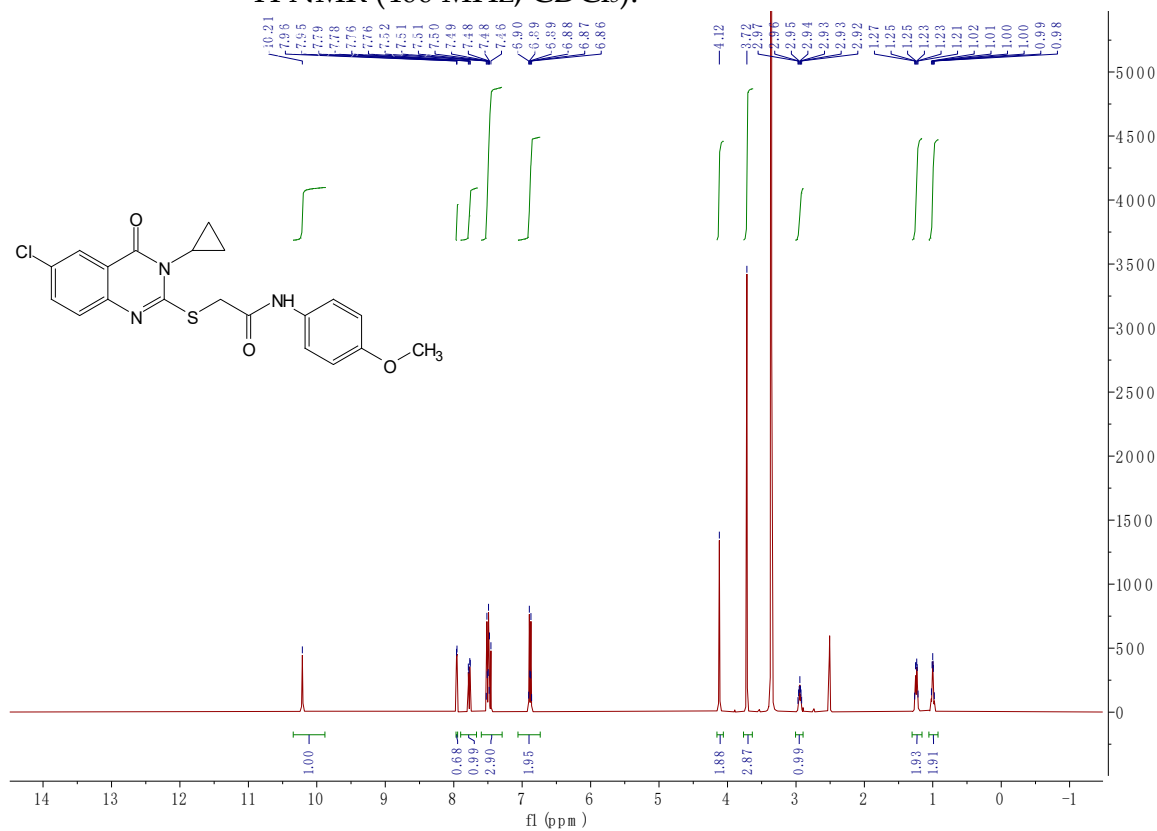

$^{13}\text{C}$  NMR (100 MHz,  $\text{CDCl}_3$ ):

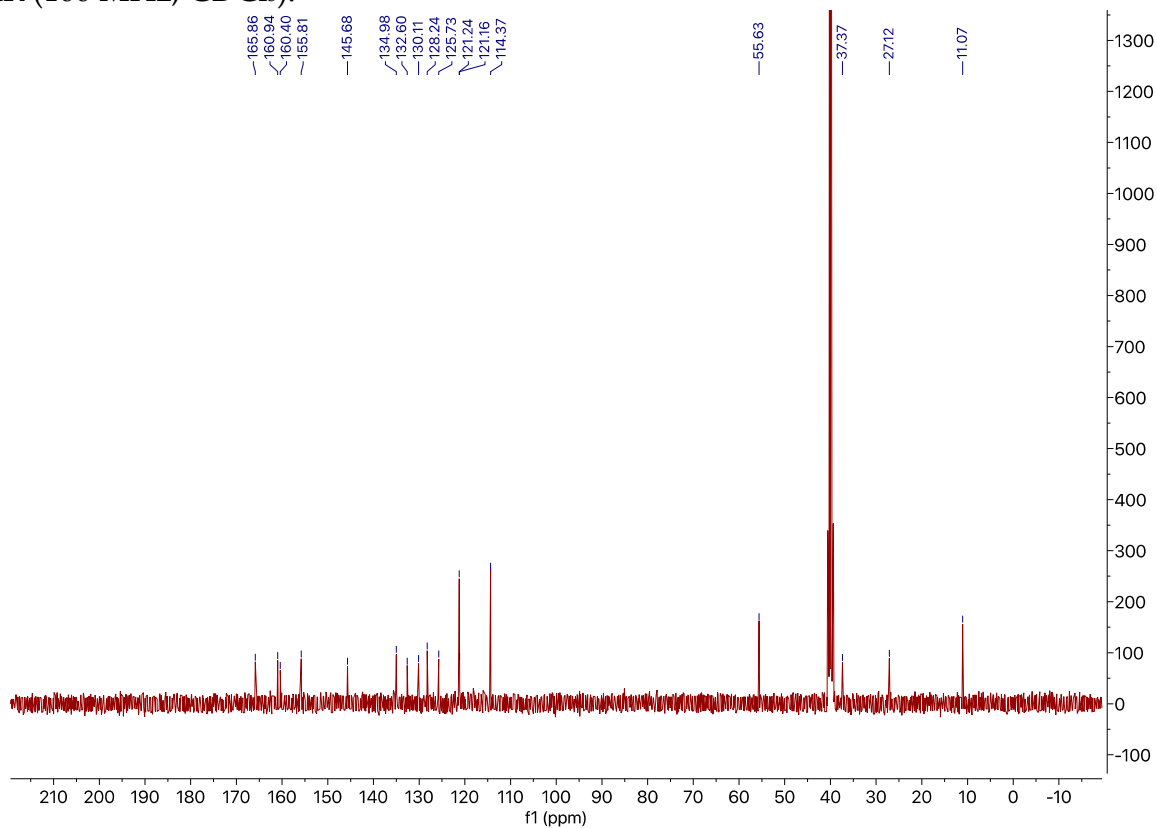



2-(4-(((3-Cyclopropyl-4-oxo-3,4-dihydroquinazolin-2-yl)thio)methyl)-1H-1,2,3-triazol-1-yl)-N-phenylacetamide (**6a**)

$^1\text{H}$  NMR (400 MHz,  $\text{DMSO}-d_6$ ):

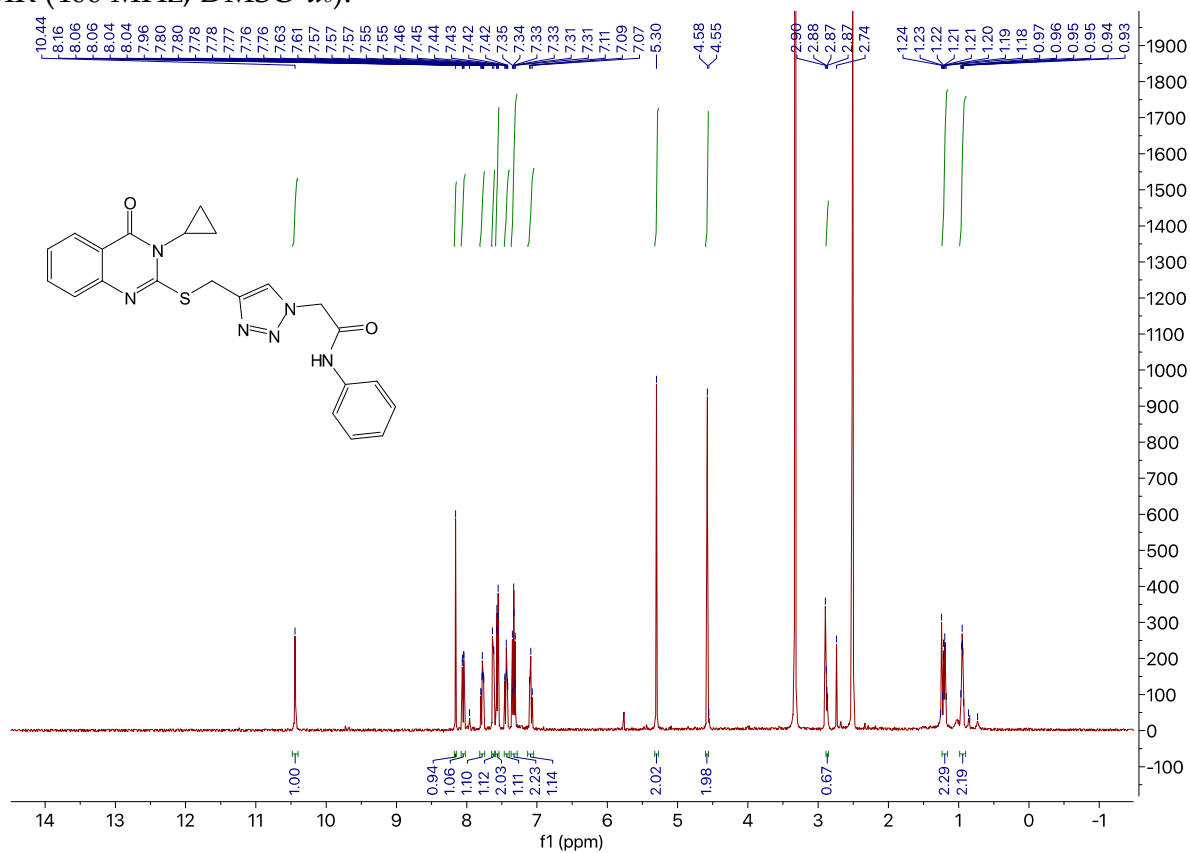

$^{13}\text{C}$  NMR (100 MHz,  $\text{DMSO}-d_6$ ):

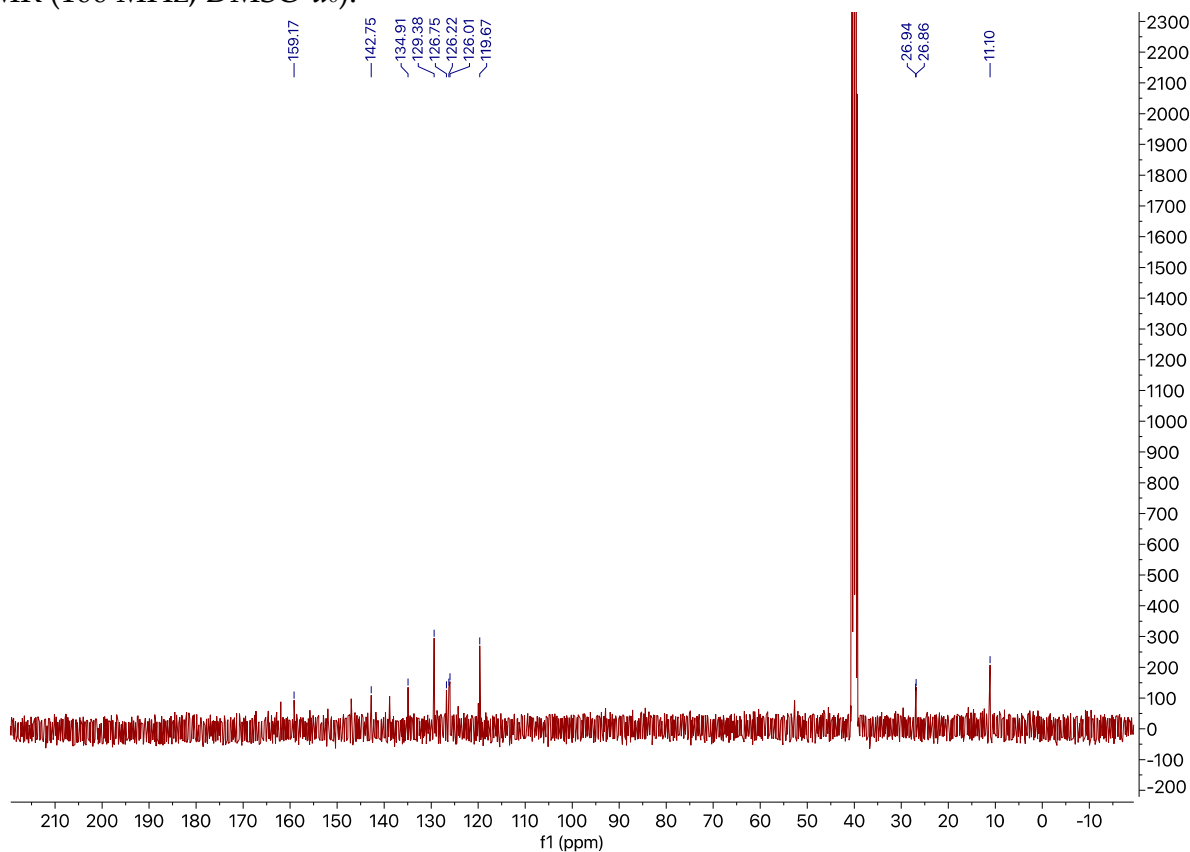

2-(4-(((3-Cyclopropyl-4-oxo-3,4-dihydroquinazolin-2-yl)thio)methyl)-1H-1,2,3-triazol-1-yl)-N-(4-methoxyphenyl)acetamide (**6b**)

$^1\text{H}$  NMR (400 MHz,  $\text{DMSO}-d_6$ ):

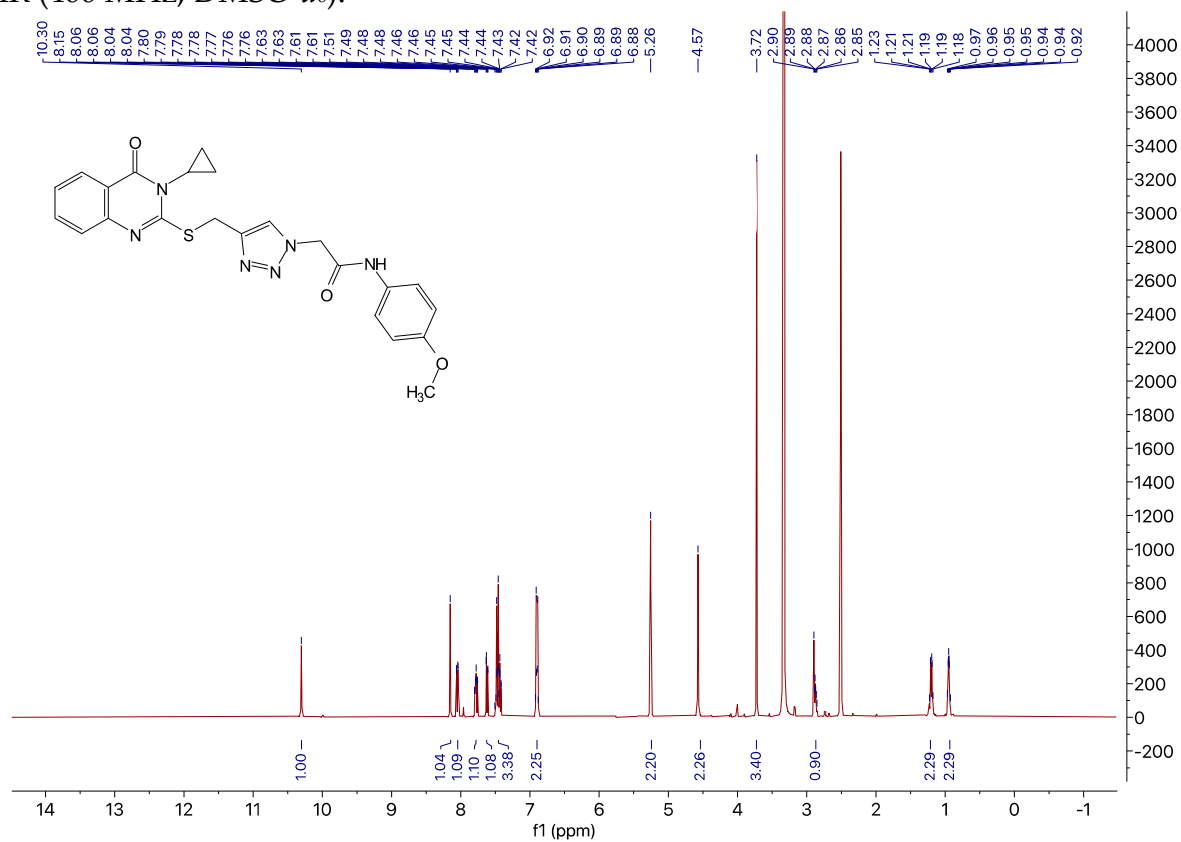

$^{13}\text{C}$  NMR (100 MHz,  $\text{DMSO}-d_6$ ):

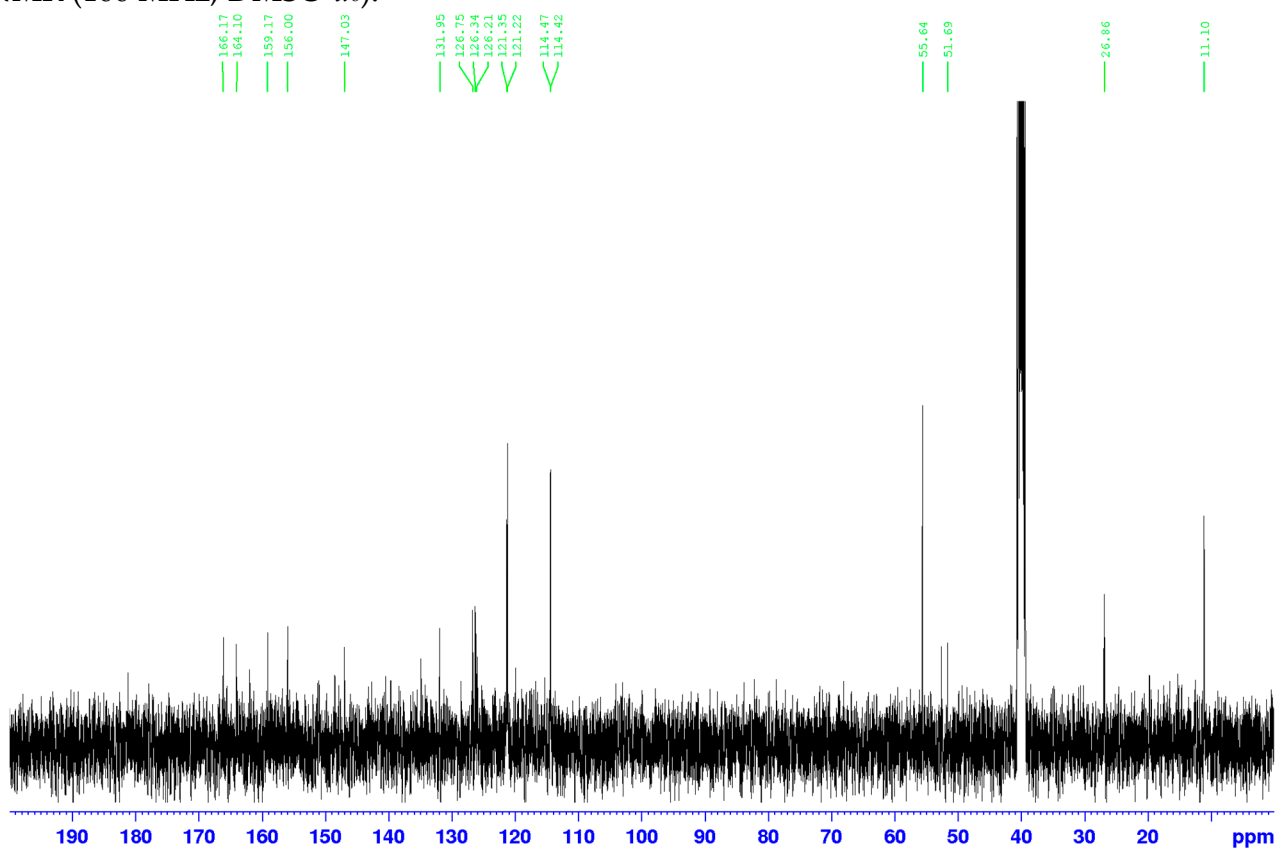

2-(4-(((6-Chloro-3-cyclopropyl-4-oxo-3,4-dihydroquinazolin-2-yl)thio)methyl)-1H-1,2,3-triazol-1-yl)-N-(4-methoxyphenyl)acetamide (**6c**)

$^1\text{H}$  NMR (400 MHz,  $\text{DMSO}-d_6$ ):

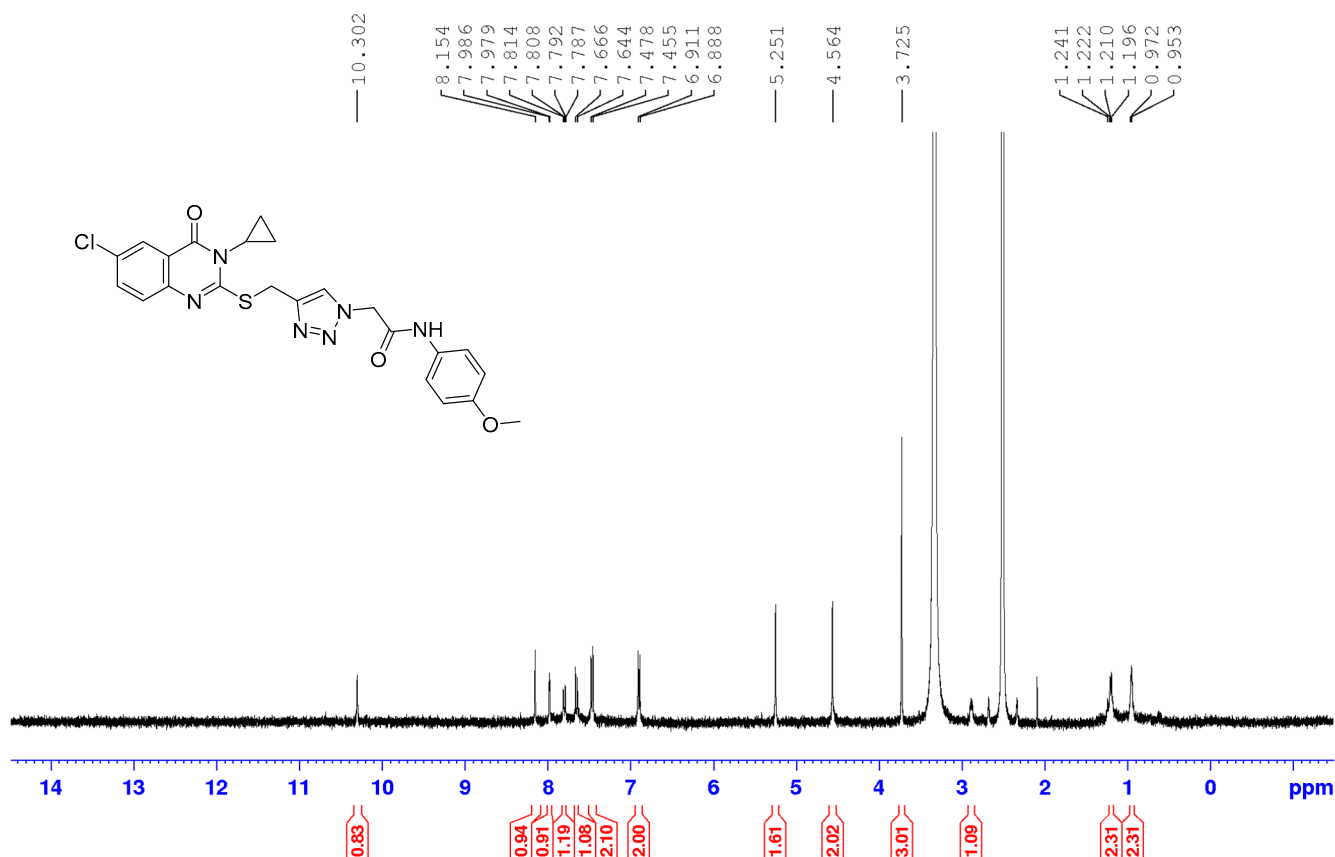

$^{13}\text{C}$  NMR (100 MHz,  $\text{DMSO}-d_6$ ):

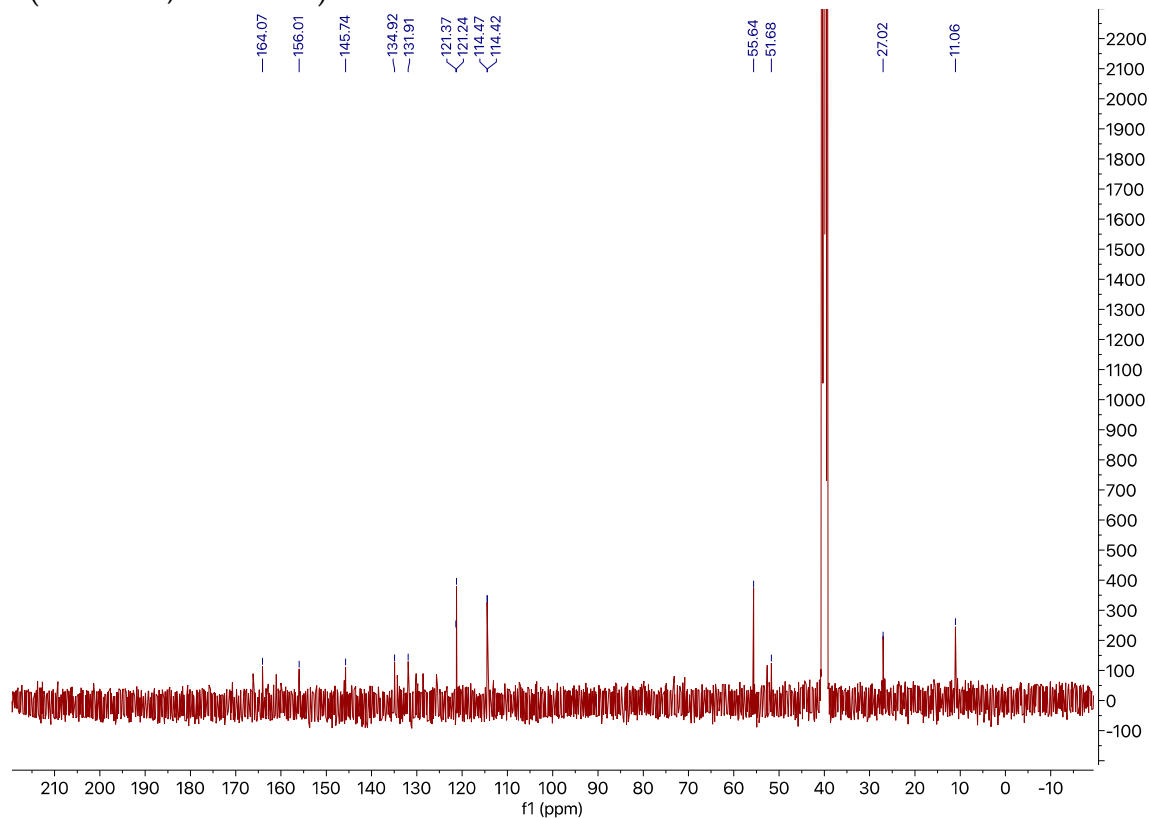

*N*-(4-Methoxyphenyl)-2-(4-(((4-oxo-3-phenyl-3,4-dihydroquinazolin-2-yl)thio)methyl)-1*H*-1,2,3-triazol-1-yl)acetamide (**6d**)

$^1\text{H}$  NMR (400 MHz,  $\text{DMSO-}d_6$ ):

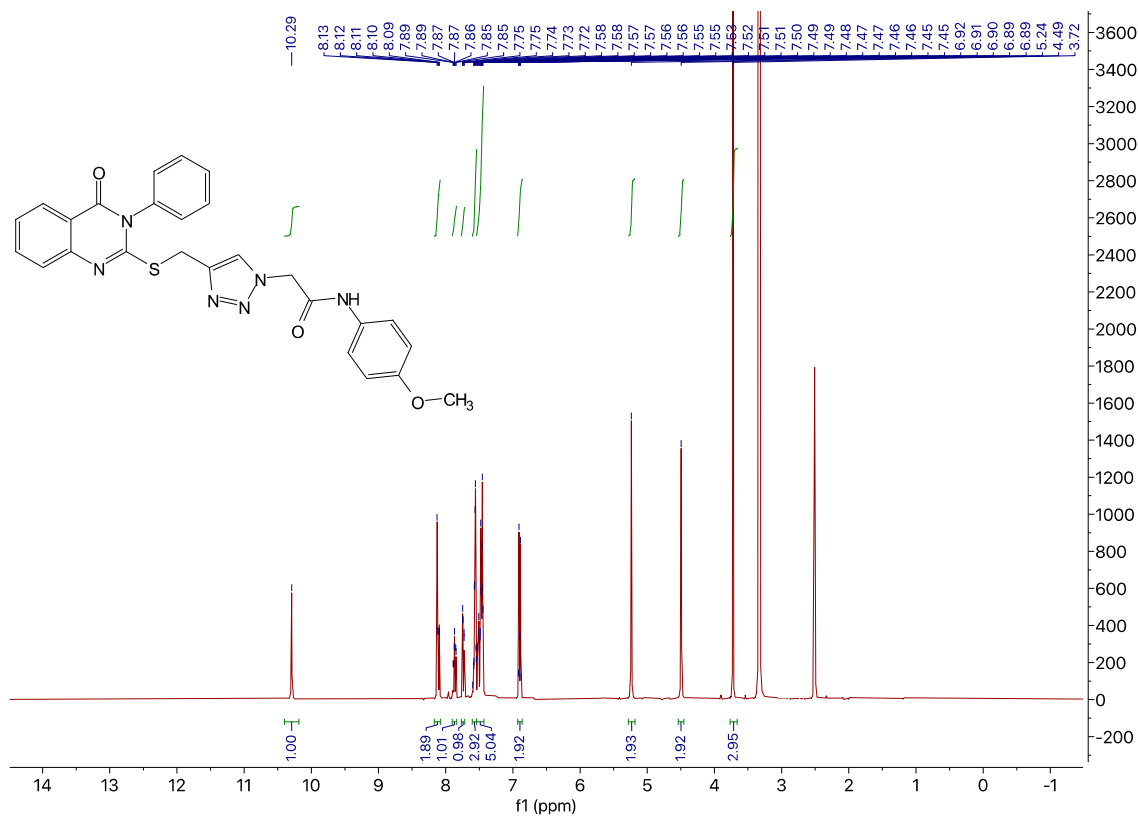

$^{13}\text{C}$  NMR (100 MHz,  $\text{DMSO-}d_6$ ):

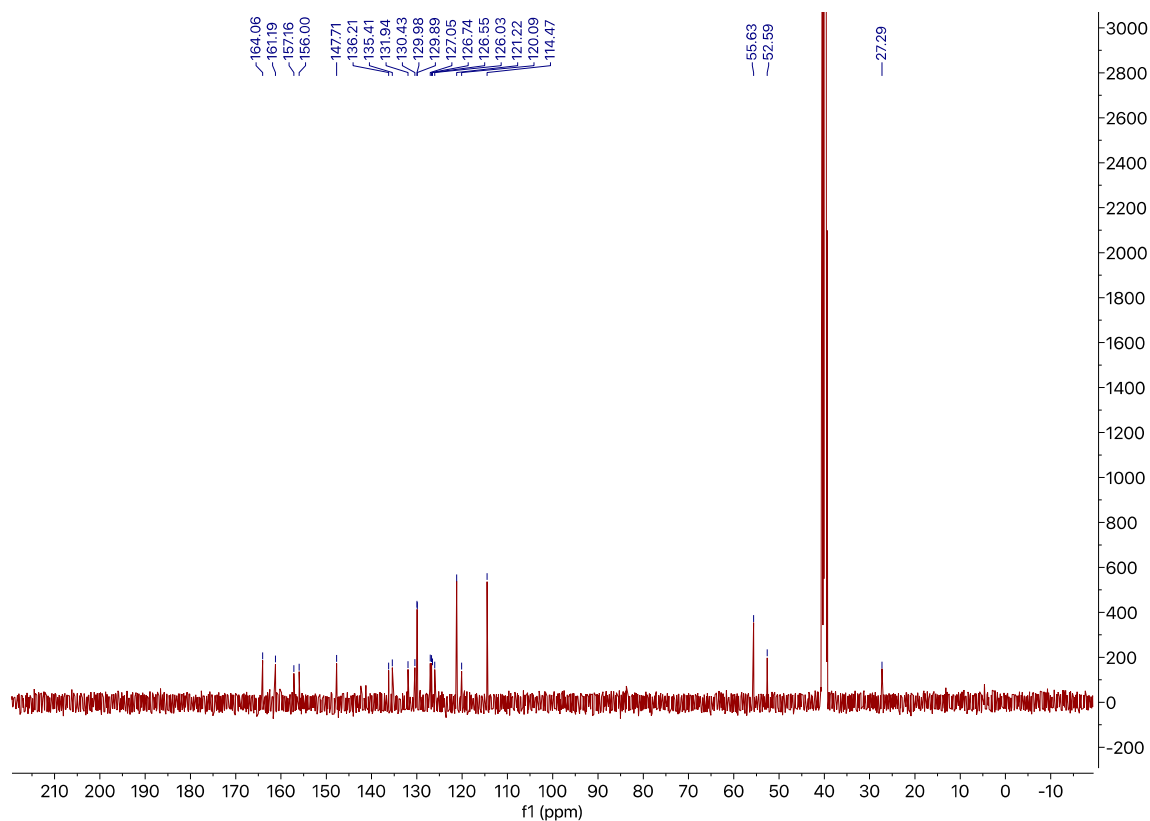

2-(4-(((3-Cyclopropyl-4-oxo-3,4-dihydroquinazolin-2-yl)thio)methyl)-1H-1,2,3-triazol-1-yl)-N-(4-nitrophenyl)acetamide (**6e**)

$^1\text{H}$  NMR (400 MHz,  $\text{DMSO}-d_6$ ):

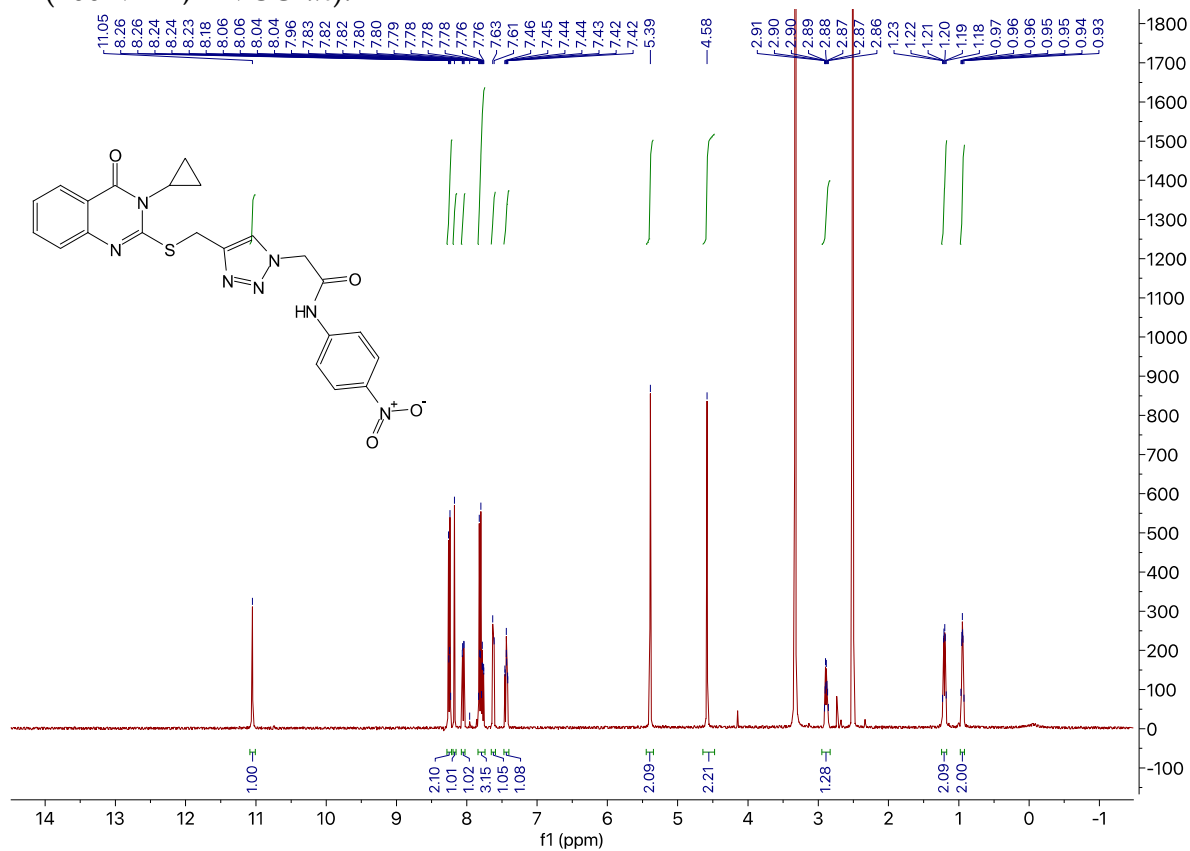

$^{13}\text{C}$  NMR (100 MHz,  $\text{DMSO}-d_6$ ):

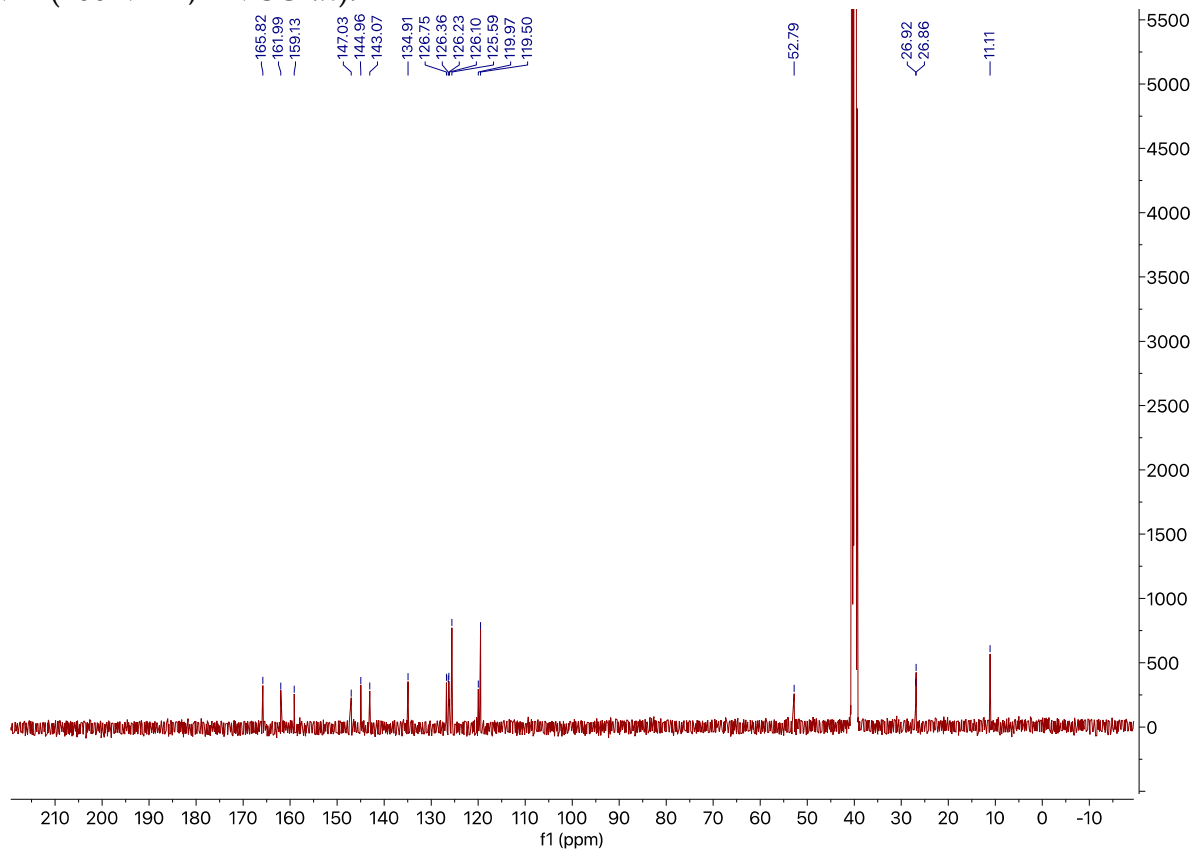

<sup>1</sup>H NMR (400 MHz, DMSO-*d*<sub>6</sub>)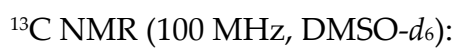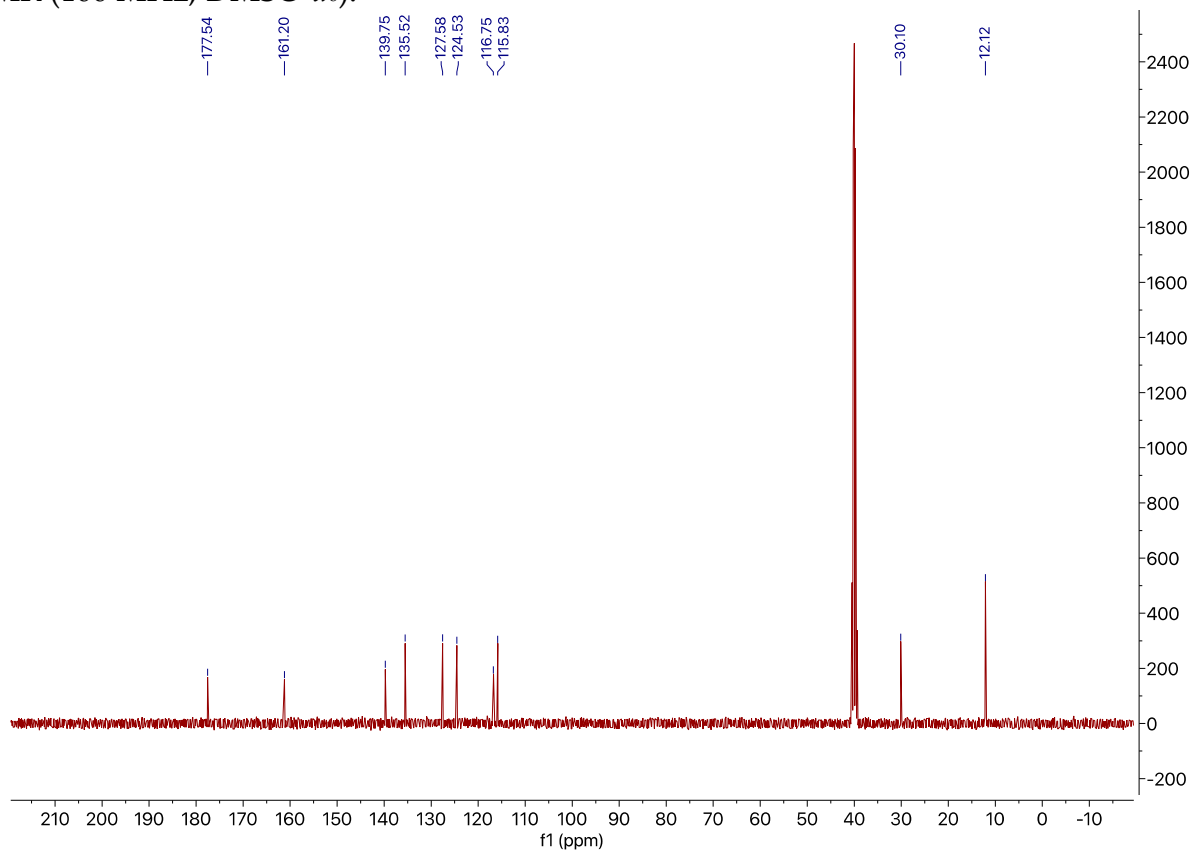

# 2-Mercapto-3-phenylquinazolin-4(3H)-one (8b)

$^1\text{H}$  NMR (400 MHz,  $\text{DMSO}-d_6$ )

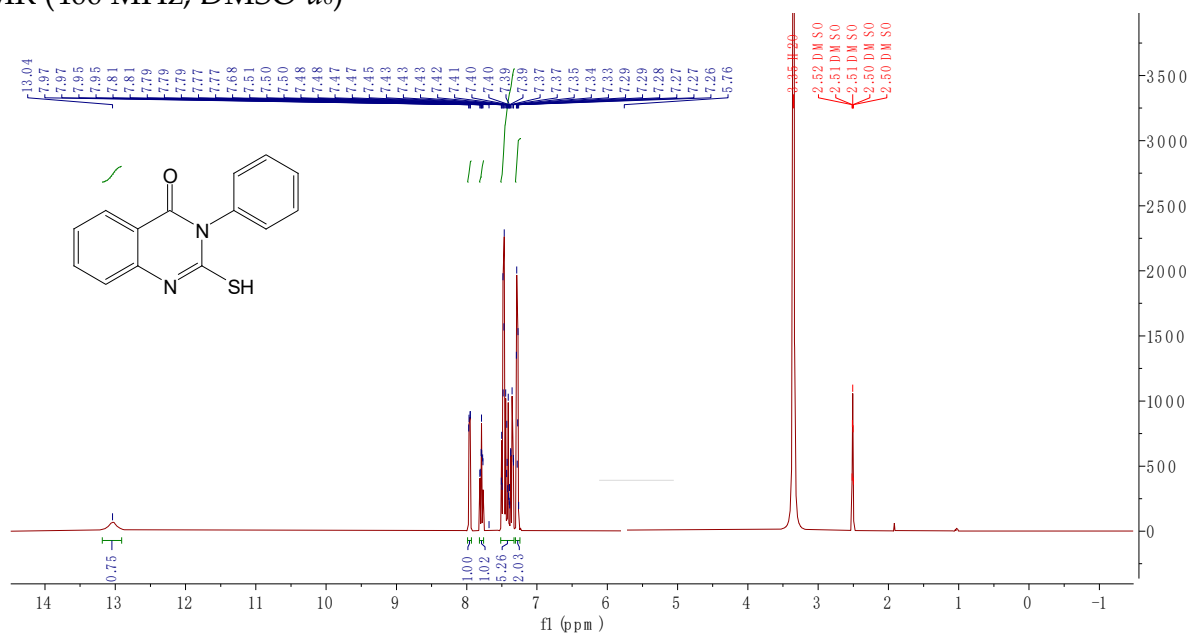

$^{13}\text{C}$  NMR (100 MHz,  $\text{DMSO}-d_6$ ):

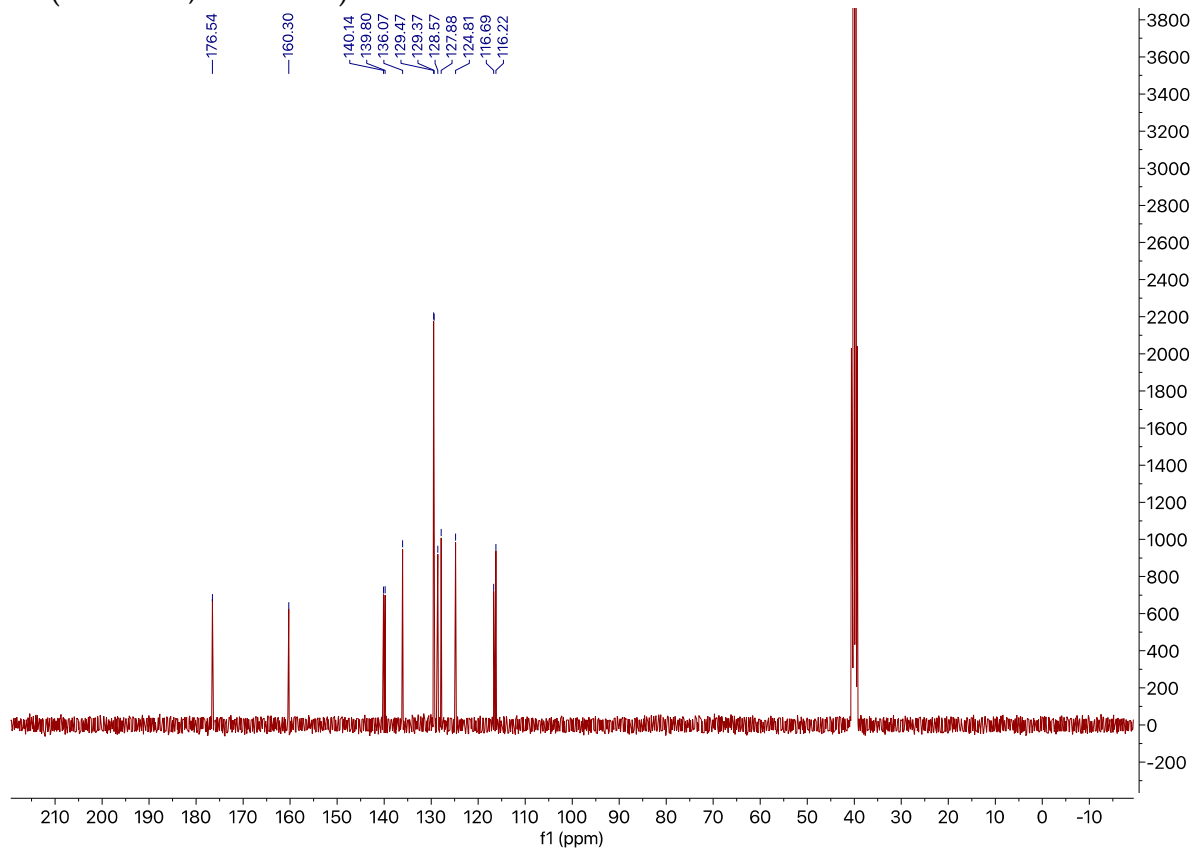

# 6-Chloro-3-cyclopropyl-2-mercaptoquinazolin-4(3H)-one (8c)

$^1\text{H}$  NMR (400 MHz,  $\text{DMSO-}d_6$ )

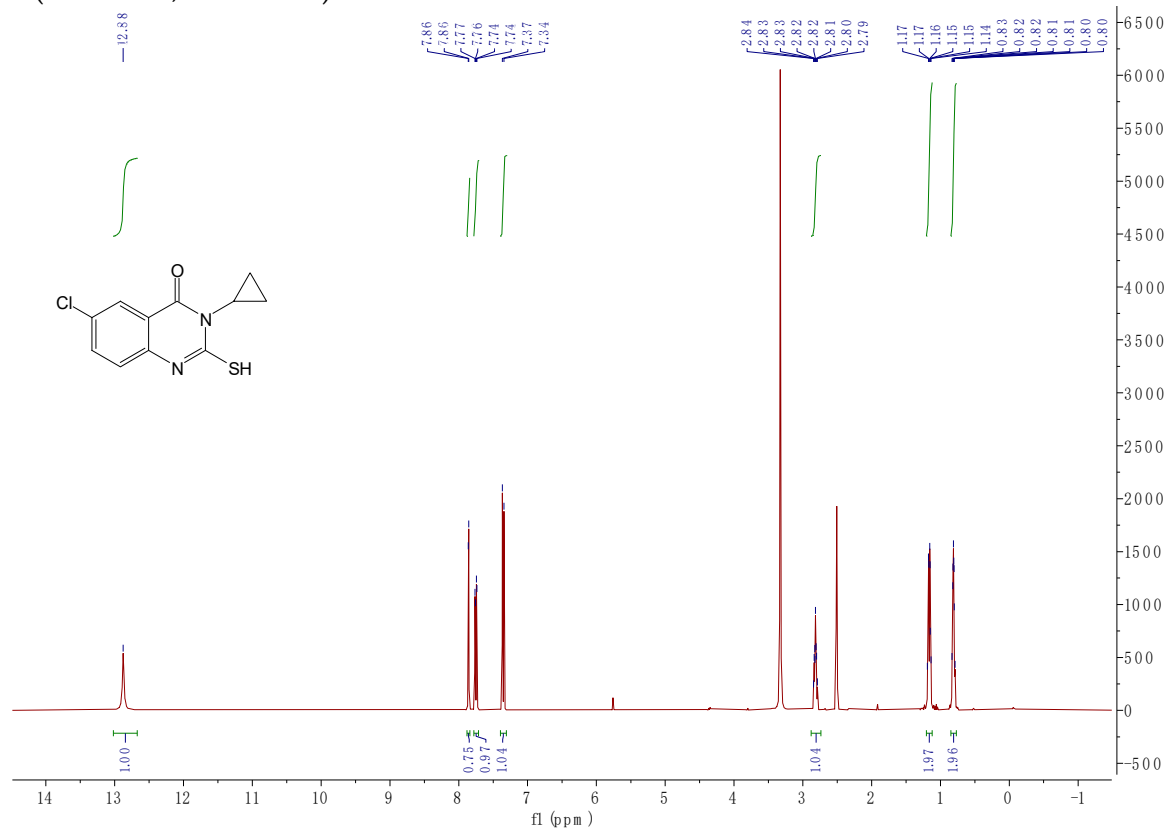

$^{13}\text{C}$  NMR (100 MHz,  $\text{DMSO-}d_6$ ):

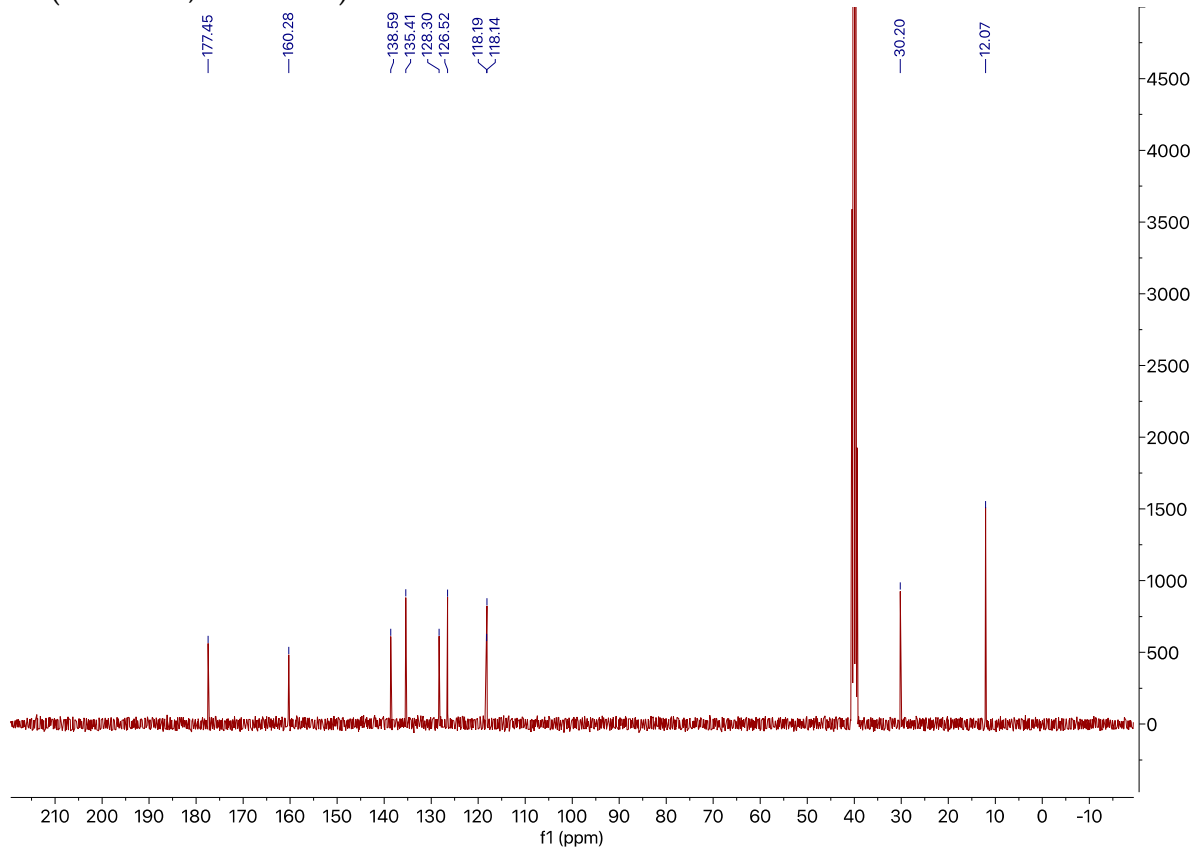



2-((3-Cyclopropyl-4-oxo-3,4-dihydroquinazolin-2-yl)thio)acetic acid (**9a**)

$^1\text{H}$  NMR (400 MHz,  $\text{DMSO}-d_6$ ):

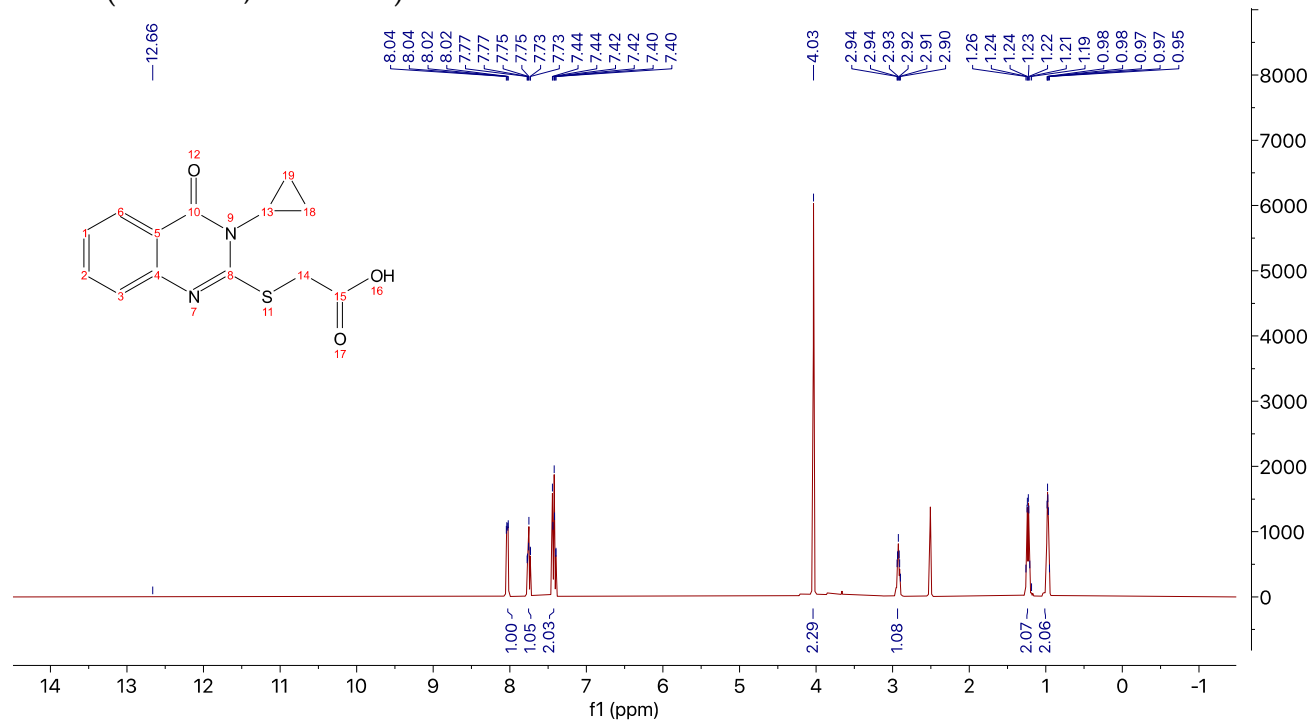

$^{13}\text{C}$  NMR (100 MHz,  $\text{DMSO}-d_6$ ):

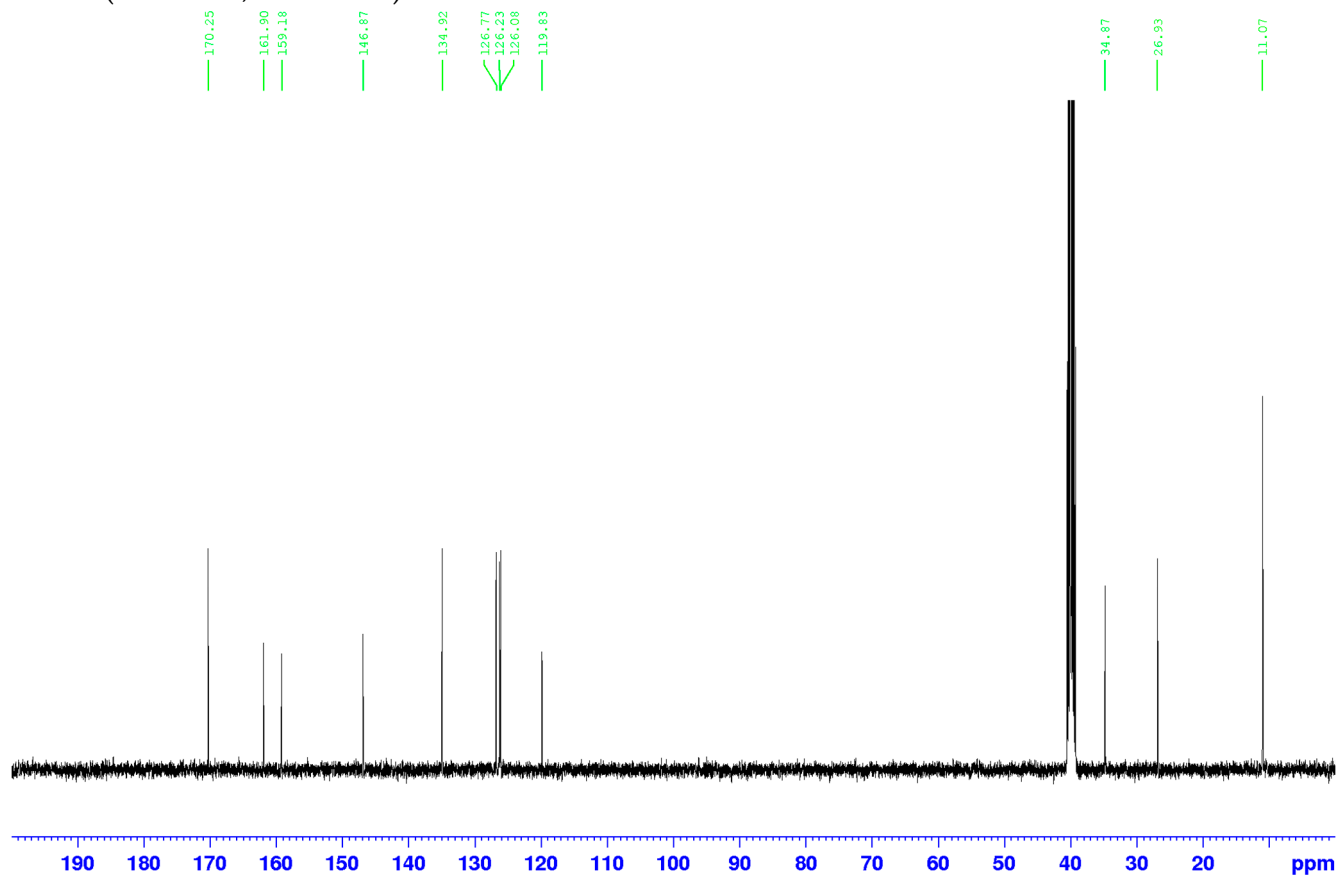

2-((4-Oxo-3-phenyl-3,4-dihydroquinazolin-2-yl)thio)acetic acid (**9b**)

$^1\text{H}$  NMR (400 MHz,  $\text{DMSO}-d_6$ ):

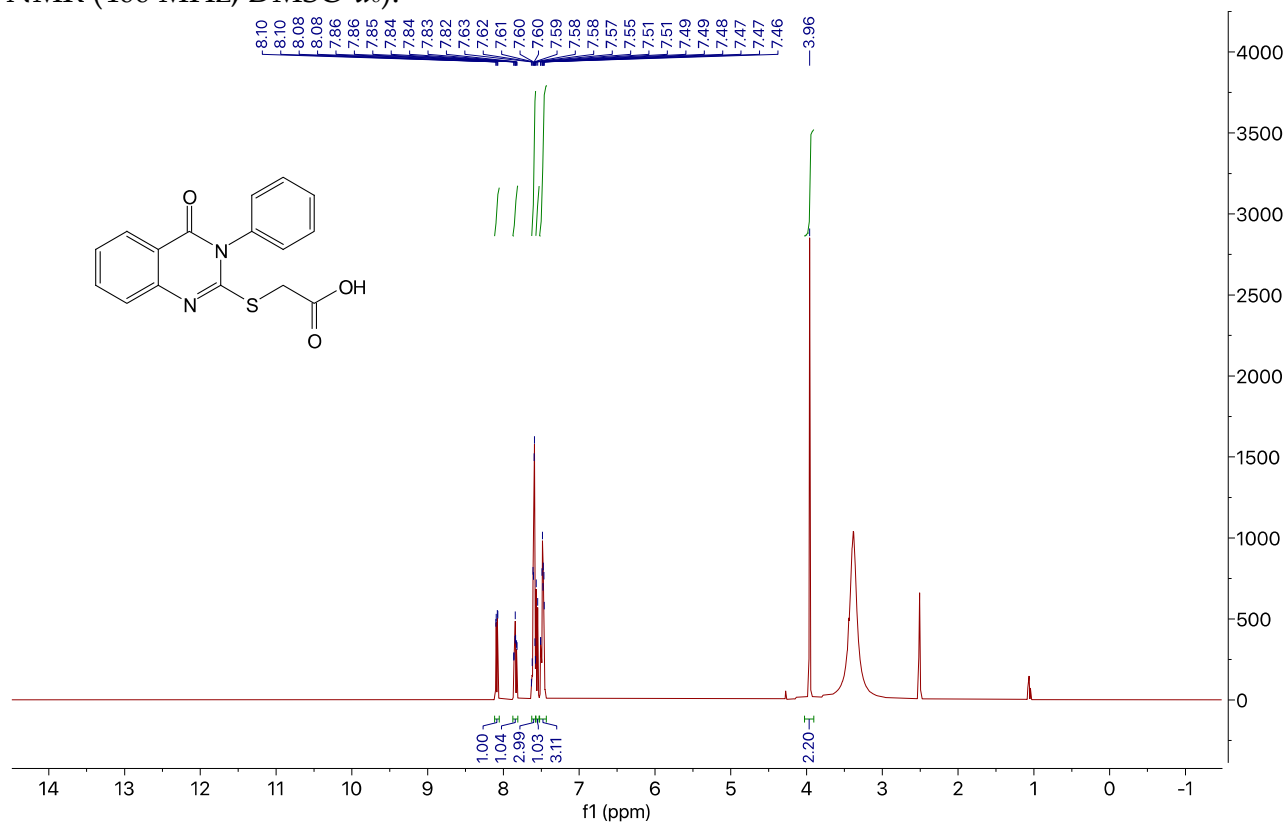

$^{13}\text{C}$  NMR (100 MHz,  $\text{DMSO}-d_6$ ):

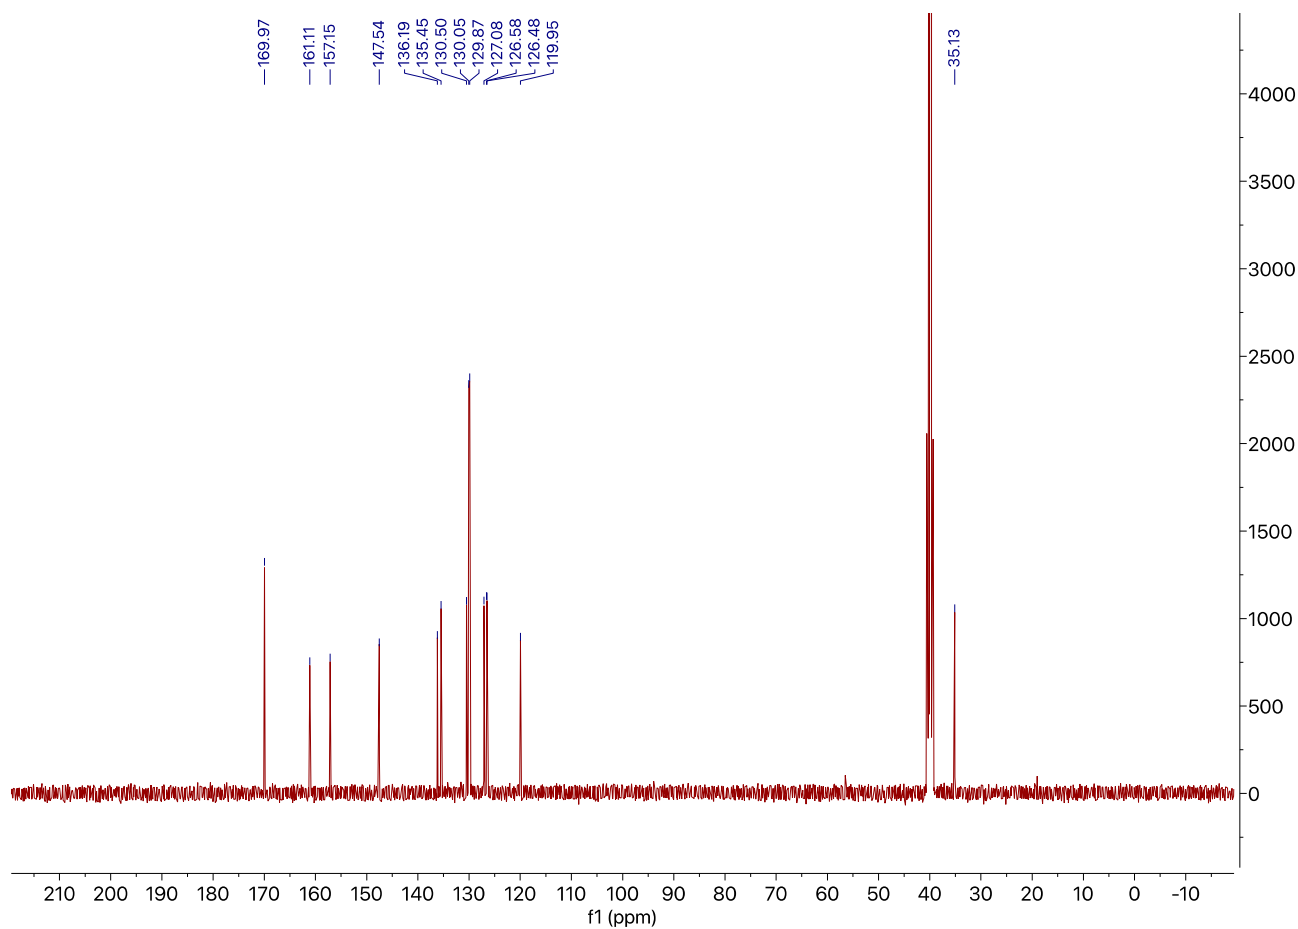

2-((6-Chloro-3-cyclopropyl-4-oxo-3,4-dihydroquinazolin-2-yl)thio)acetic acid (**9c**)

<sup>1</sup>H NMR (400 MHz, DMSO-*d*<sub>6</sub>):

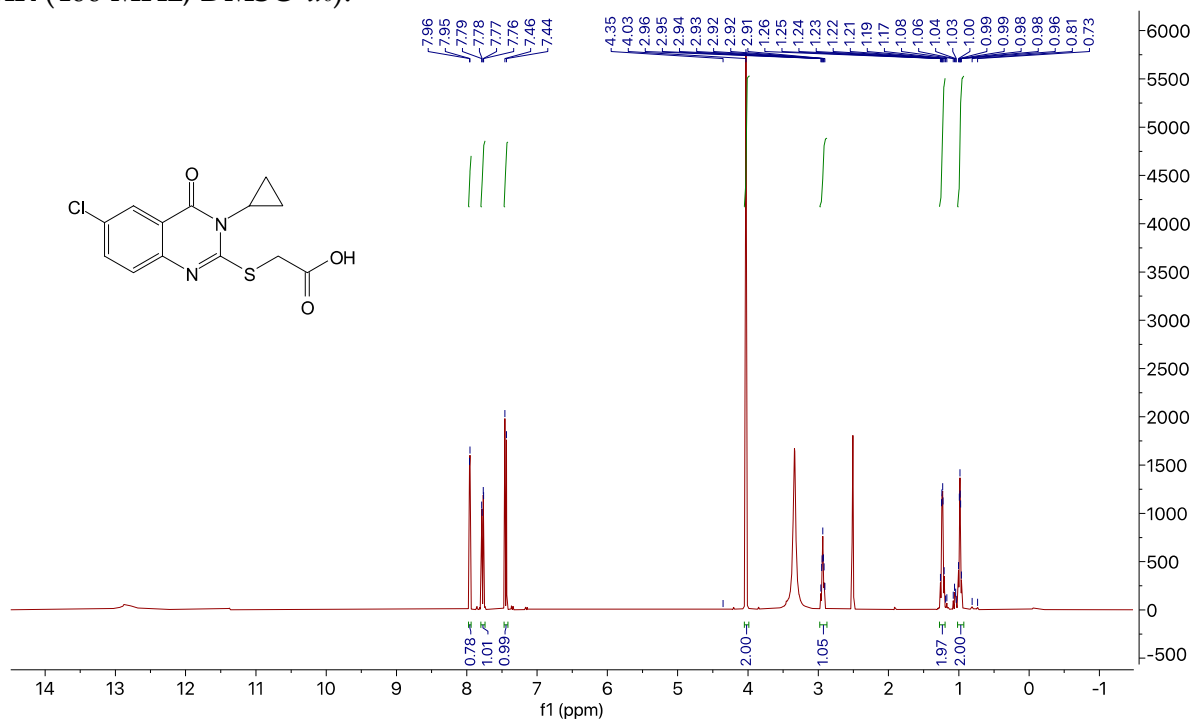

$^{13}\text{C}$  NMR (100 MHz,  $\text{DMSO}-d_6$ ):

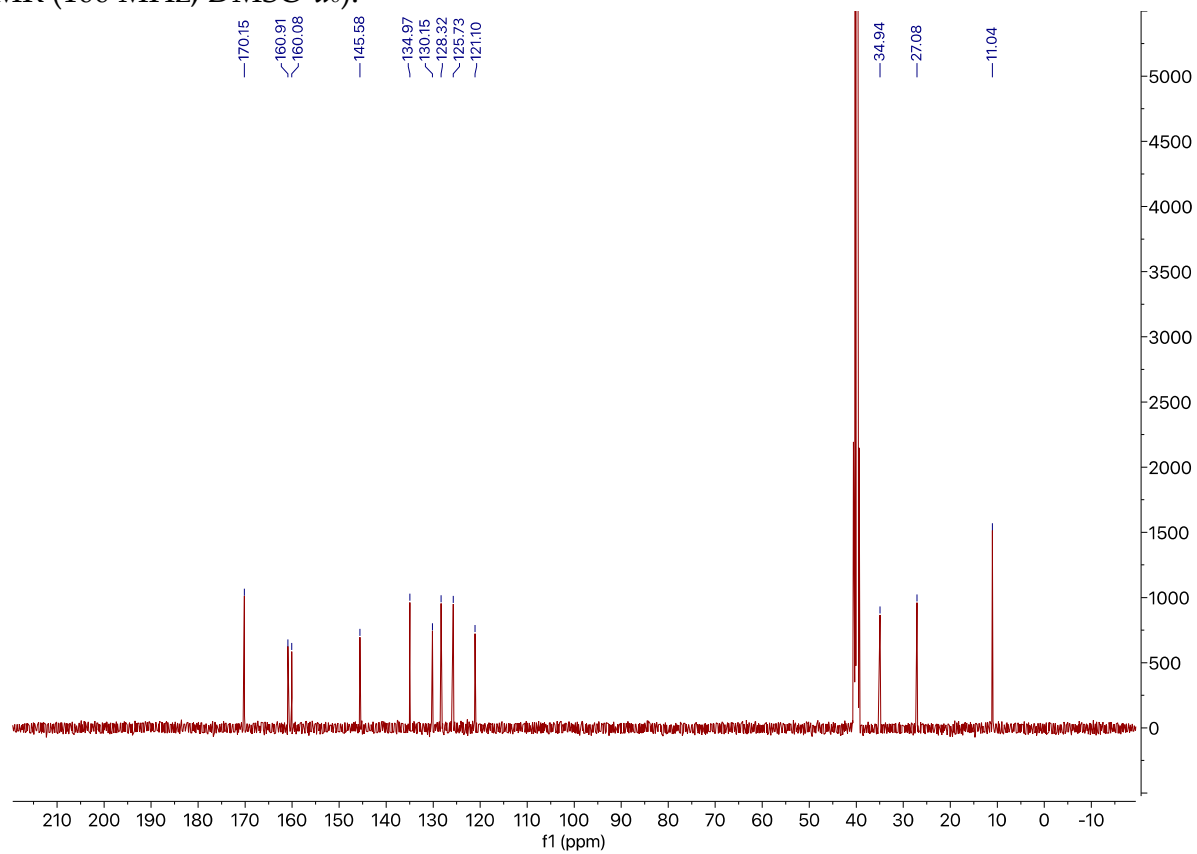

# 3-((4-Oxo-3-phenyl-3,4-dihydroquinazolin-2-yl)thio)propanoic acid (**9d**)

$^1\text{H}$  NMR (400 MHz,  $\text{DMSO}-d_6$ ):

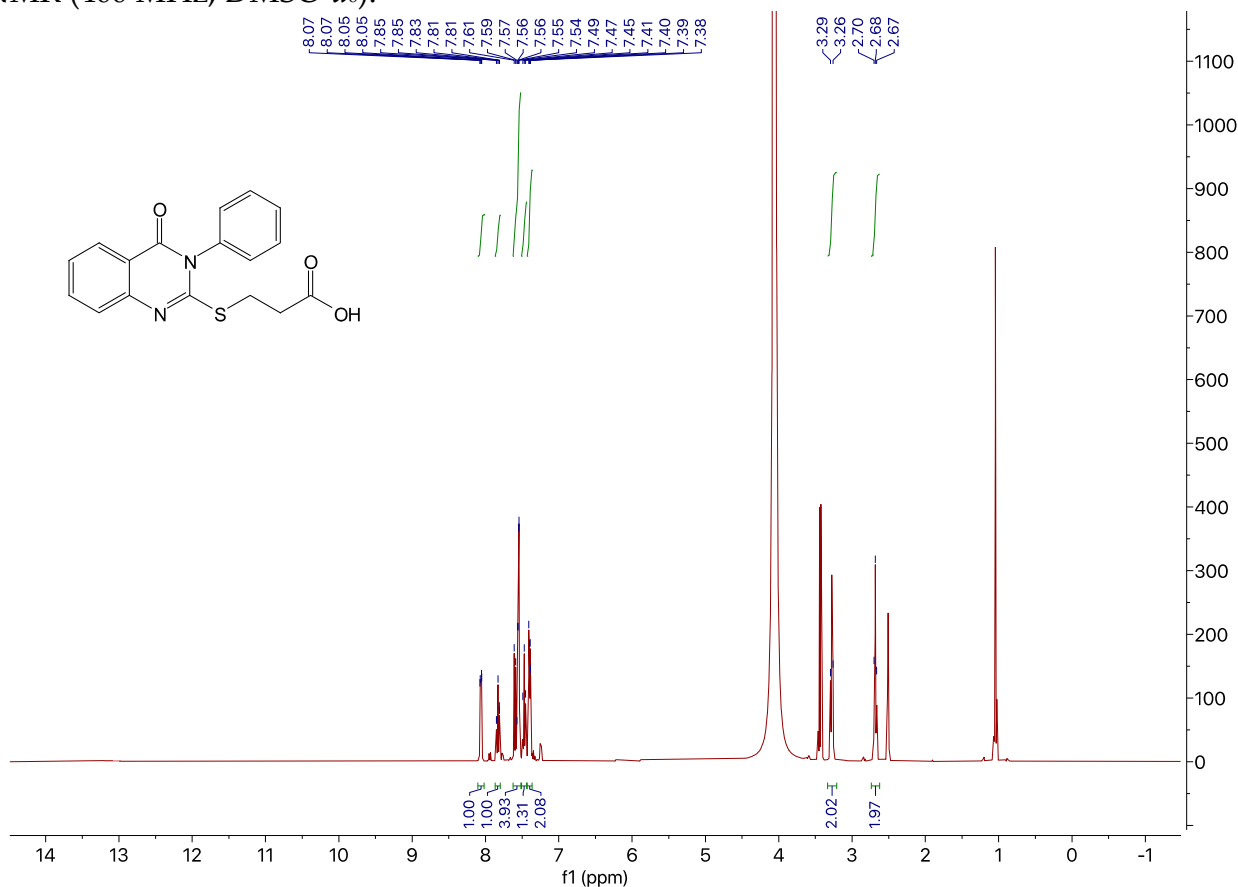

$^{13}\text{C}$  NMR (100 MHz,  $\text{DMSO}-d_6$ ):

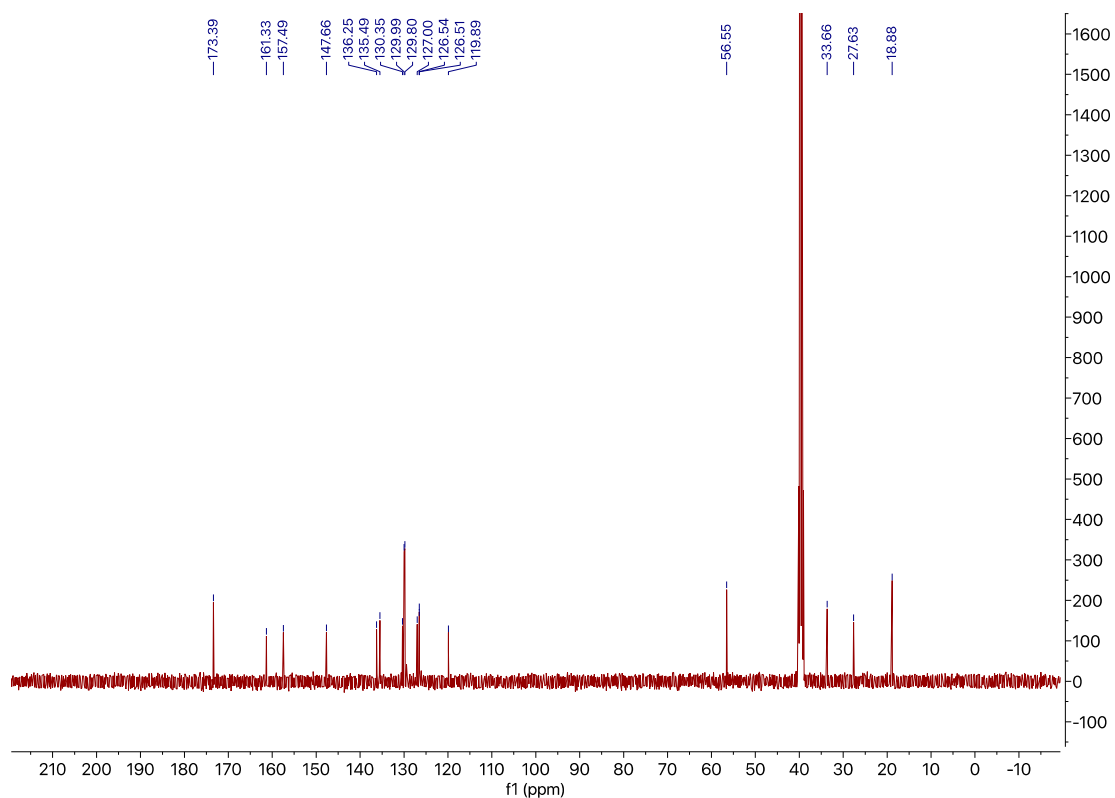

## 2-Chloro-*N*-(4-methoxyphenyl)acetamide (**12**)

$^1\text{H}$  NMR (400 MHz,  $\text{DMSO}-d_6$ ):

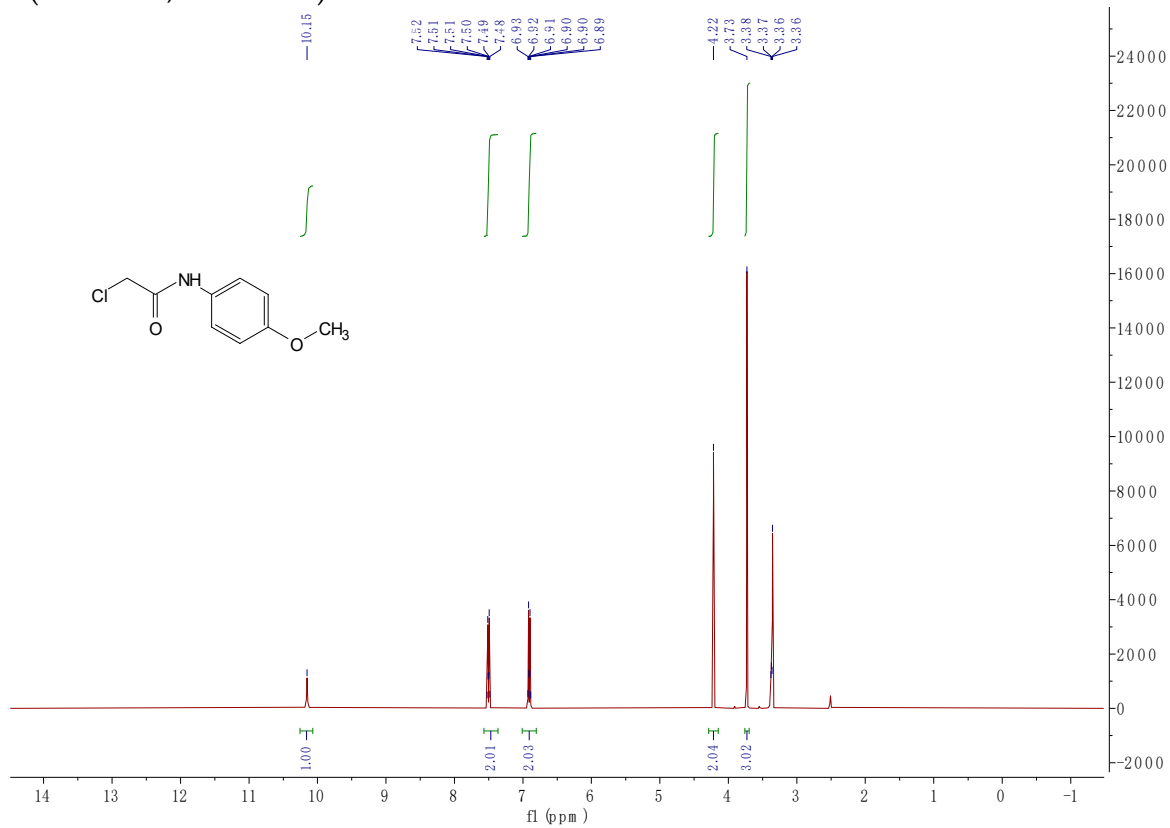

$^{13}\text{C}$  NMR (100 MHz,  $\text{DMSO}-d_6$ ):

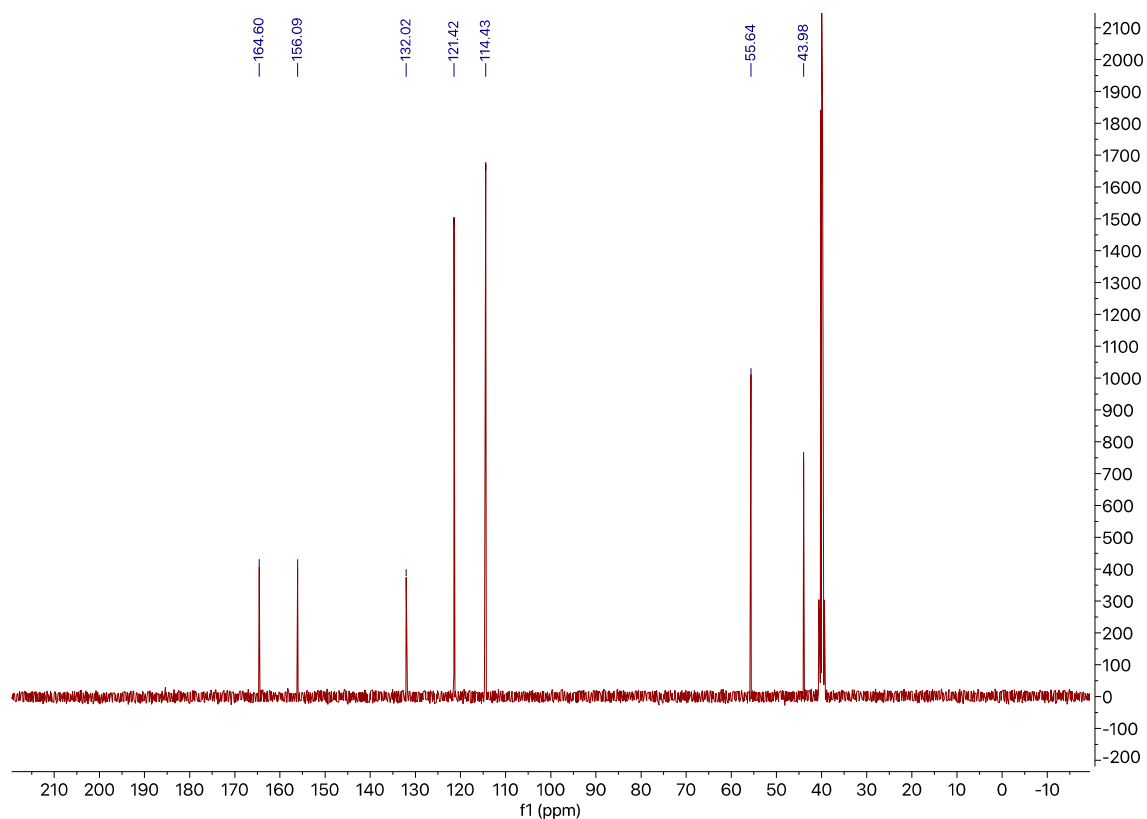

### 3-Cyclopropyl-2-(prop-2-yn-1-ylthio)quinazolin-4(3H)-one (13a)

<sup>1</sup>H NMR (400 MHz, DMSO-*d*<sub>6</sub>):

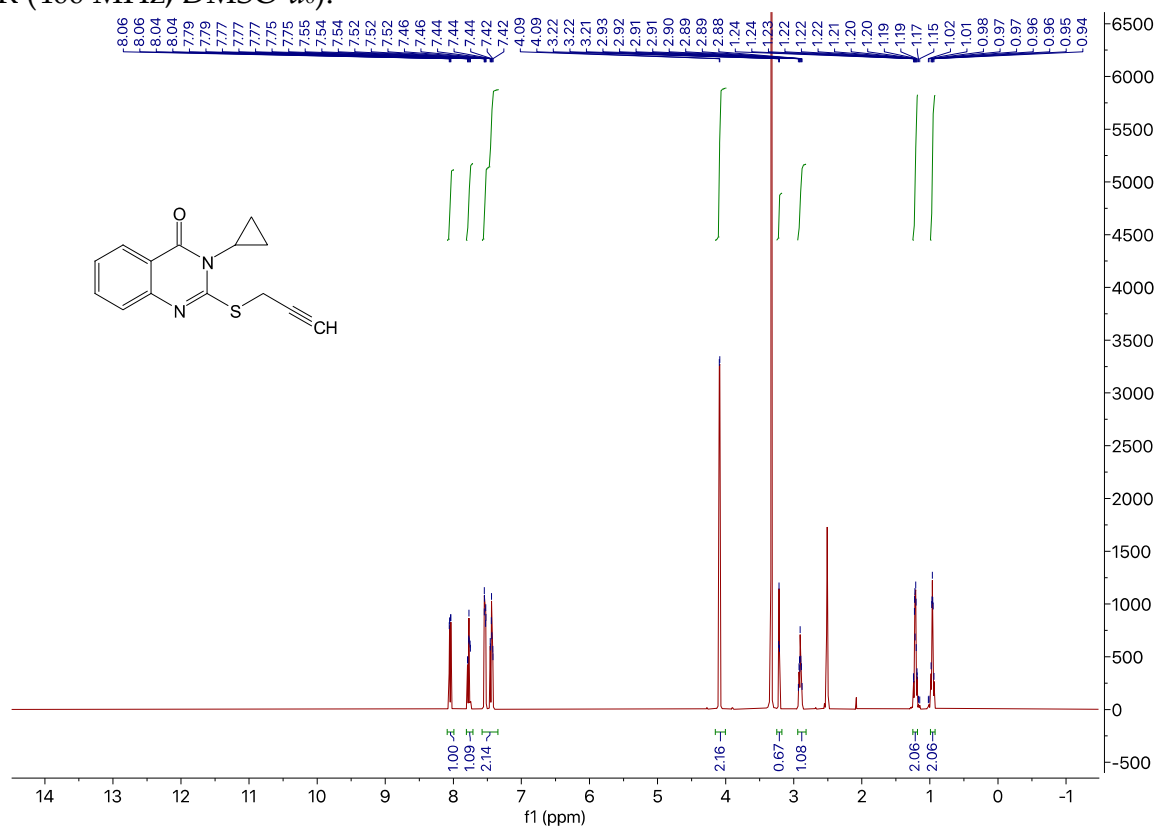

<sup>13</sup>C NMR (100 MHz, DMSO-*d*<sub>6</sub>):

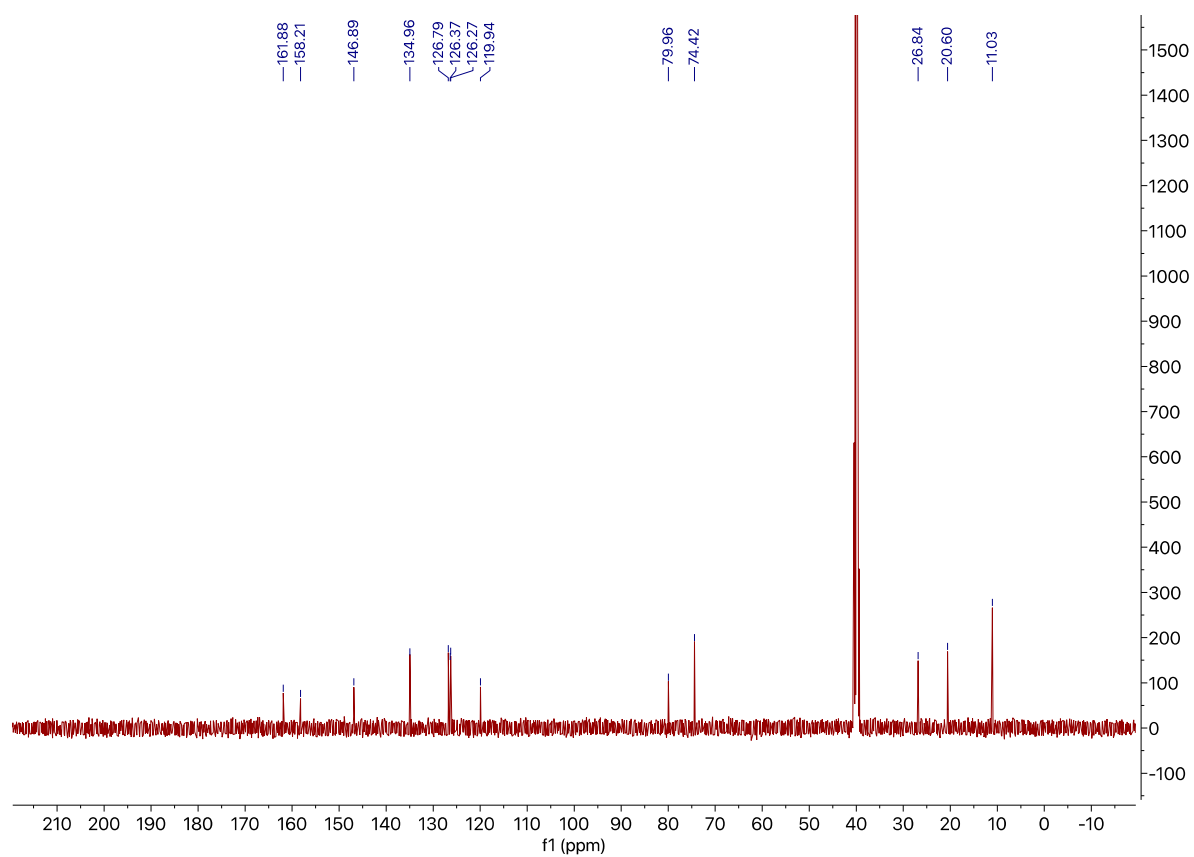



### 3-Phenyl-2-(prop-2-yn-1-ylthio)quinazolin-4(3H)-one (**13b**)

$^1\text{H}$  NMR (400 MHz,  $\text{DMSO}-d_6$ ):

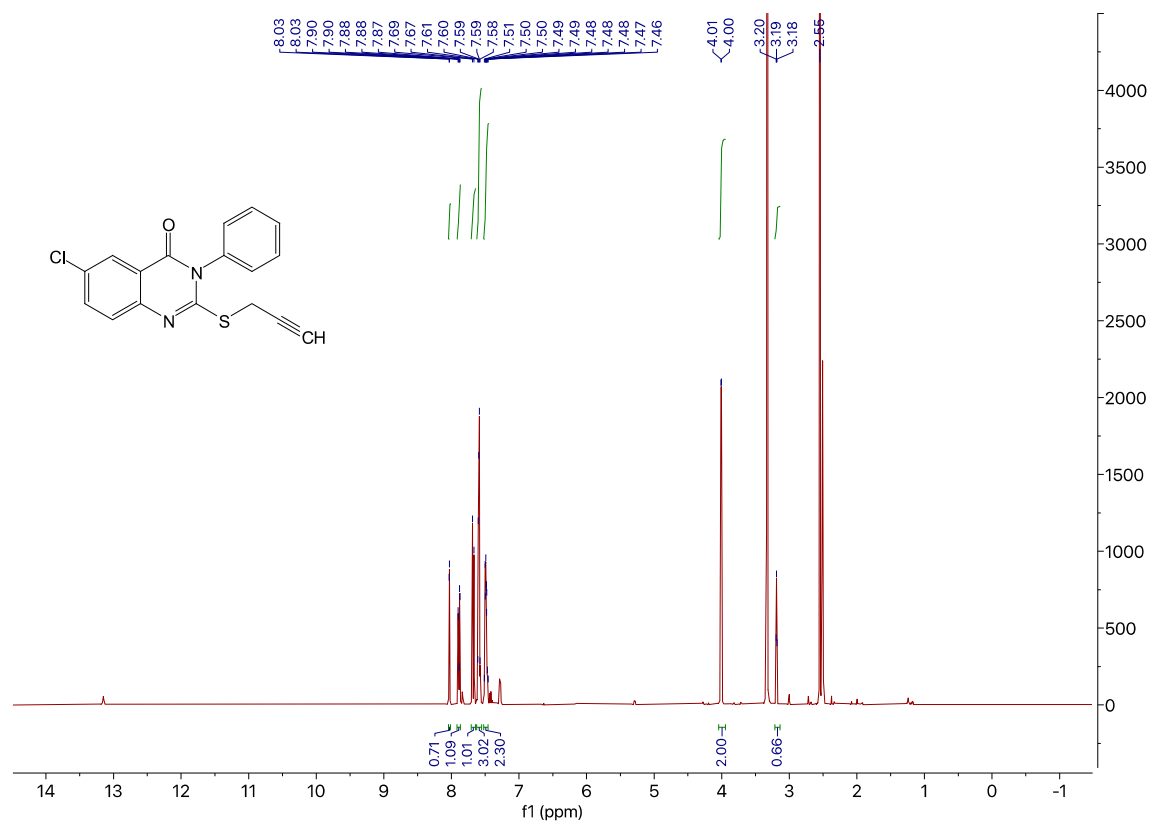

$^{13}\text{C}$  NMR (100 MHz,  $\text{DMSO}-d_6$ ):

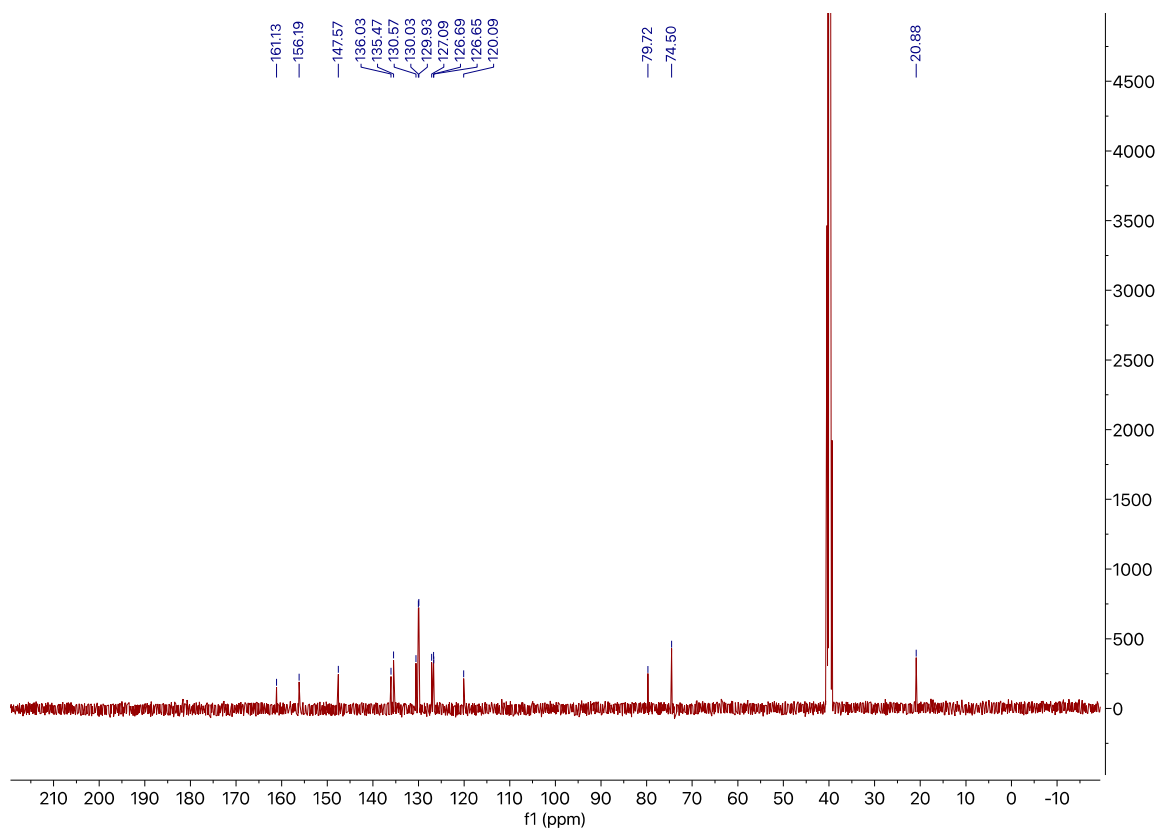



6-Chloro-3-cyclopropyl-2-(prop-2-yn-1-ylthio)quinazolin-4(3*H*)-one (**13c**)

$^1\text{H}$  NMR (400 MHz,  $\text{DMSO}-d_6$ ):

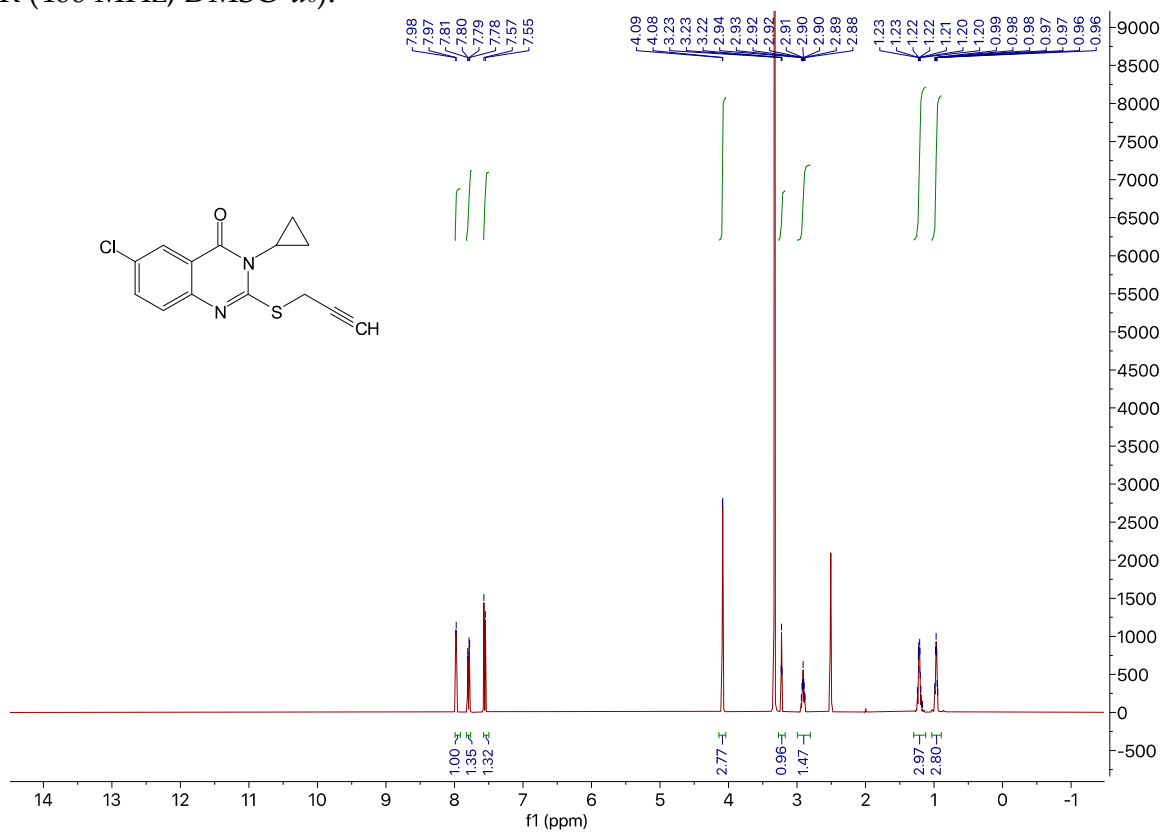

$^{13}\text{C}$  NMR (100 MHz,  $\text{DMSO}-d_6$ ):

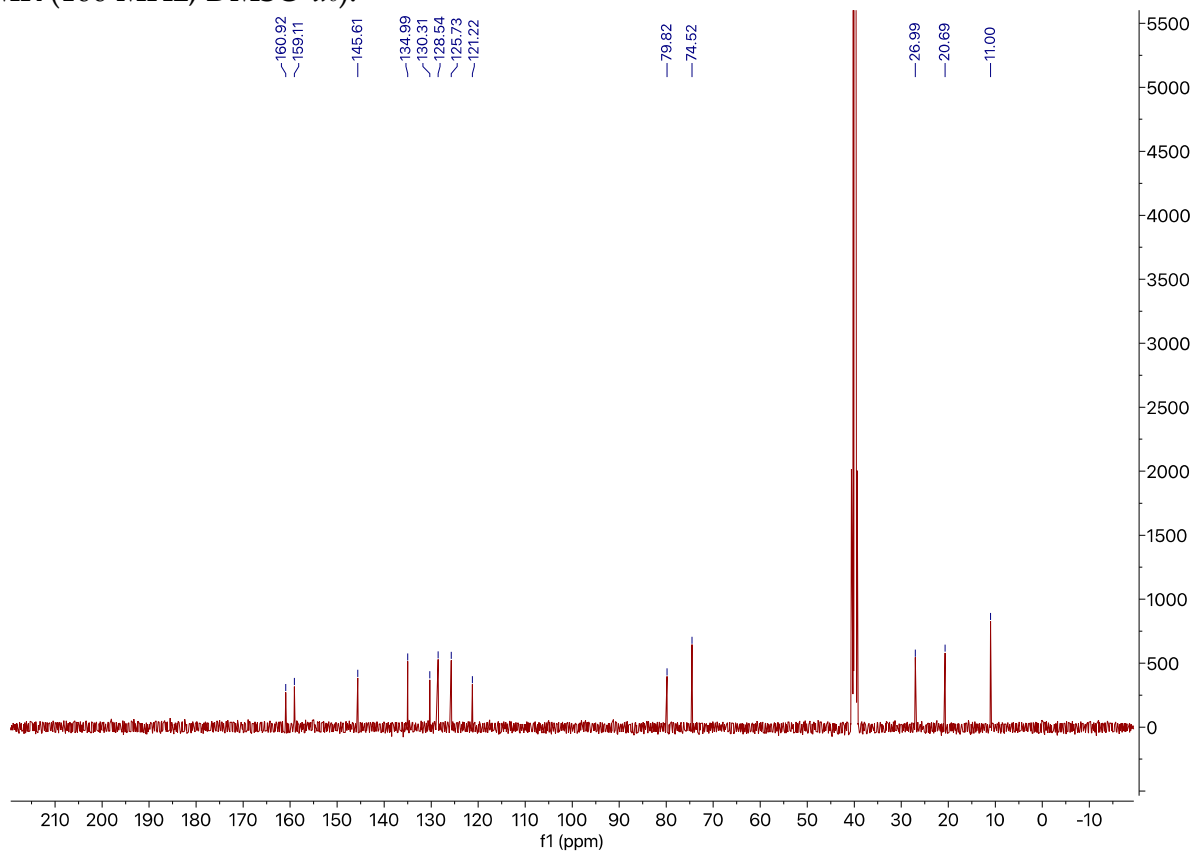



## 2-Bromo-*N*-(4-methoxyphenyl)acetamide (**15a**)

$^1\text{H}$  NMR (400 MHz,  $\text{DMSO}-d_6$ ):

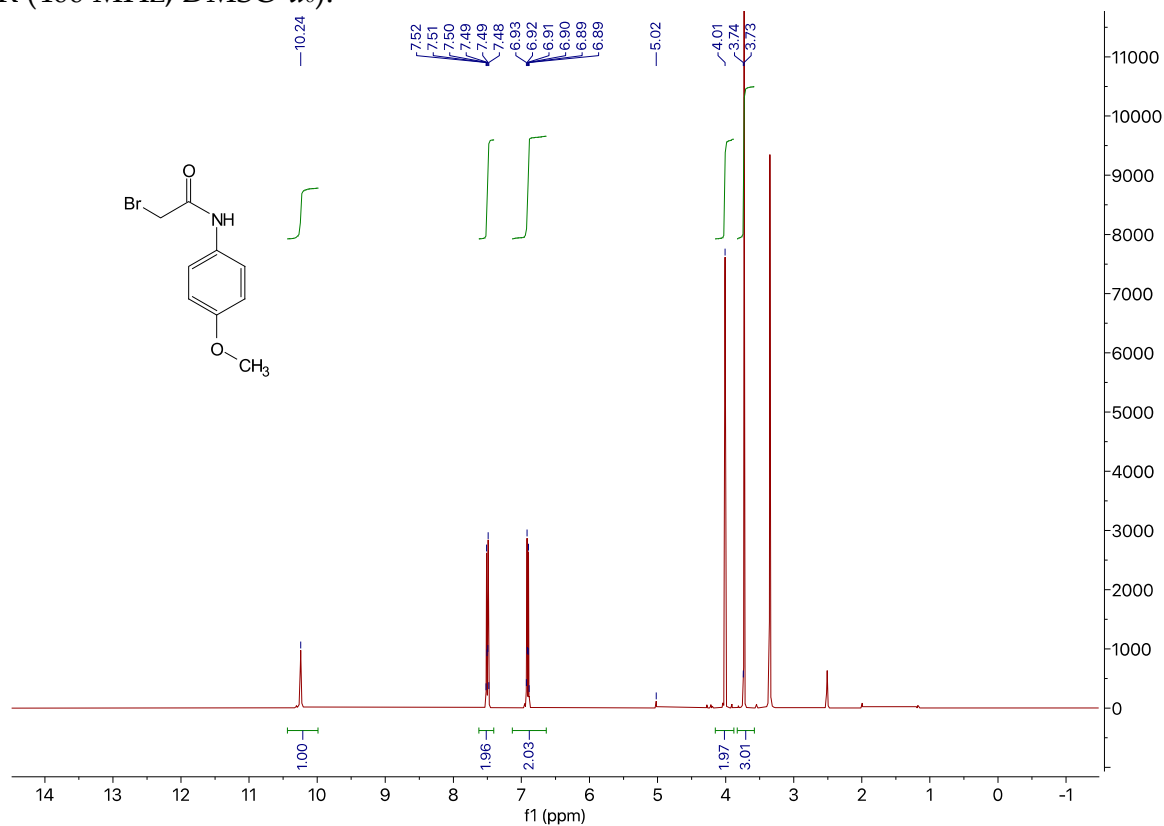

$^{13}\text{C}$  NMR (100 MHz,  $\text{DMSO}-d_6$ ):

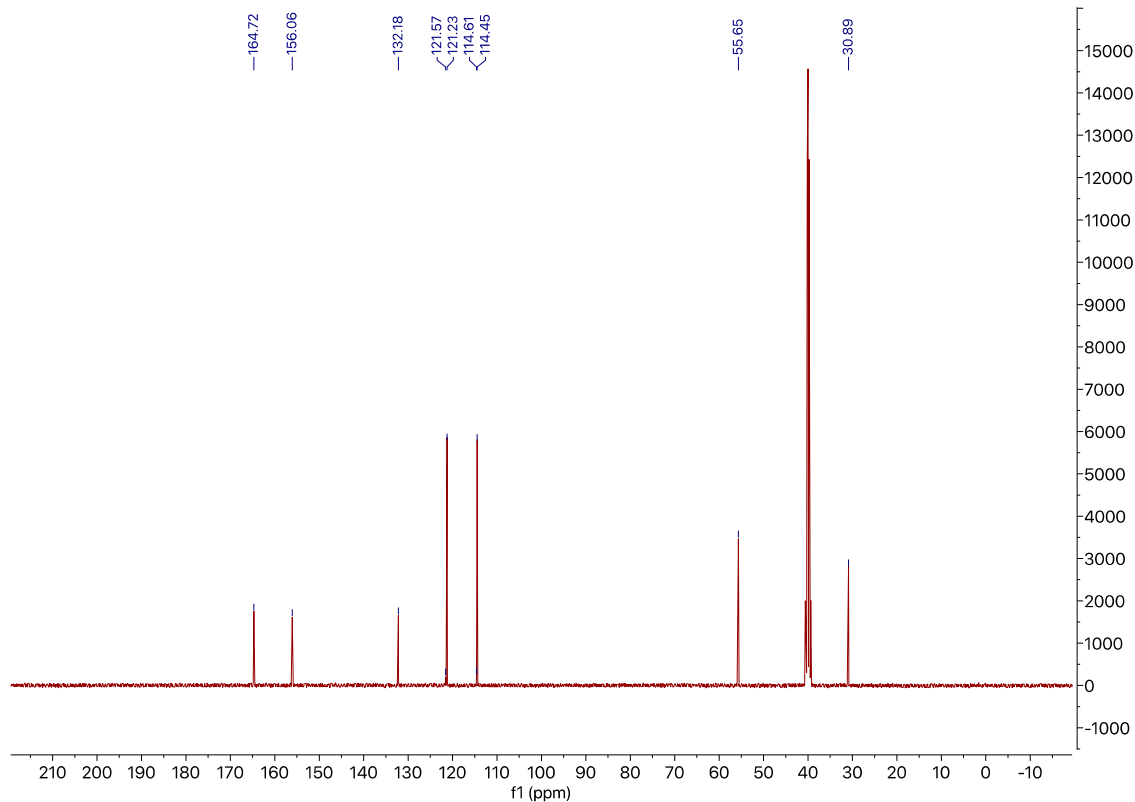

## 2-Bromo-*N*-phenylacetamide (**15b**)

$^1\text{H}$  NMR (400 MHz,  $\text{DMSO}-d_6$ ):

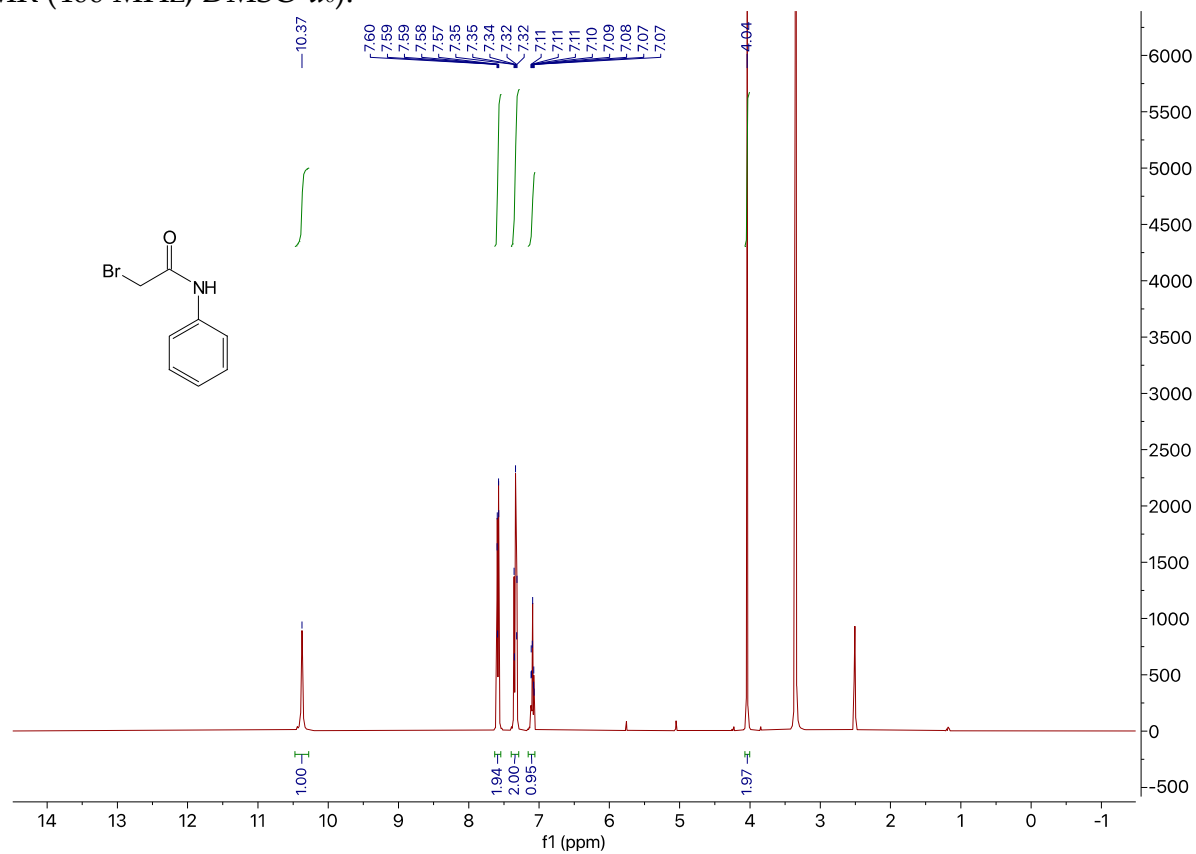

$^{13}\text{C}$  NMR (100 MHz,  $\text{DMSO}-d_6$ ):

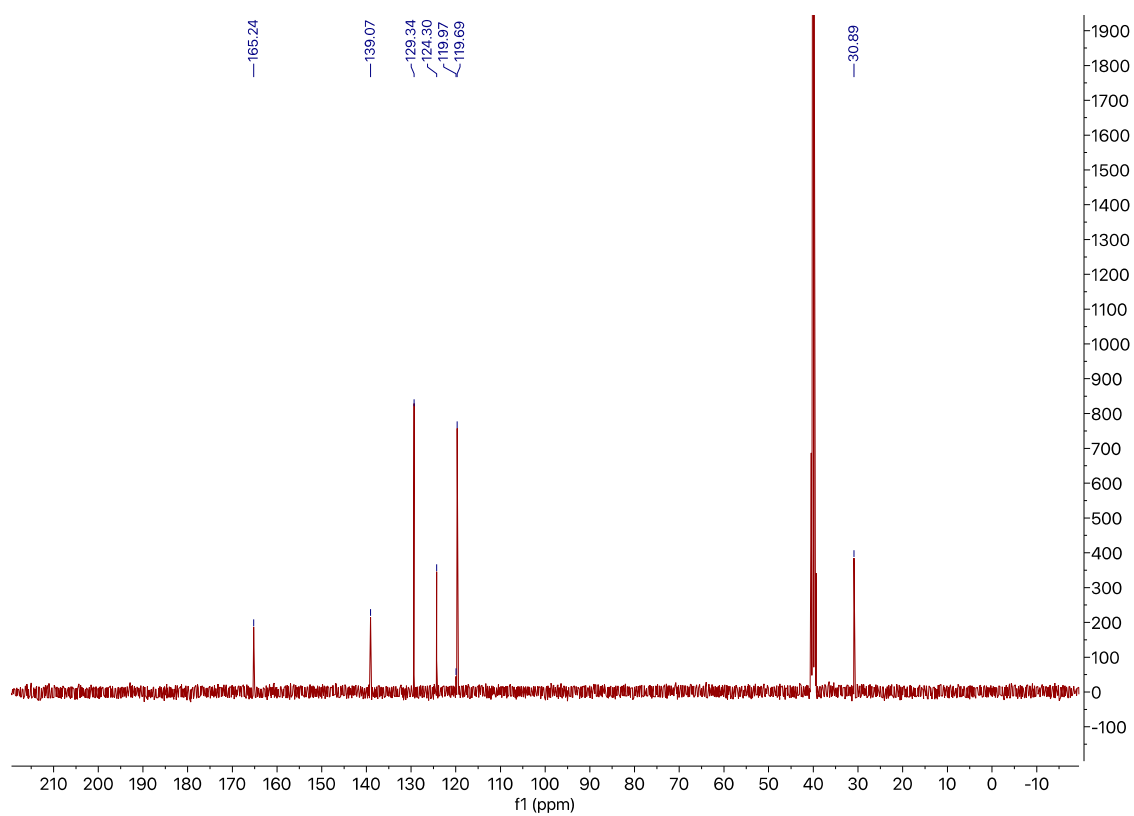

## 2-Bromo-N-(4-nitrophenyl)acetamide (**15c**)

$^1\text{H}$  NMR (400 MHz,  $\text{DMSO}-d_6$ ):

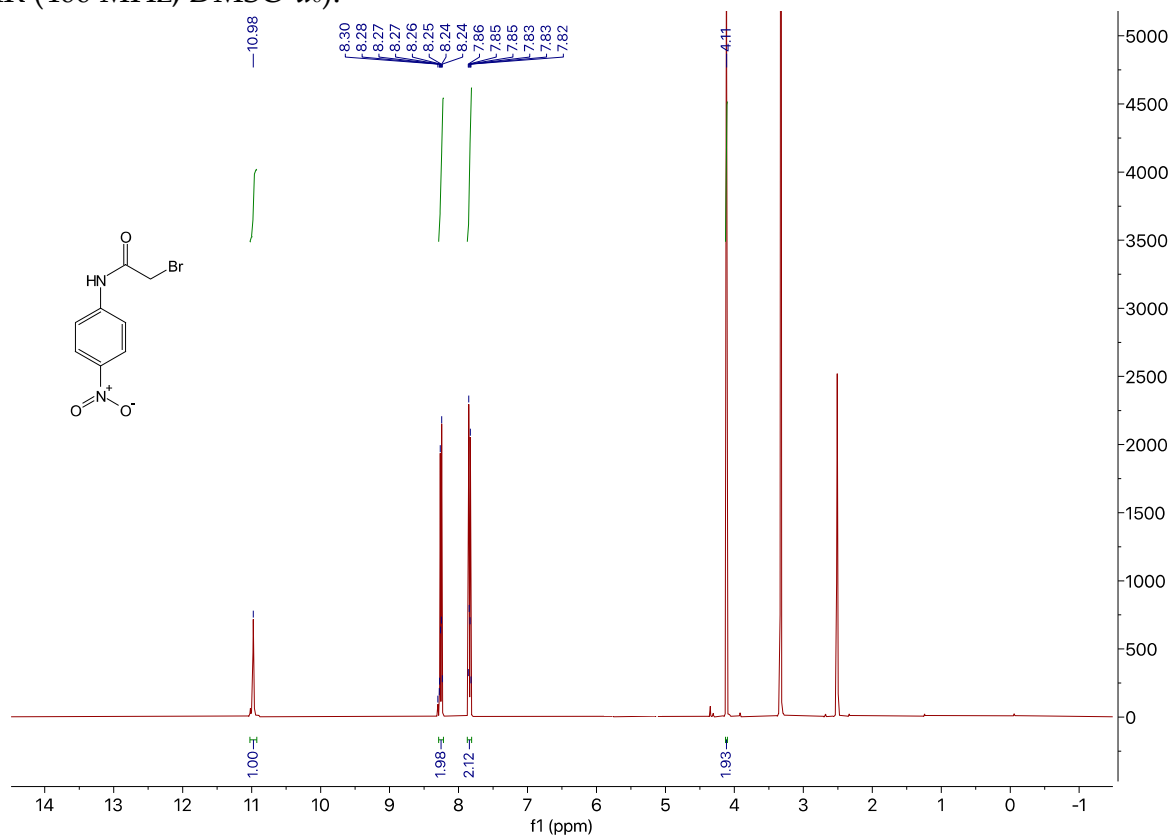

$^{13}\text{C}$  NMR (100 MHz,  $\text{DMSO}-d_6$ ):

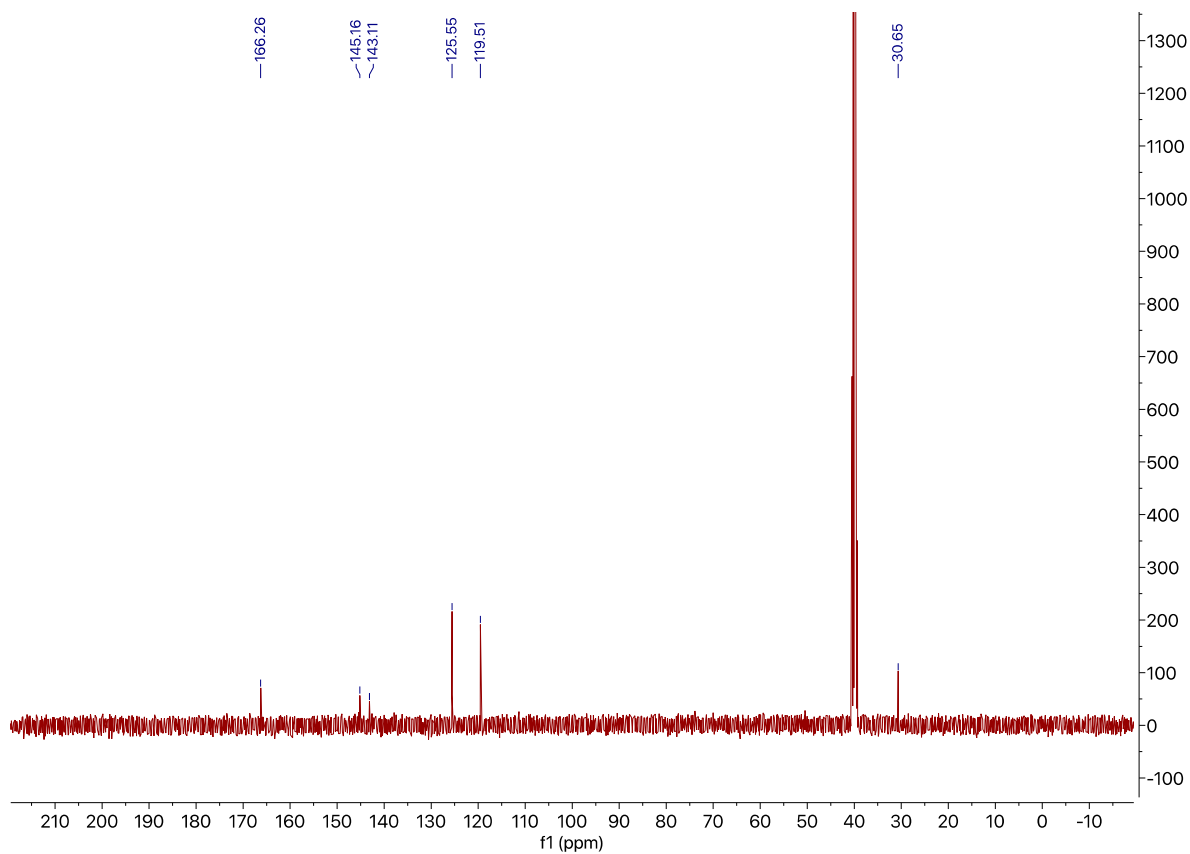



# High resolution mass spectra (HRMS) of synthesised compounds

*N*-Butyl-2-((3-cyclopropyl-4-oxo-3,4-dihydroquinazolin-2-yl)thio)acetamide (**5a**)

Full spectrum

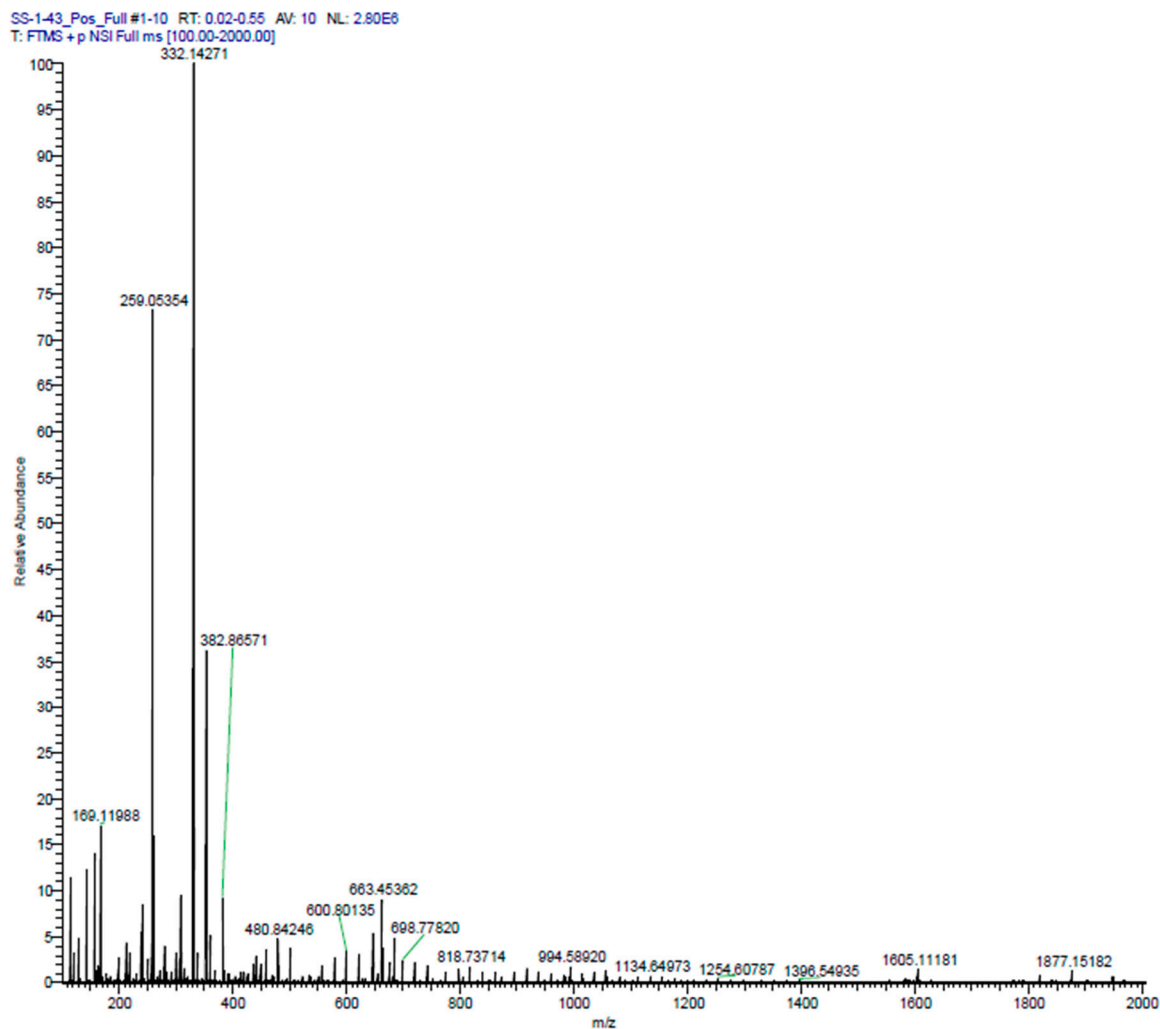

Zoomed spectrum (Top spectrum: measured mass; bottom spectrum: calculated mass)

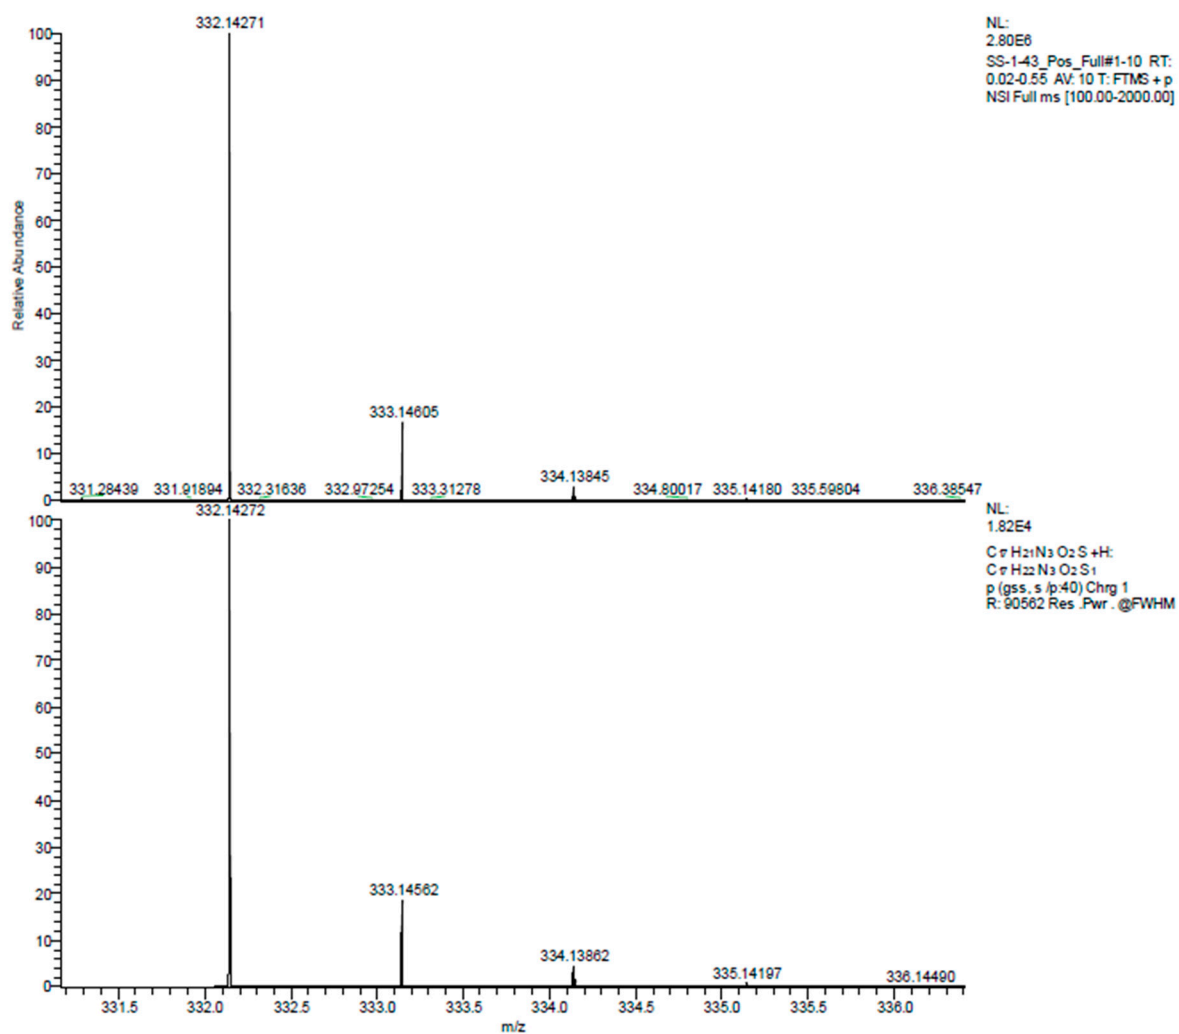

*N*-Benzyl-2-((3-cyclopropyl-4-oxo-3,4-dihydroquinazolin-2-yl)thio)acetamide (**5b**)

Full spectrum

SS-1-36\_Pos\_Full #1-9 RT: 0.02-0.48 AV: 9 NL: 2.42E8  
T: FTMS + p NSI Full ms [100.00-2000.00]

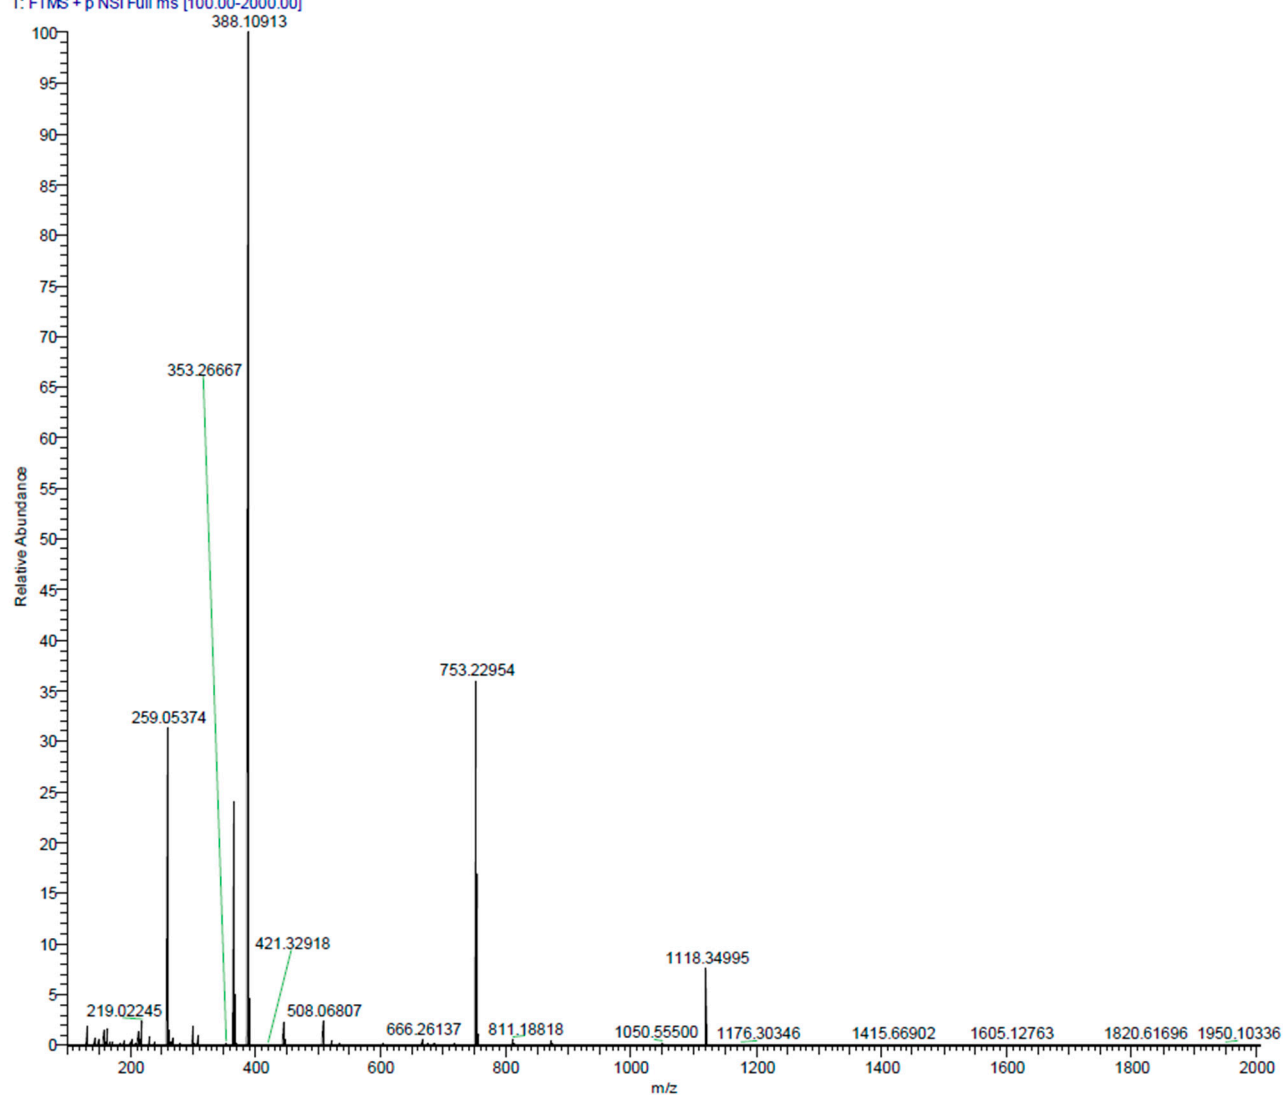

Zoomed spectrum (Top spectrum: measured mass; bottom spectrum: calculated mass)

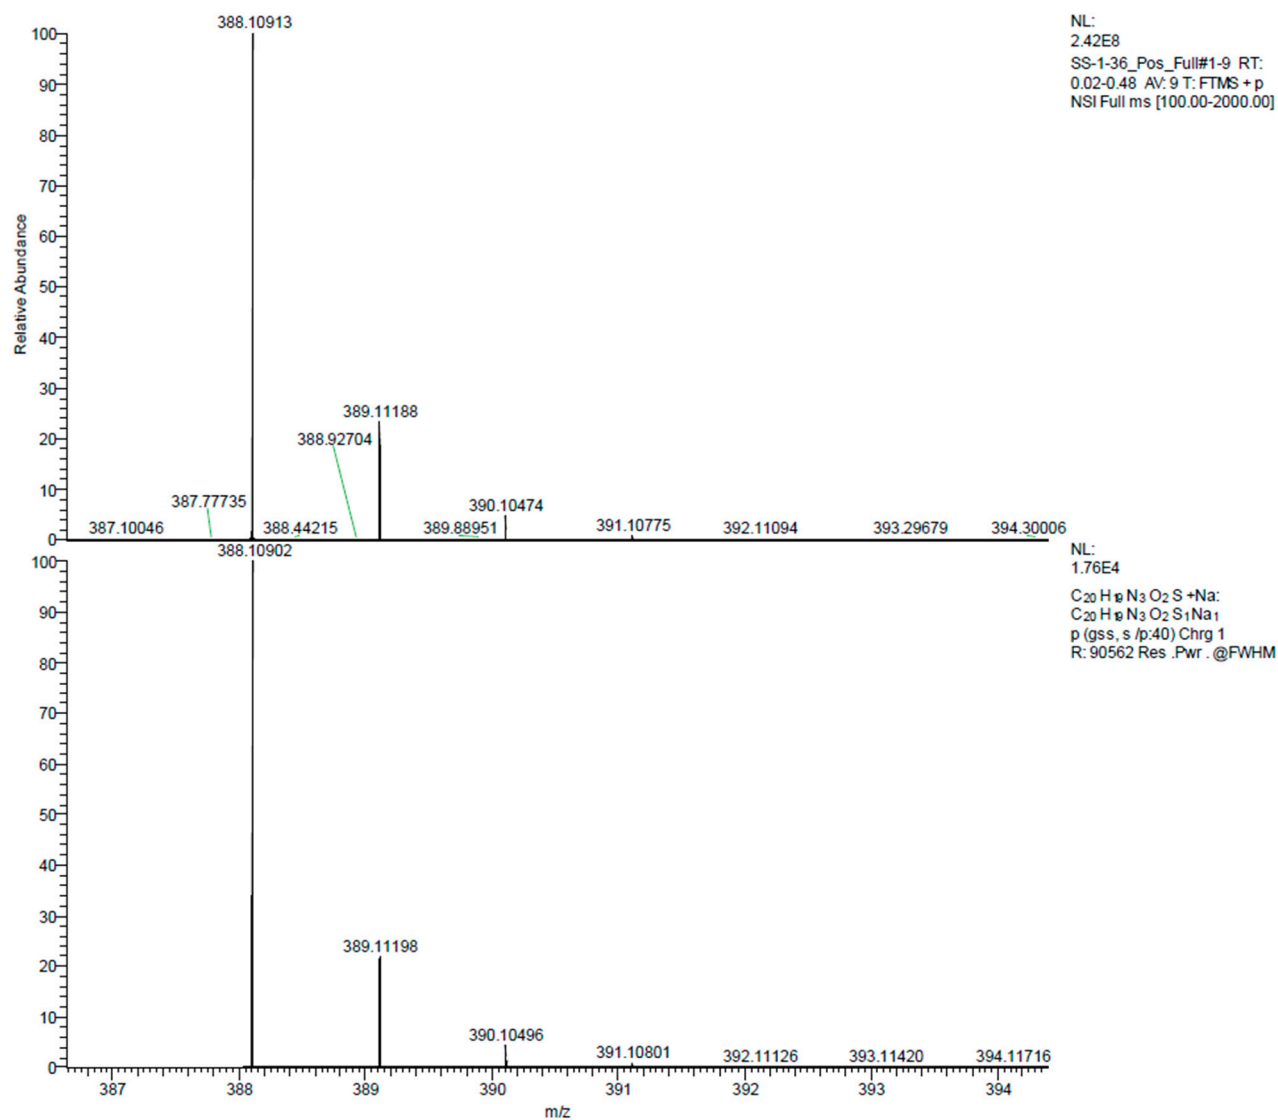

*N*-Benzyl-2-((4-oxo-3-phenyl-3,4-dihydroquinazolin-2-yl)thio)acetamide (**5c**)

Full spectrum

SS-1-37\_Pos\_Full #1-14 RT: 0.01-0.73 AV: 14 NL: 1.07E8  
T: FTMS + p NSI sid=40.00 Full ms [100.00-2000.00]

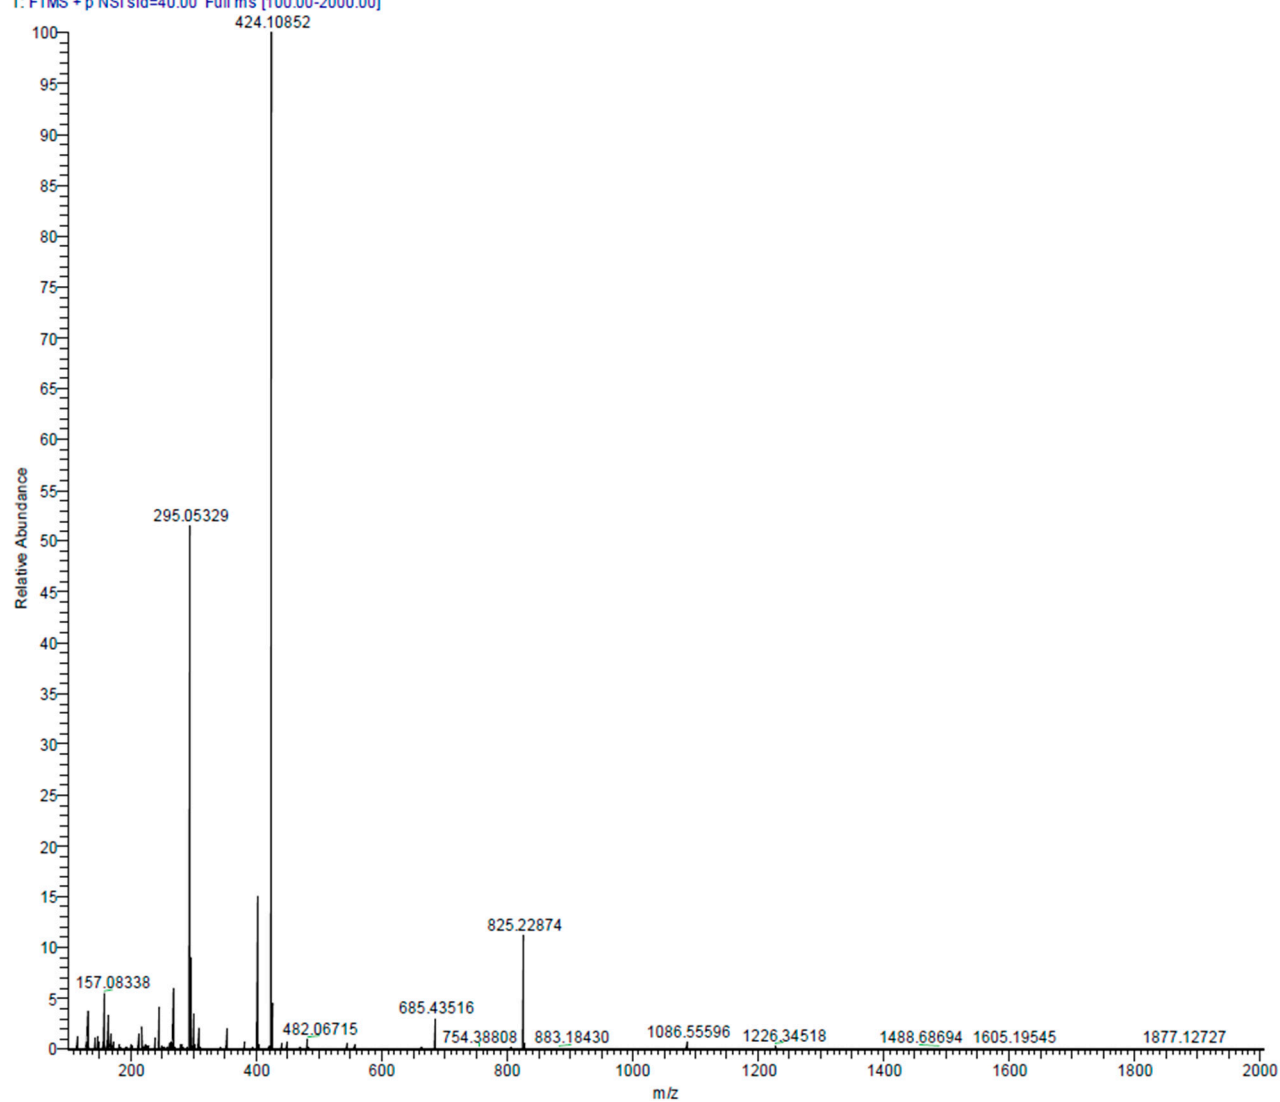

Zoomed spectrum (Top spectrum: measured mass; bottom spectrum: calculated mass)

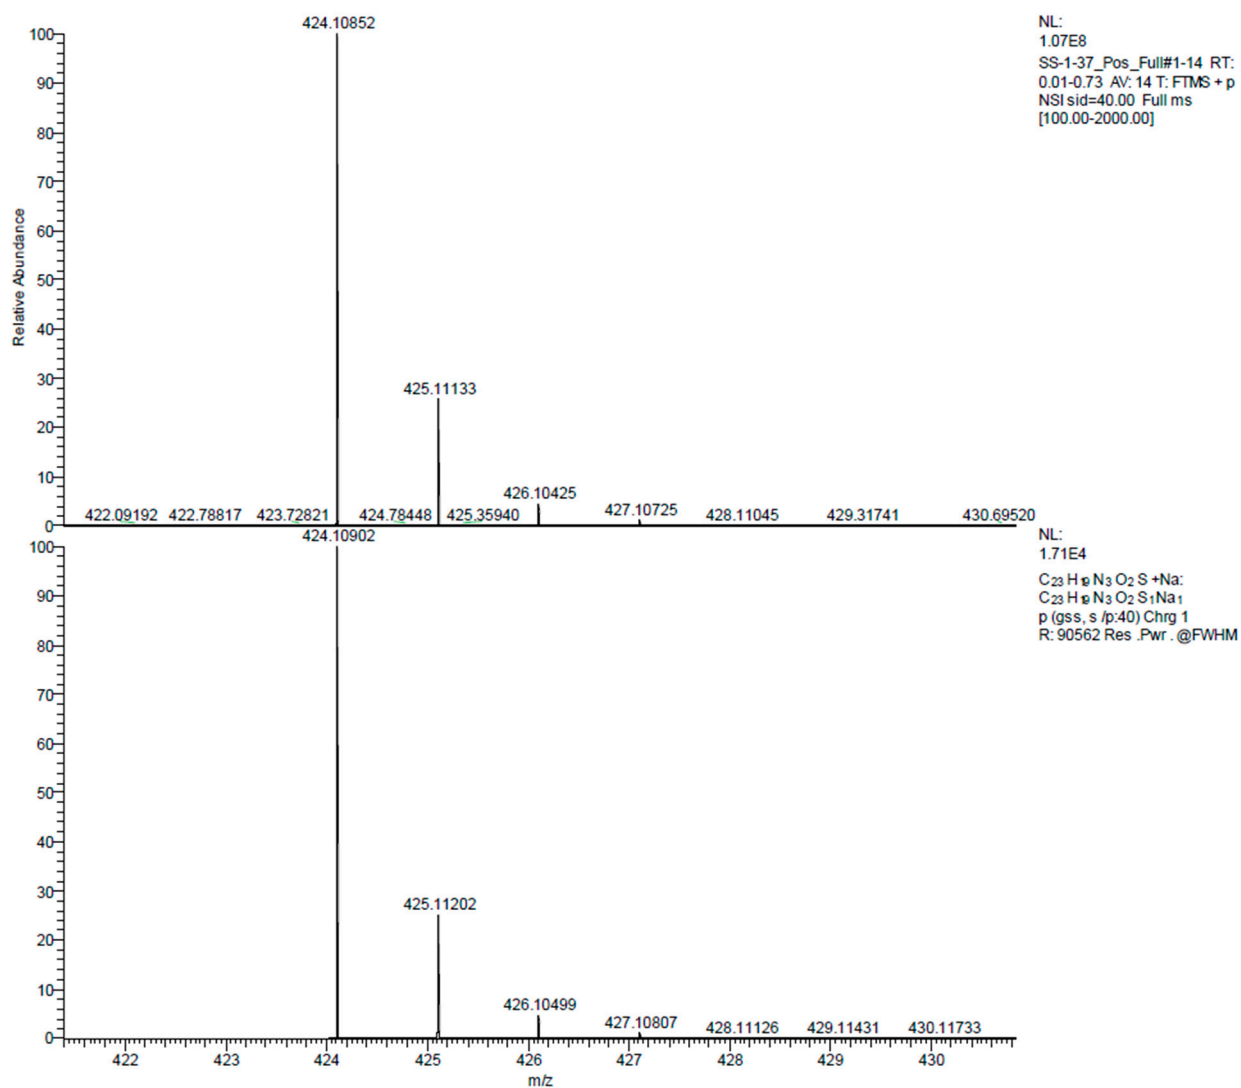

*N*-Benzyl-2-((6-chloro-3-cyclopropyl-4-oxo-3,4-dihydroquinazolin-2-yl)thio)acetamide (**5d**)

Full spectrum

SS-1-38\_Pos\_Full #1-10 RT: 0.01-0.53 AV: 10 NL: 1.51E8  
T: FTMS + p NSI Full ms [100.00-2000.00]

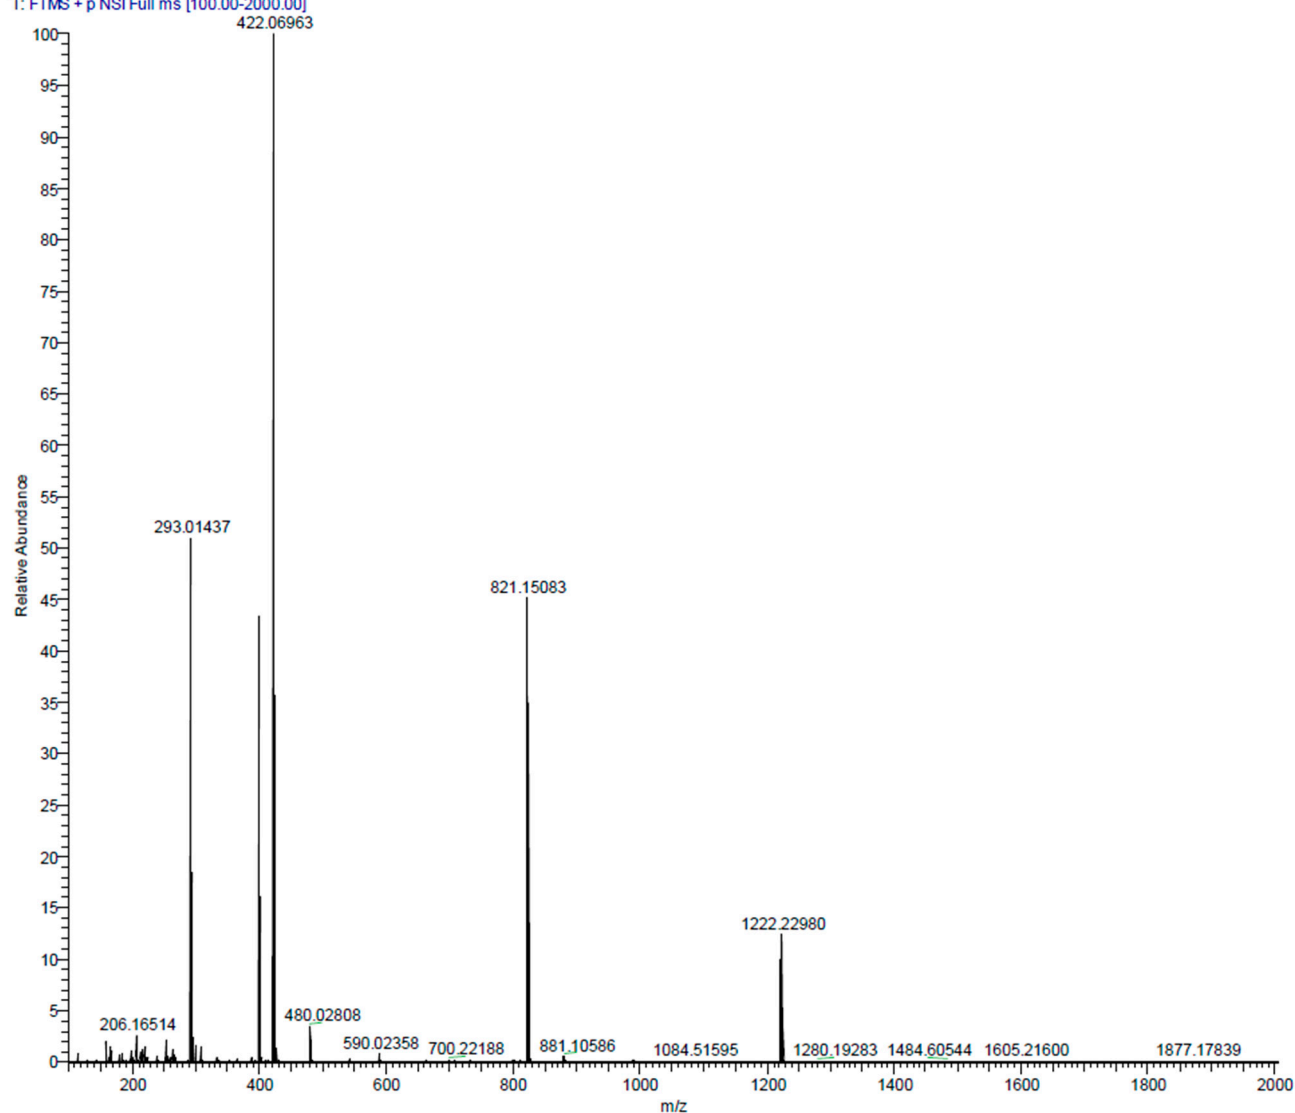

Zoomed spectrum (Top spectrum: measured mass; bottom spectrum: calculated mass)

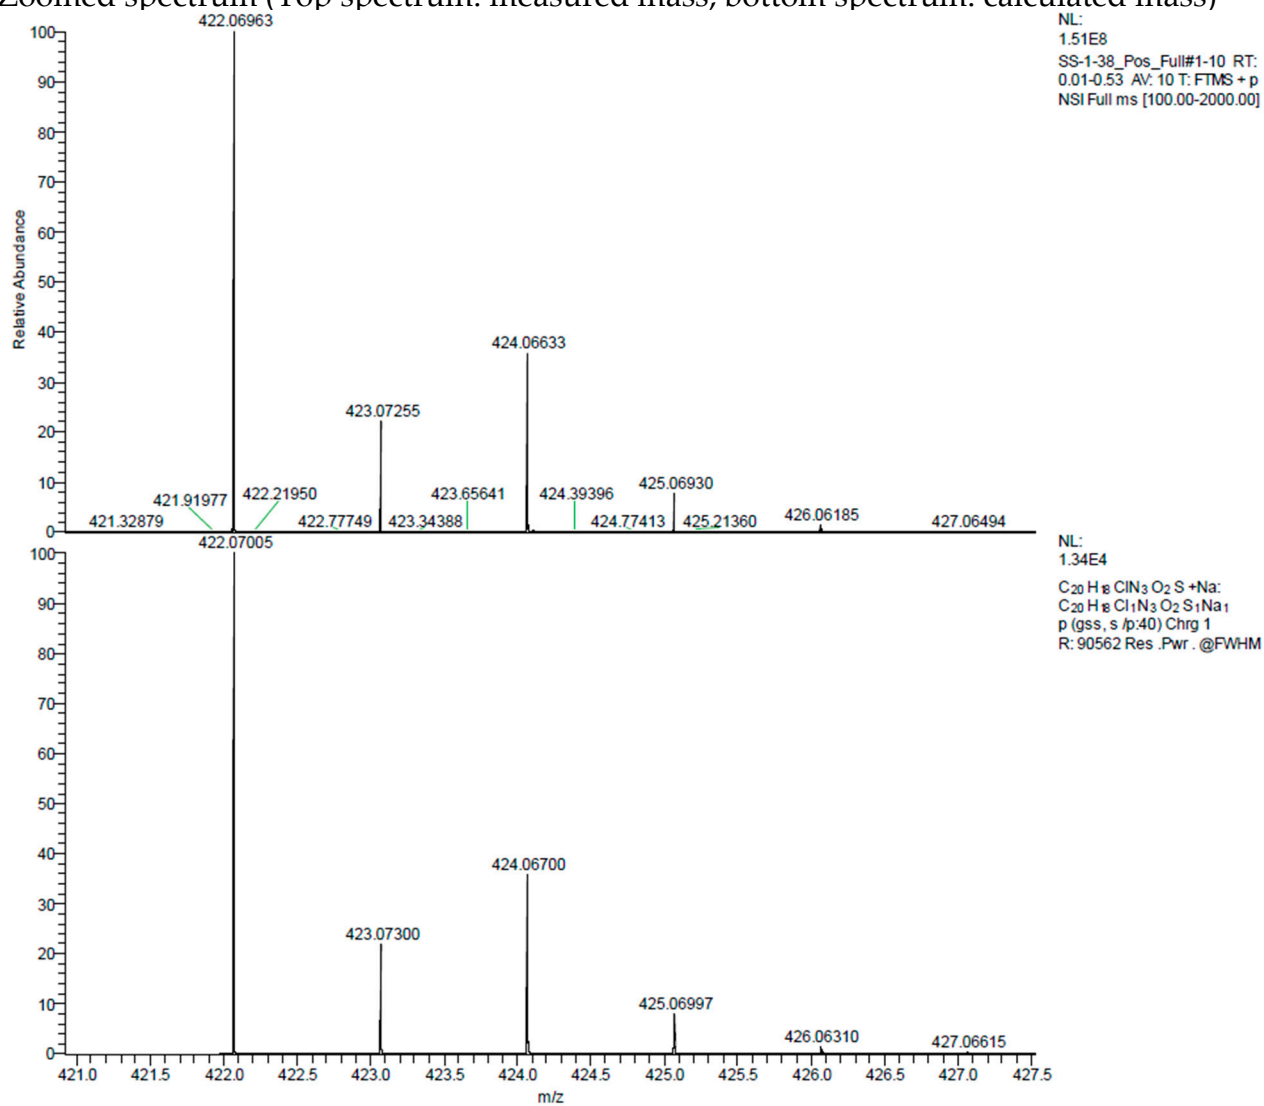



*N*-(4-Methoxyphenyl)-3-((4-oxo-3-phenyl-3,4-dihydroquinazolin-2-yl)thio)propenamide (**5f**)

Full spectrum

SS-1-47\_Pos\_Full #1-10 RT: 0.02-0.55 AV: 10 NL: 7.80E7  
T: FTMS + p NSI Full ms [100.00-2000.00]

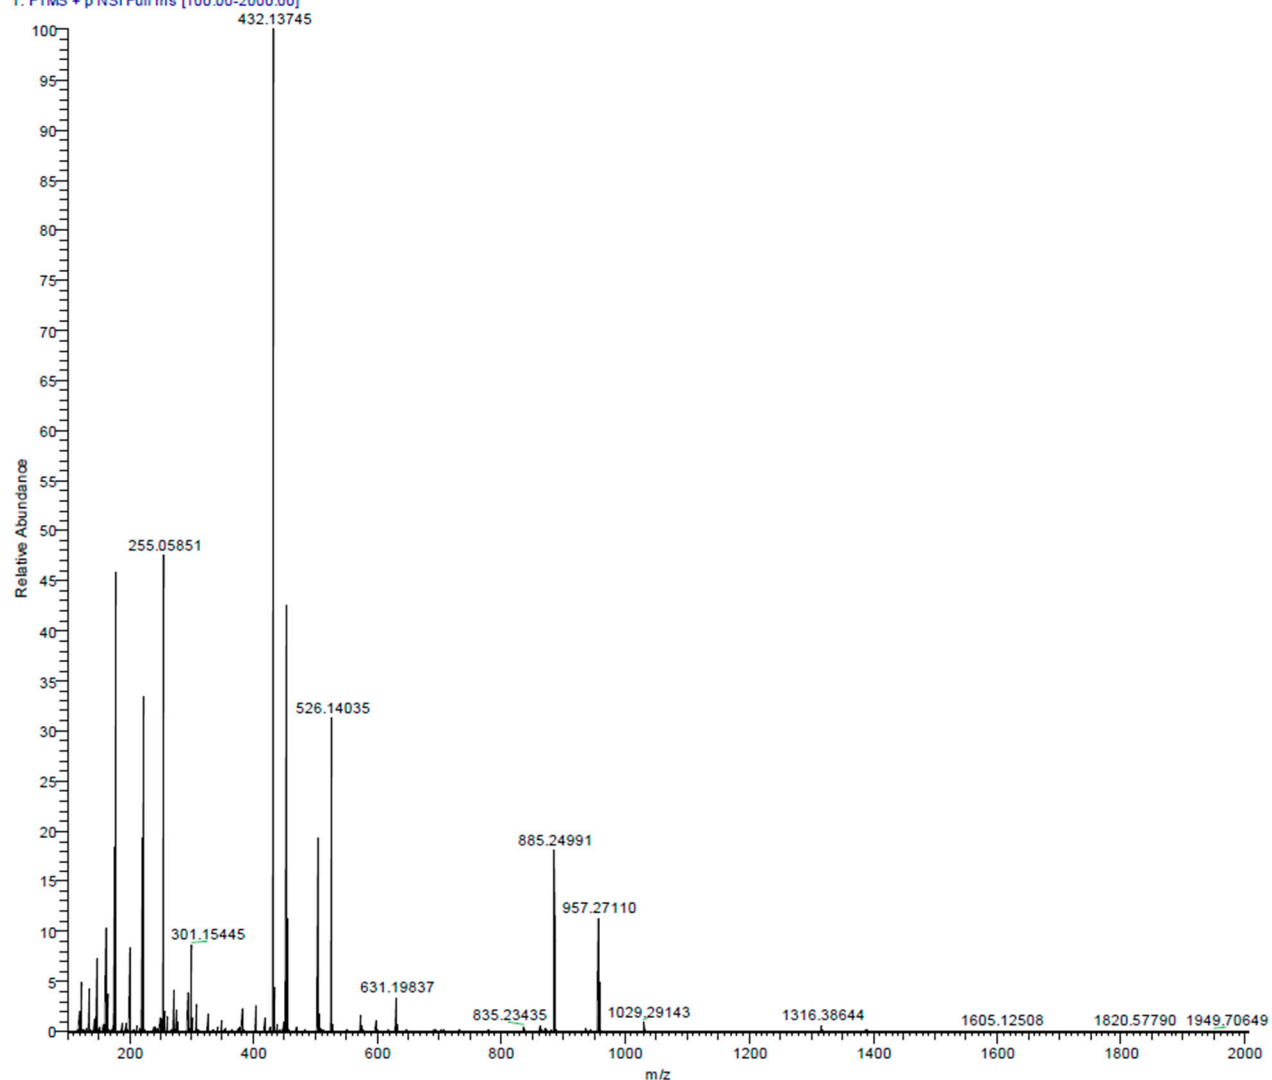

Zoomed spectrum (Top spectrum: measured mass; bottom spectrum: calculated mass)

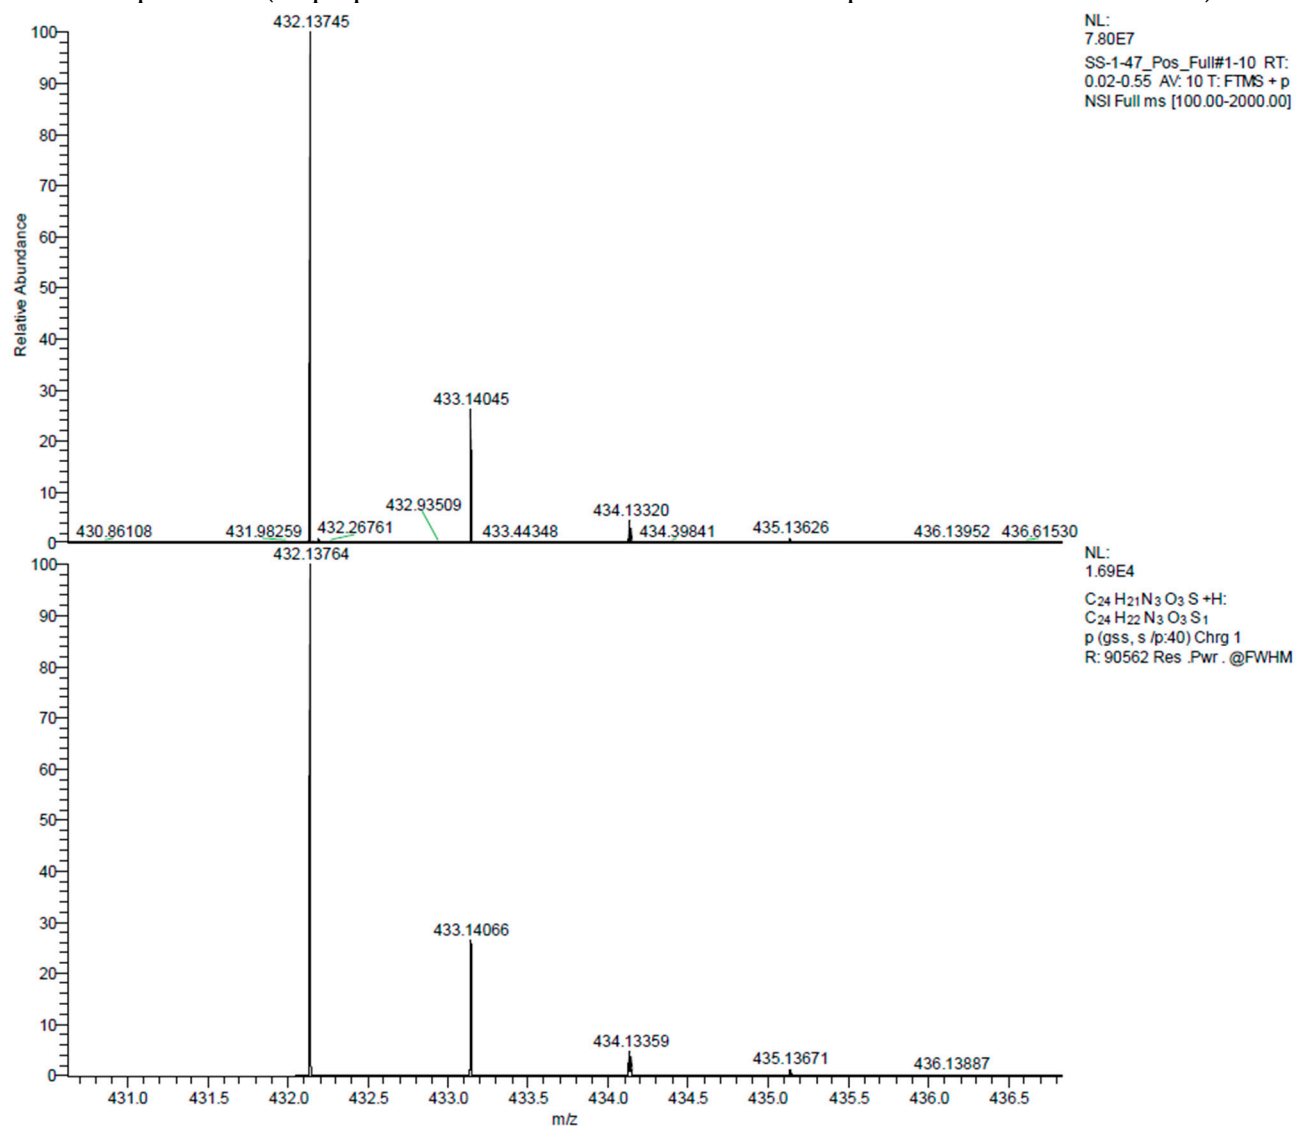

3-Cyclopropyl-2-((2-morpholino-2-oxoethyl)thio)quinazolin-4(3H)-one  
(5g)

Full spectrum

SS-1-44\_Pos\_Full #1-9 RT: 0.00-0.46 AV: 9 NL: 3.02E8  
T: FTMS + p NSI Full ms [100.00-2000.00]

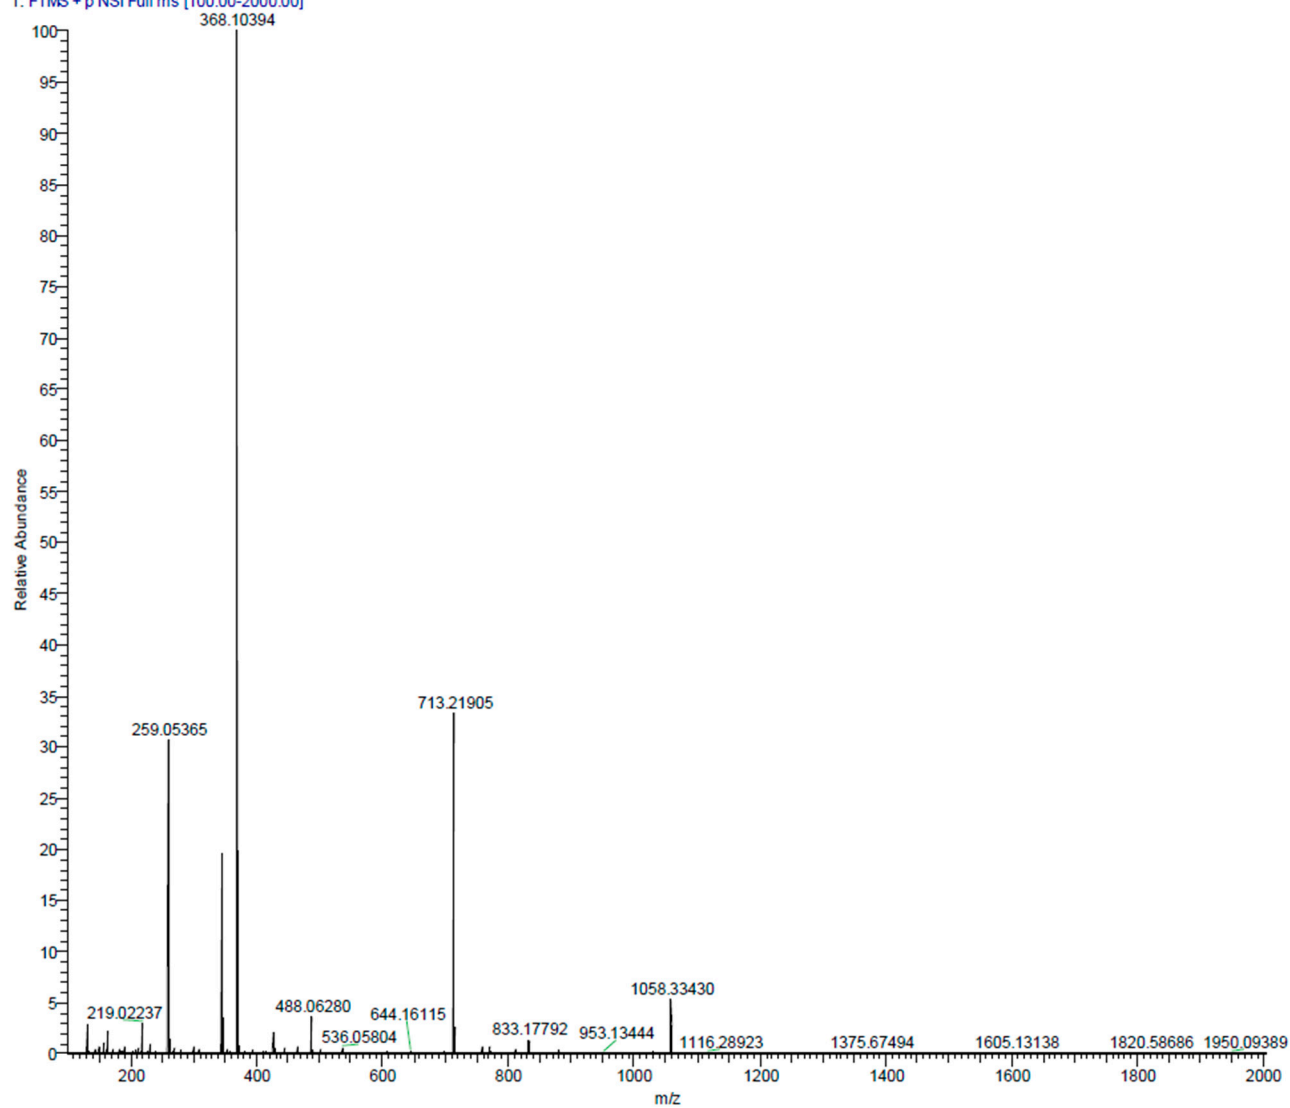

Zoomed spectrum (Top spectrum: measured mass; bottom spectrum: calculated mass)

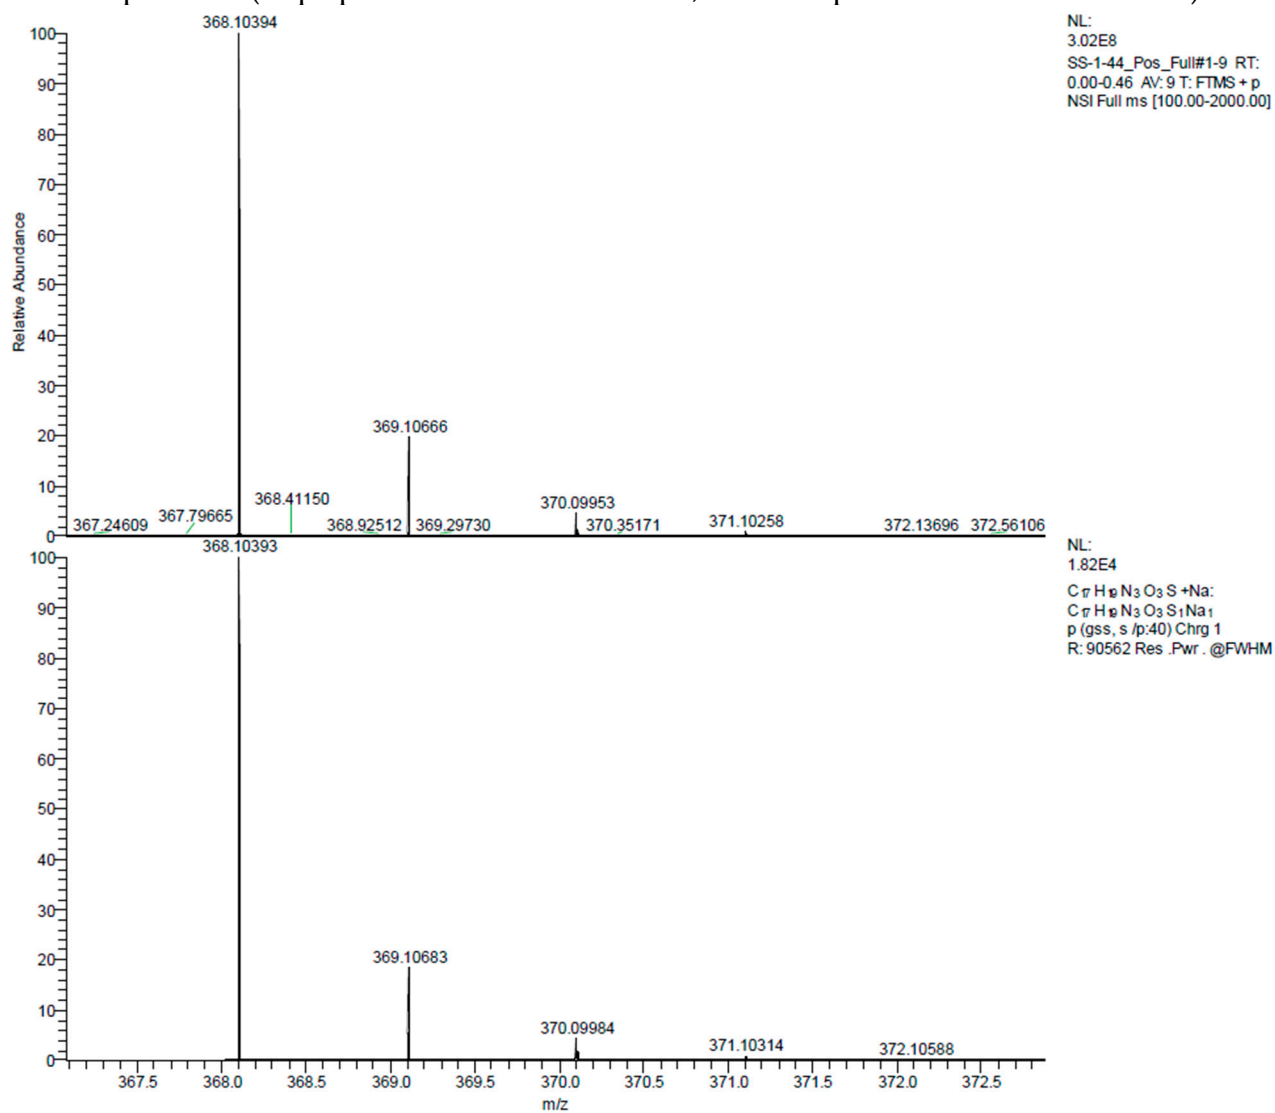

2-((2-Morpholino-2-oxoethyl)thio)-3-phenylquinazolin-4(3H)-one (**5h**)

Full spectrum

SS-1-45\_Pos\_Full #1-11 RT: 0.02-0.61 AV: 11 NL: 6.92E7  
T: FTMS + p NSI Full ms [100.00-2000.00]

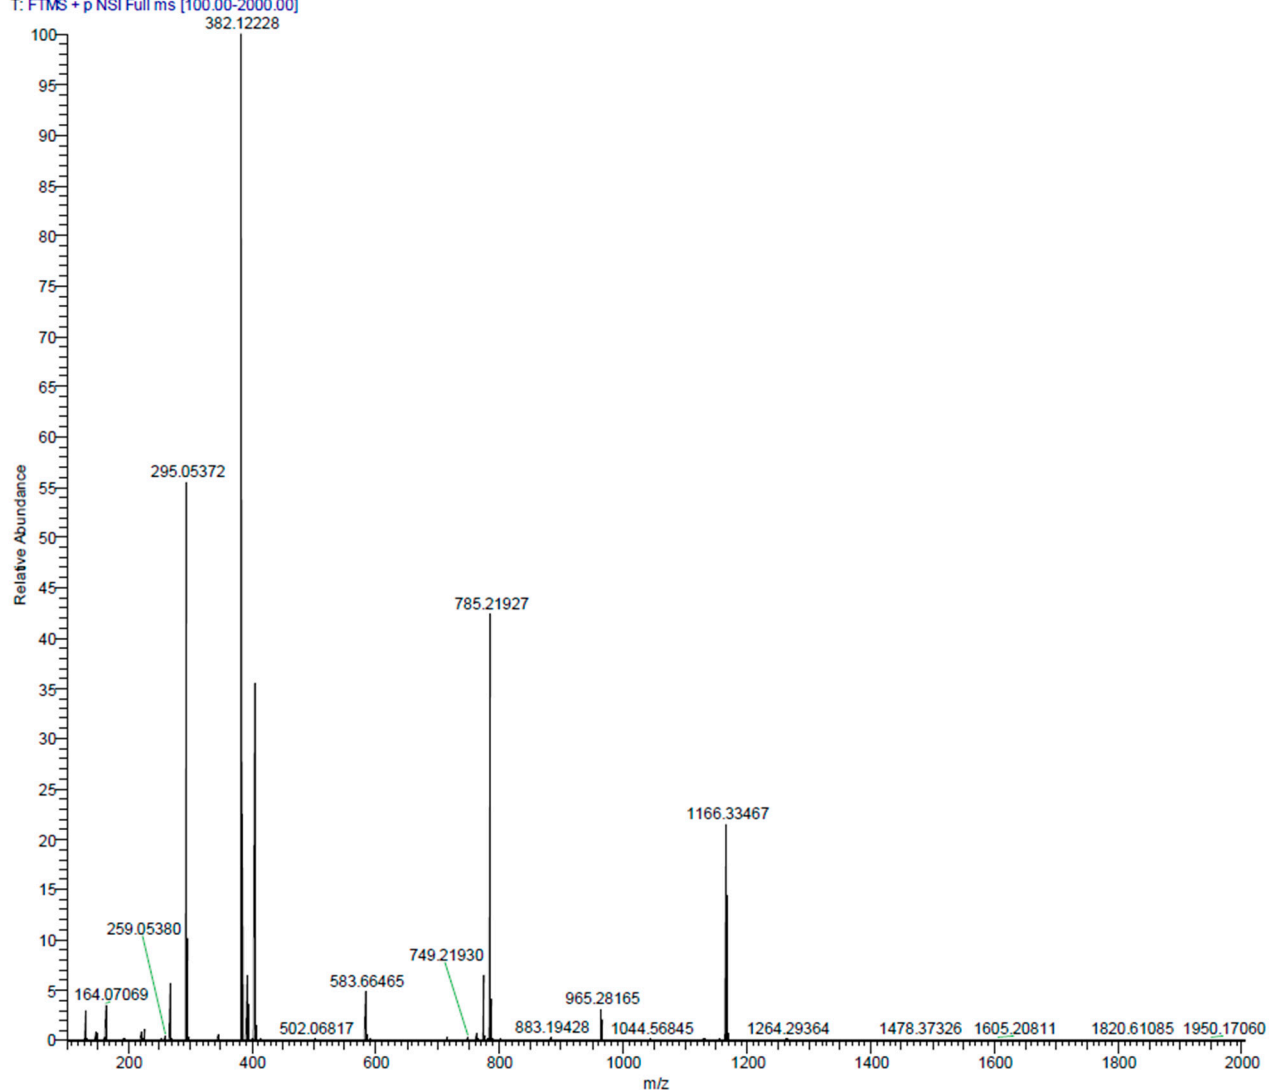

Zoomed spectrum (Top spectrum: measured mass; bottom spectrum: calculated mass)

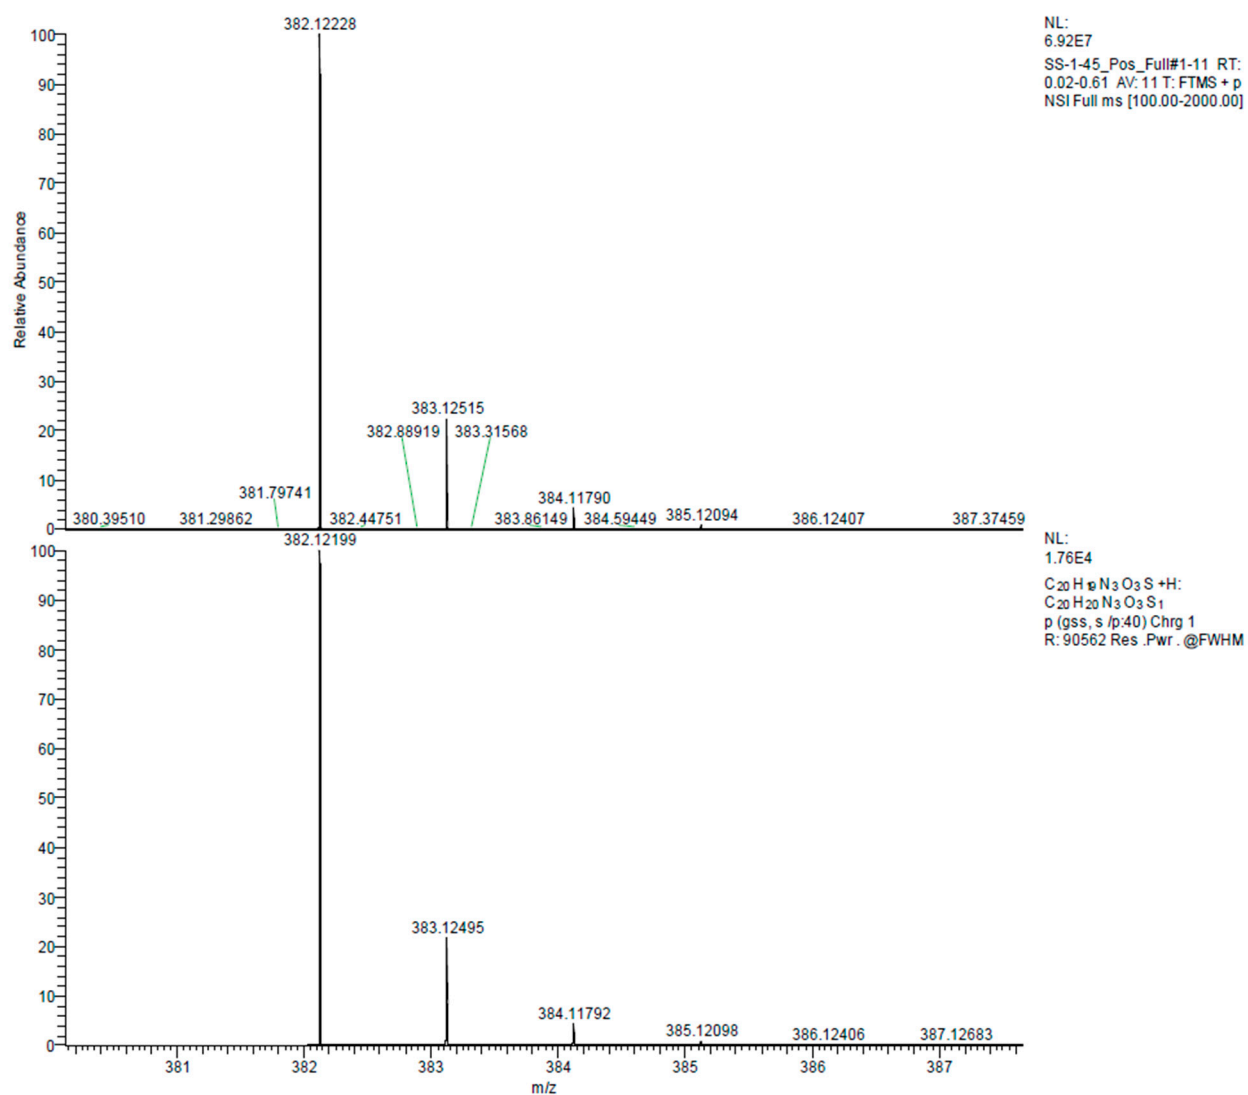

2-((2-Morpholino-2-oxoethyl)thio)quinazolin-4(3H)-one (**5i**)

Full spectrum

SS-1-60\_Pos\_Full #1-10 RT: 0.02-0.54 AV: 10 NL: 2.42E8  
T: FTMS + p NSI Full ms [100.00-2000.00]

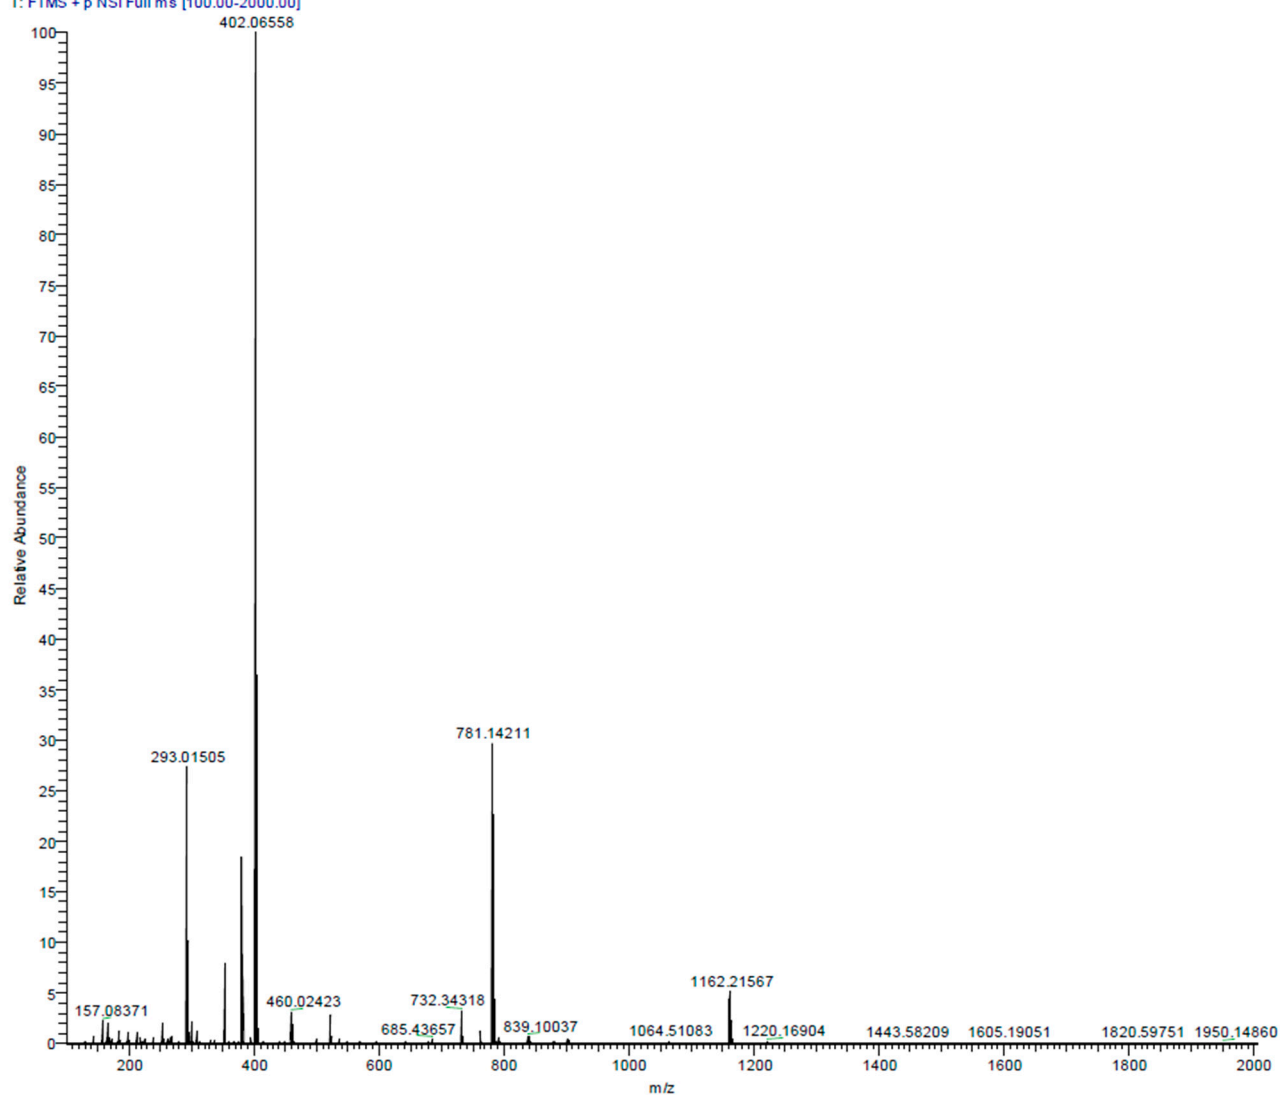

Zoomed spectrum (Top spectrum: measured mass; bottom spectrum: calculated mass)

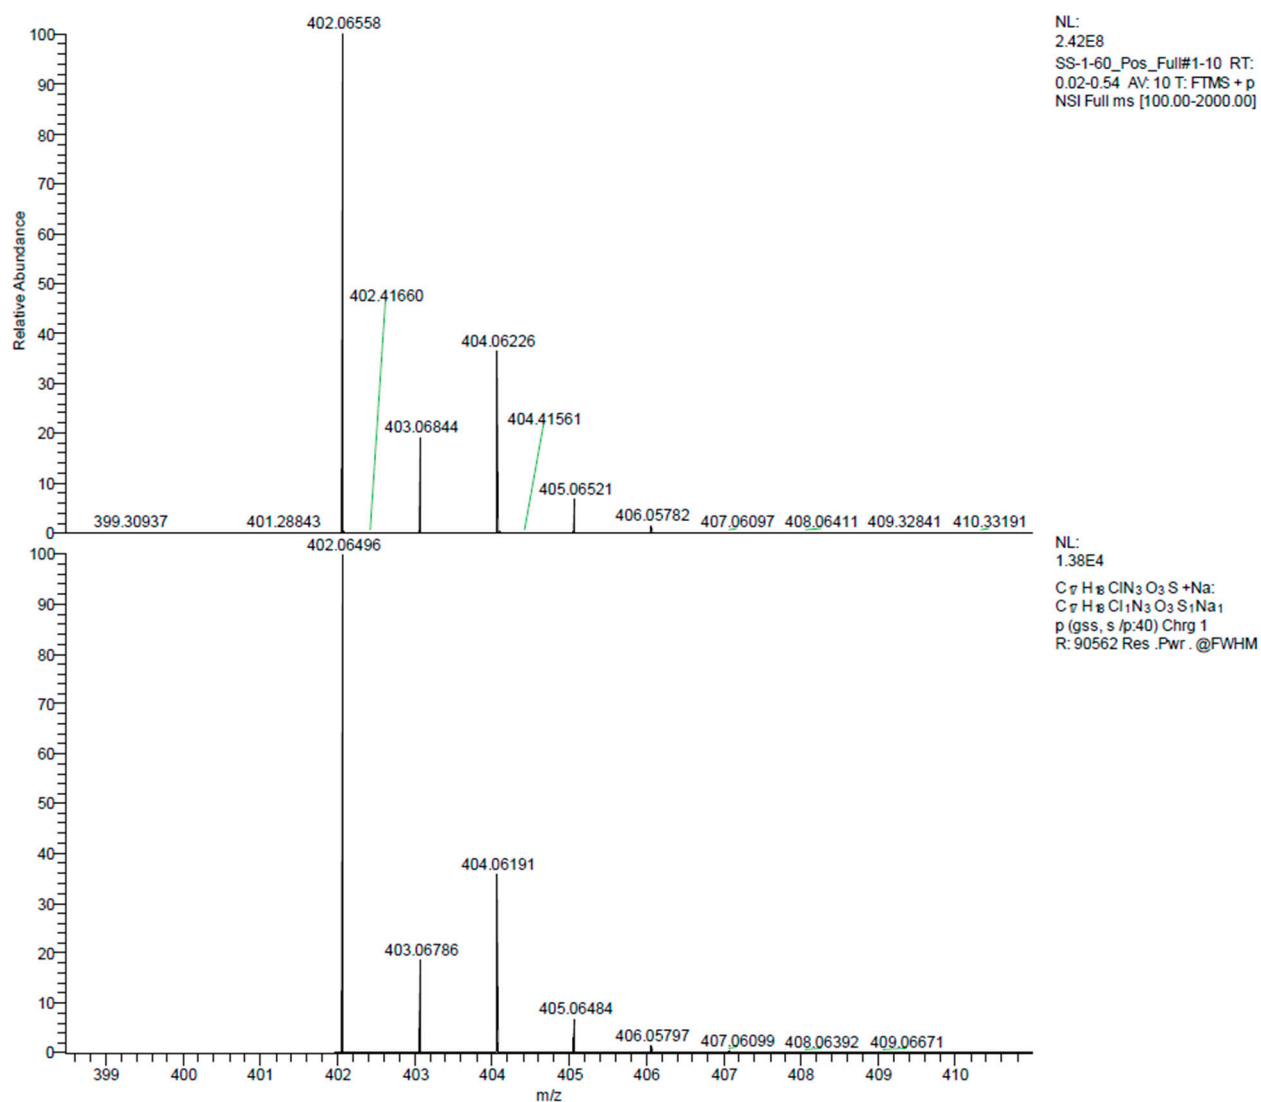



*N*-(4-Methoxyphenyl)-2-((4-oxo-3-phenyl-3,4-dihydroquinazolin-2-yl)thio)acetamide (**5j**)

Full spectrum

SS-1-41\_Pos\_Full #11-21 RT: 0.61-1.18 AV: 11 NL: 7.44E7  
T: FTMS + p NSI Full ms [100.00-2000.00]

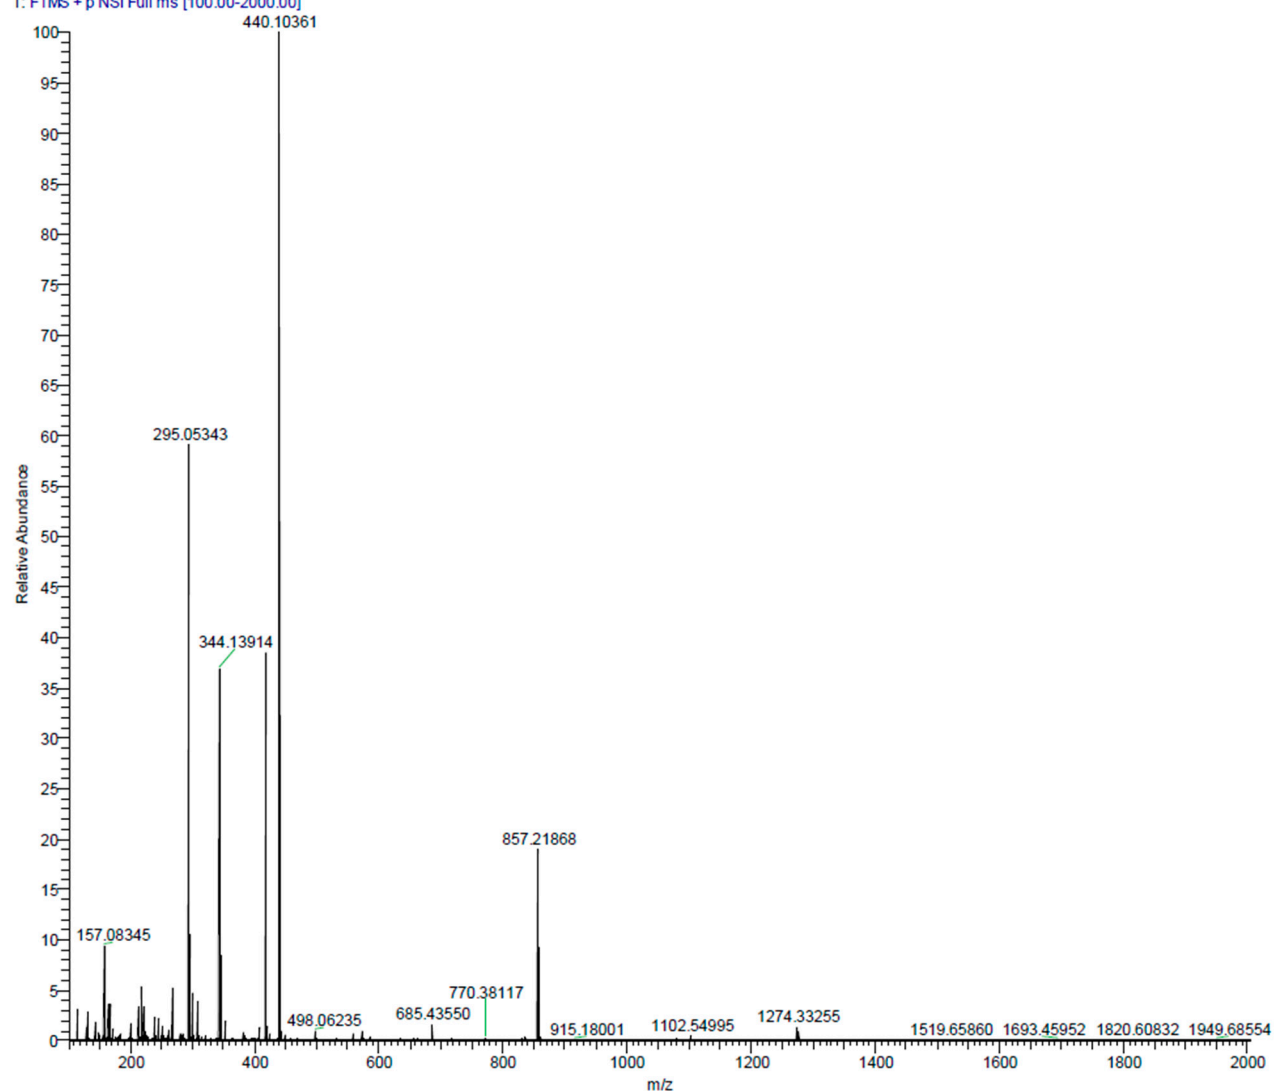

Zoomed spectrum (Top spectrum: measured mass; bottom spectrum: calculated mass)

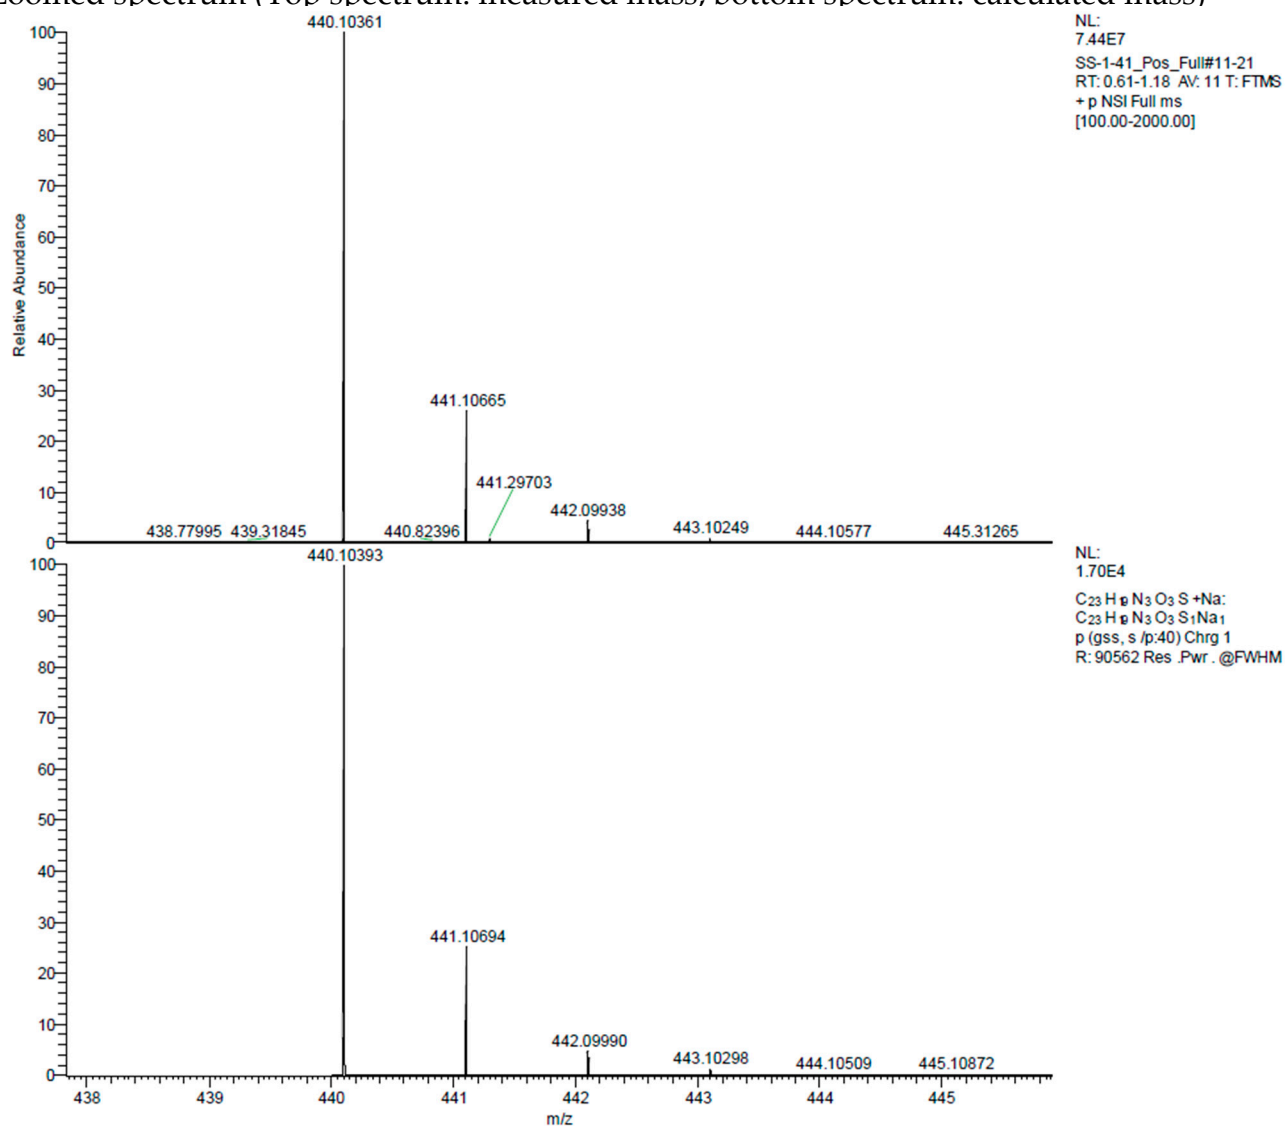

2-((6-Chloro-3-cyclopropyl-4-oxo-3,4-dihydroquinazolin-2-yl)thio)-N-(4-methoxyphenyl)acetamide (**5k**)

Full spectrum

SS-1-42\_Pos\_Full #1-9 RT: 0.02-0.48 AV: 9 NL: 1.75E7  
T: FTMS + p NSI Full ms [100.00-2000.00]

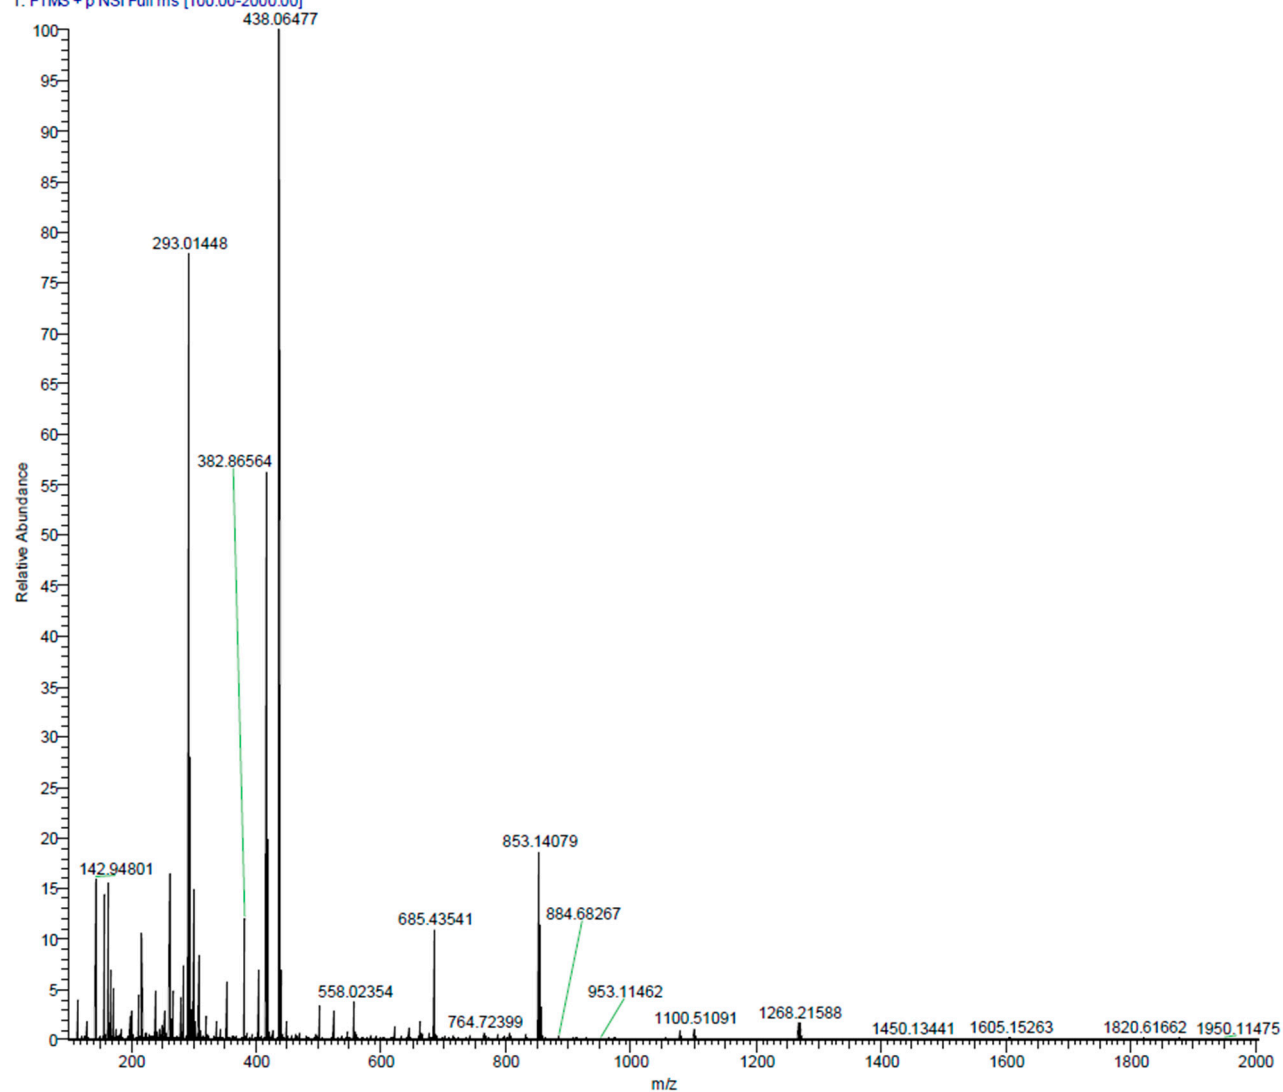

Zoomed spectrum (Top spectrum: measured mass; bottom spectrum: calculated mass)

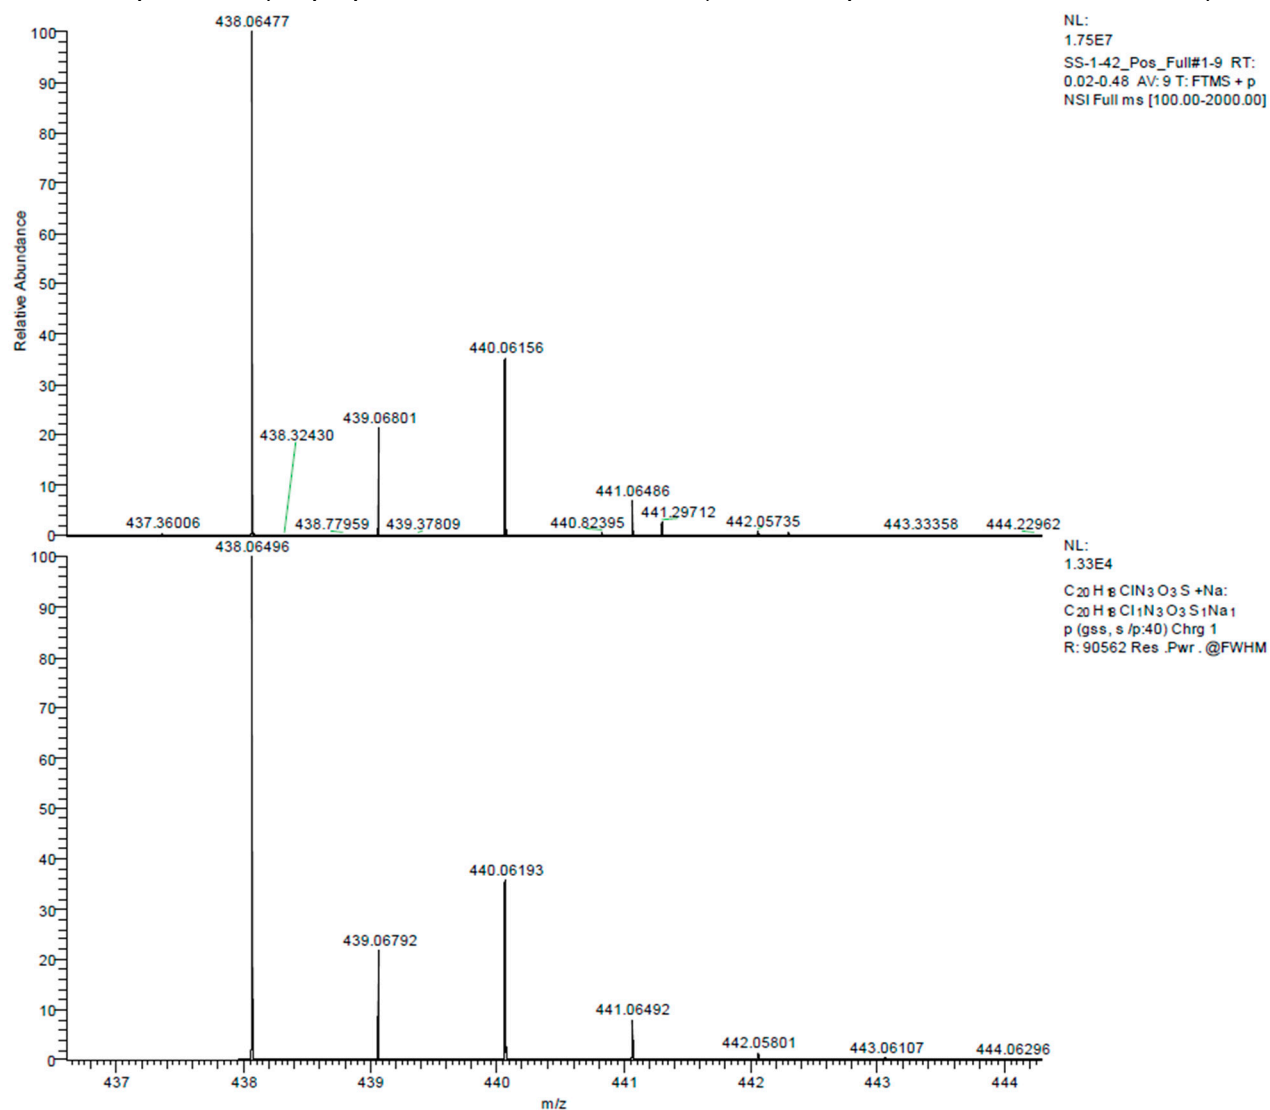

2-(4-(((3-Cyclopropyl-4-oxo-3,4-dihydroquinazolin-2-yl)thio)methyl)-1*H*-1,2,3-triazol-1-yl)-*N*-phenylacetamide (**6a**)

Full spectrum

SS-1-66\_Pos\_Full #1-18 RT: 0.01-1.00 AV: 18 NL: 6.35E7  
T: FTMS + p NSI Full ms [100.00-2000.00]

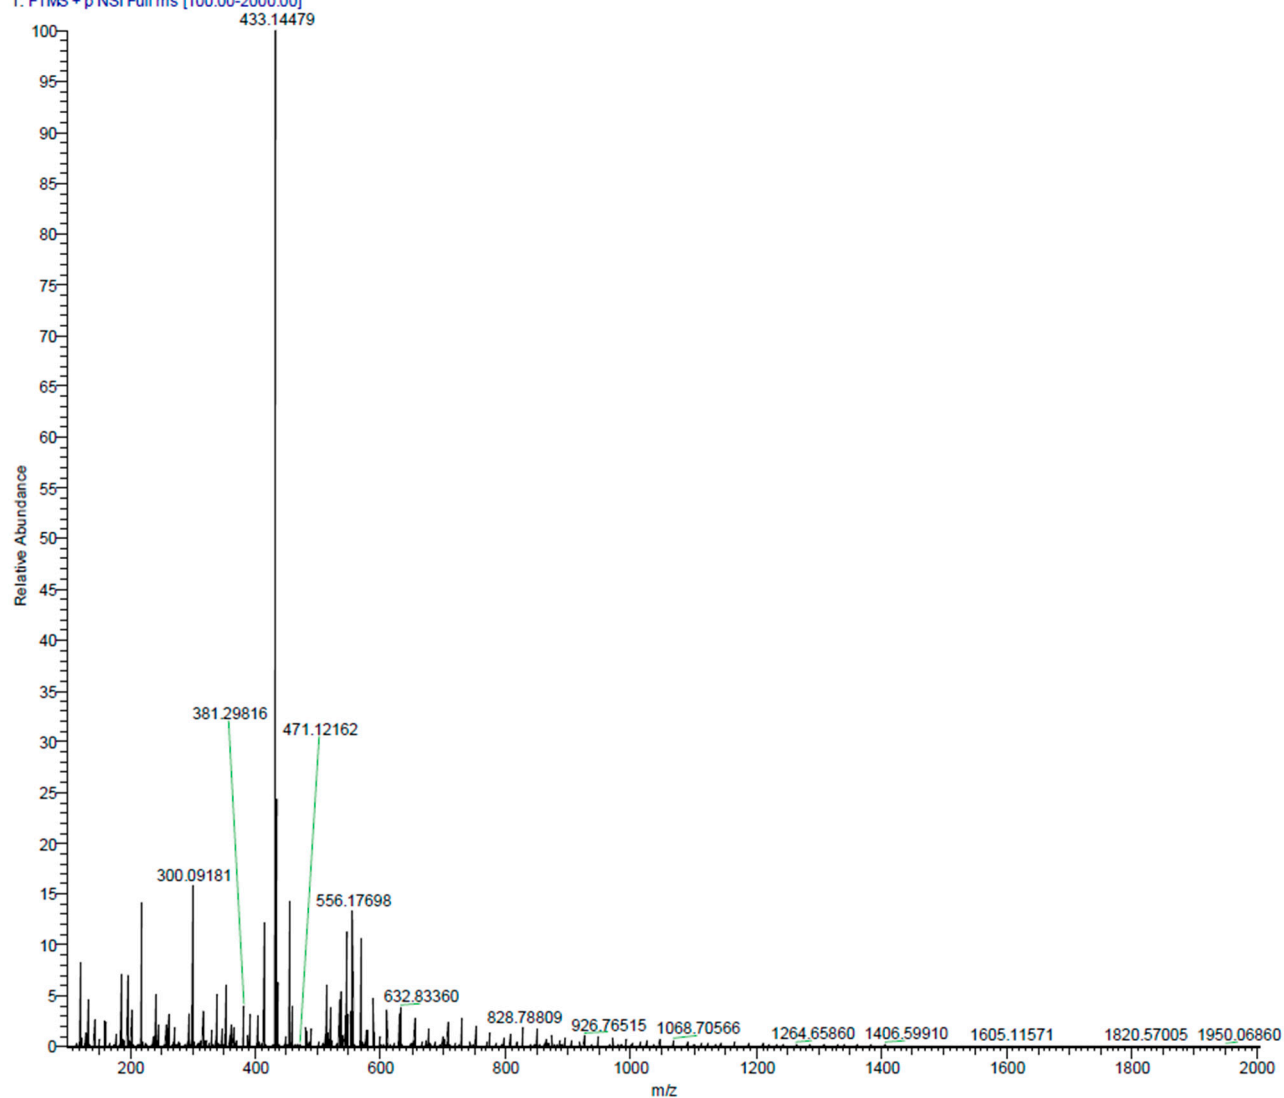

Zoomed spectrum (Top spectrum: measured mass; bottom spectrum: calculated mass)

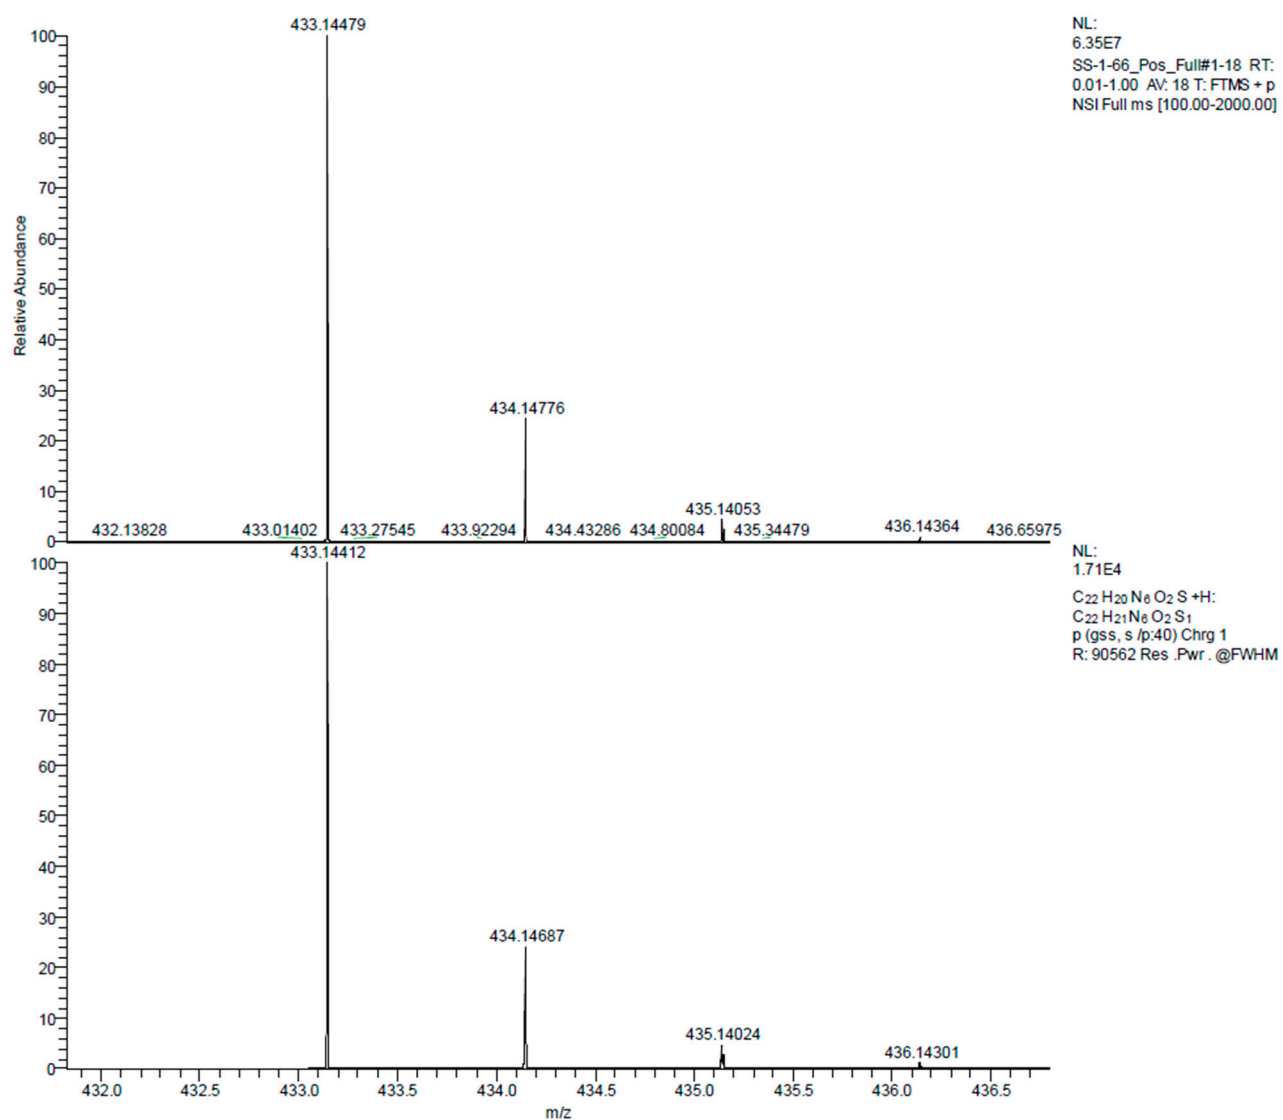

2-(4-(((3-Cyclopropyl-4-oxo-3,4-dihydroquinazolin-2-yl)thio)methyl)-1*H*-1,2,3-triazol-1-yl)-*N*-(4-methoxyphenyl)acetamide (**6b**)

Full spectrum

SS-1-56\_Pos\_Full #1-18 RT: 0.02-1.02 AV: 18 NL: 1.52E8  
T: FTMS + p NSI Full ms [100.00-2000.00]

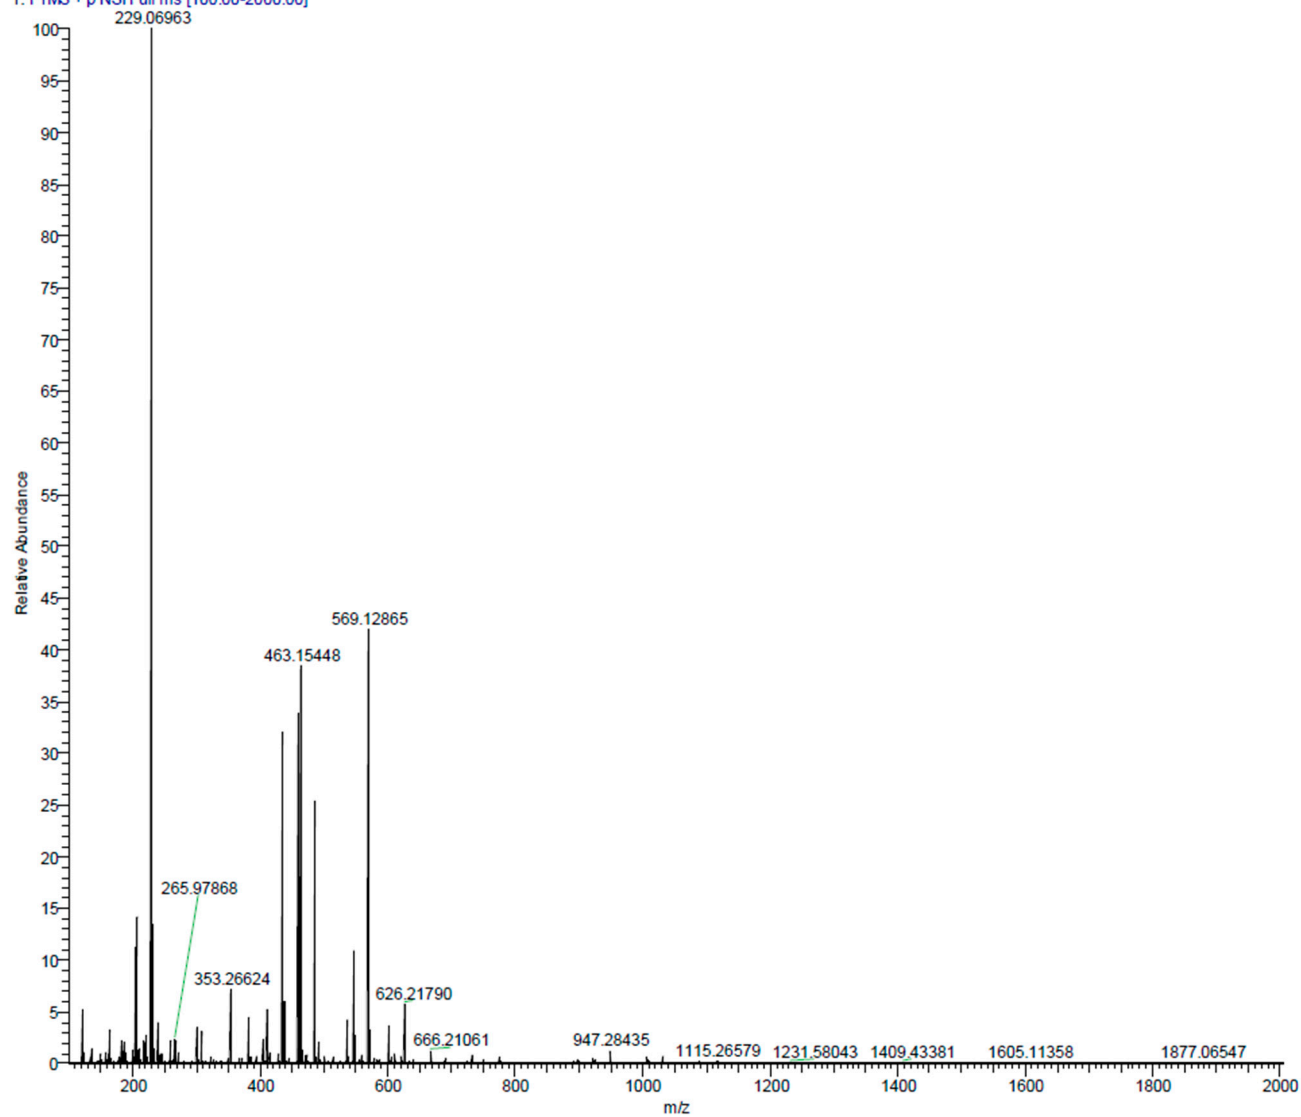

Zoomed spectrum (Top spectrum: measured mass; bottom spectrum: calculated mass)

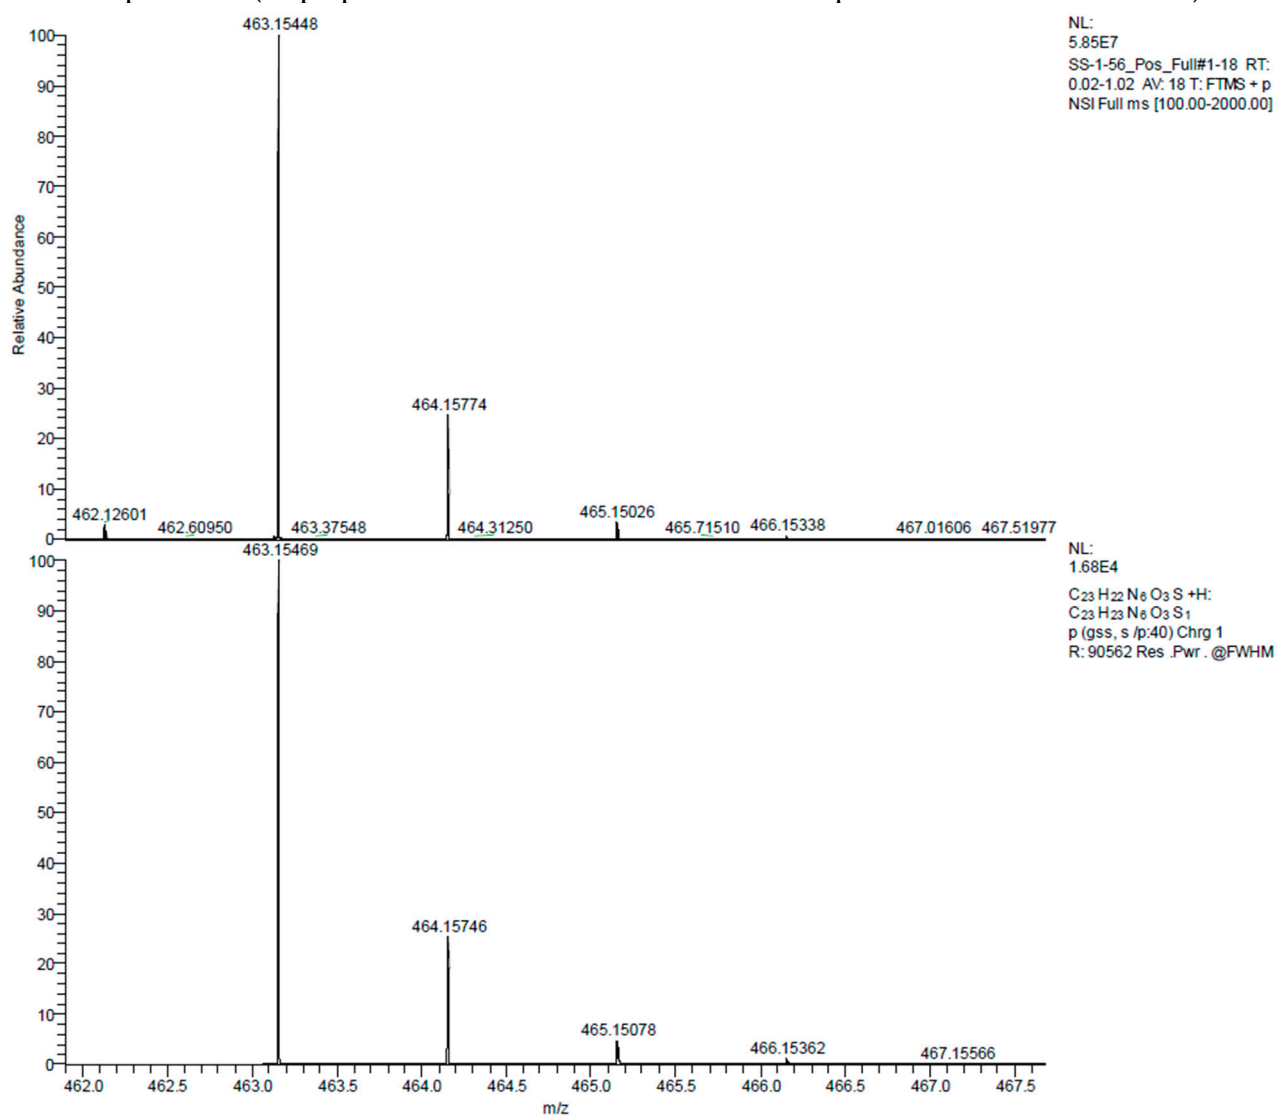



2-(4-(((6-Chloro-3-cyclopropyl-4-oxo-3,4-dihydroquinazolin-2-yl)thio)methyl)-1H-1,2,3-triazol-1-yl)-N-(4-methoxyphenyl)acetamide (**6c**)

Full spectrum

SS-1-59\_Pos\_Full #7-18 RT: 0.37-0.99 AV: 12 NL: 4.49E6  
T: FTMS + p NSI sid=40.00 Full ms [100.00-2000.00]

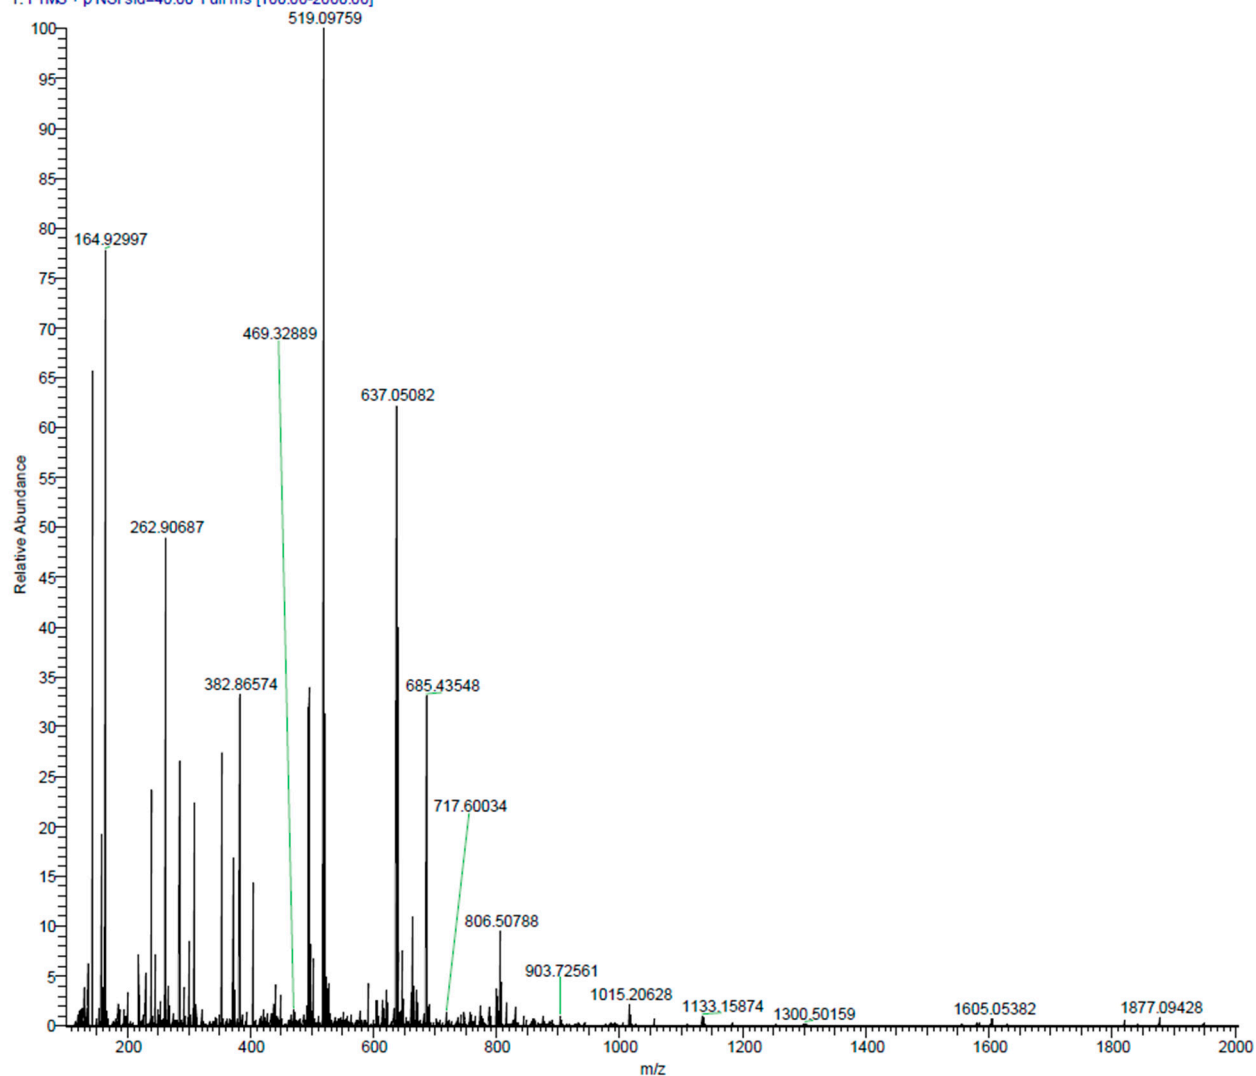

Zoomed spectrum (Top spectrum: measured mass; bottom spectrum: calculated mass)

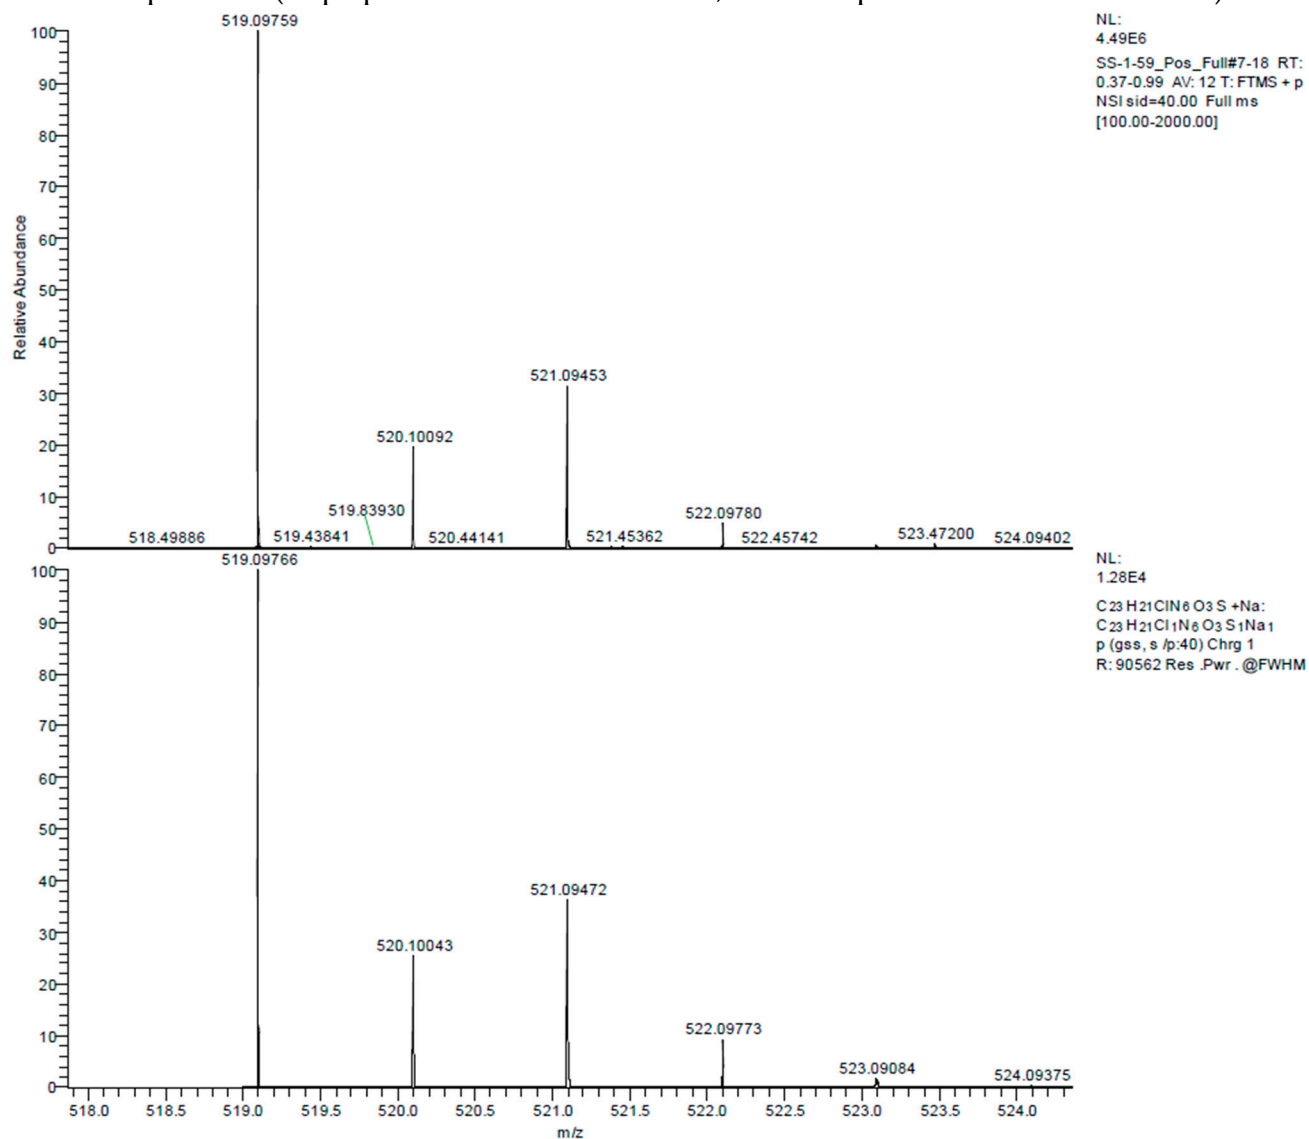

*N*-(4-Methoxyphenyl)-2-(4-(((4-oxo-3-phenyl-3,4-dihydroquinazolin-2-yl)thio)methyl)-1*H*-1,2,3-triazol-1-yl)acetamide (**6d**)

Full spectrum

SS-1-54\_Pos\_Full #28-35 RT: 1.51-1.90 AV: 8 NL: 1.53E7  
T: FTMS + p NSI Full ms [100.00-2000.00]

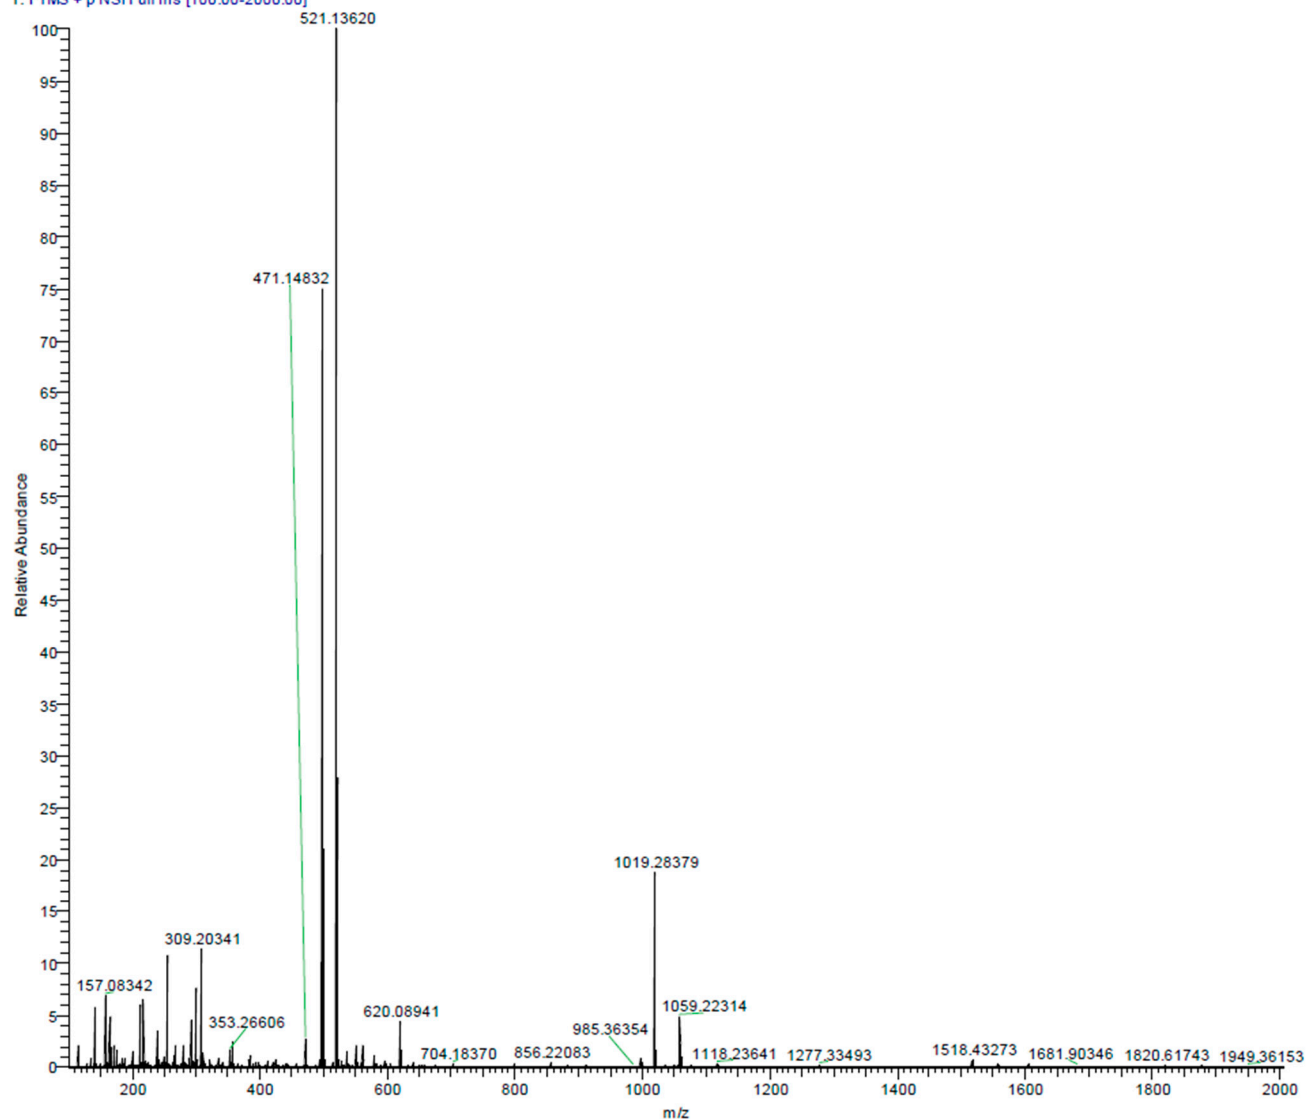

Zoomed spectrum (Top spectrum: measured mass; bottom spectrum: calculated mass)

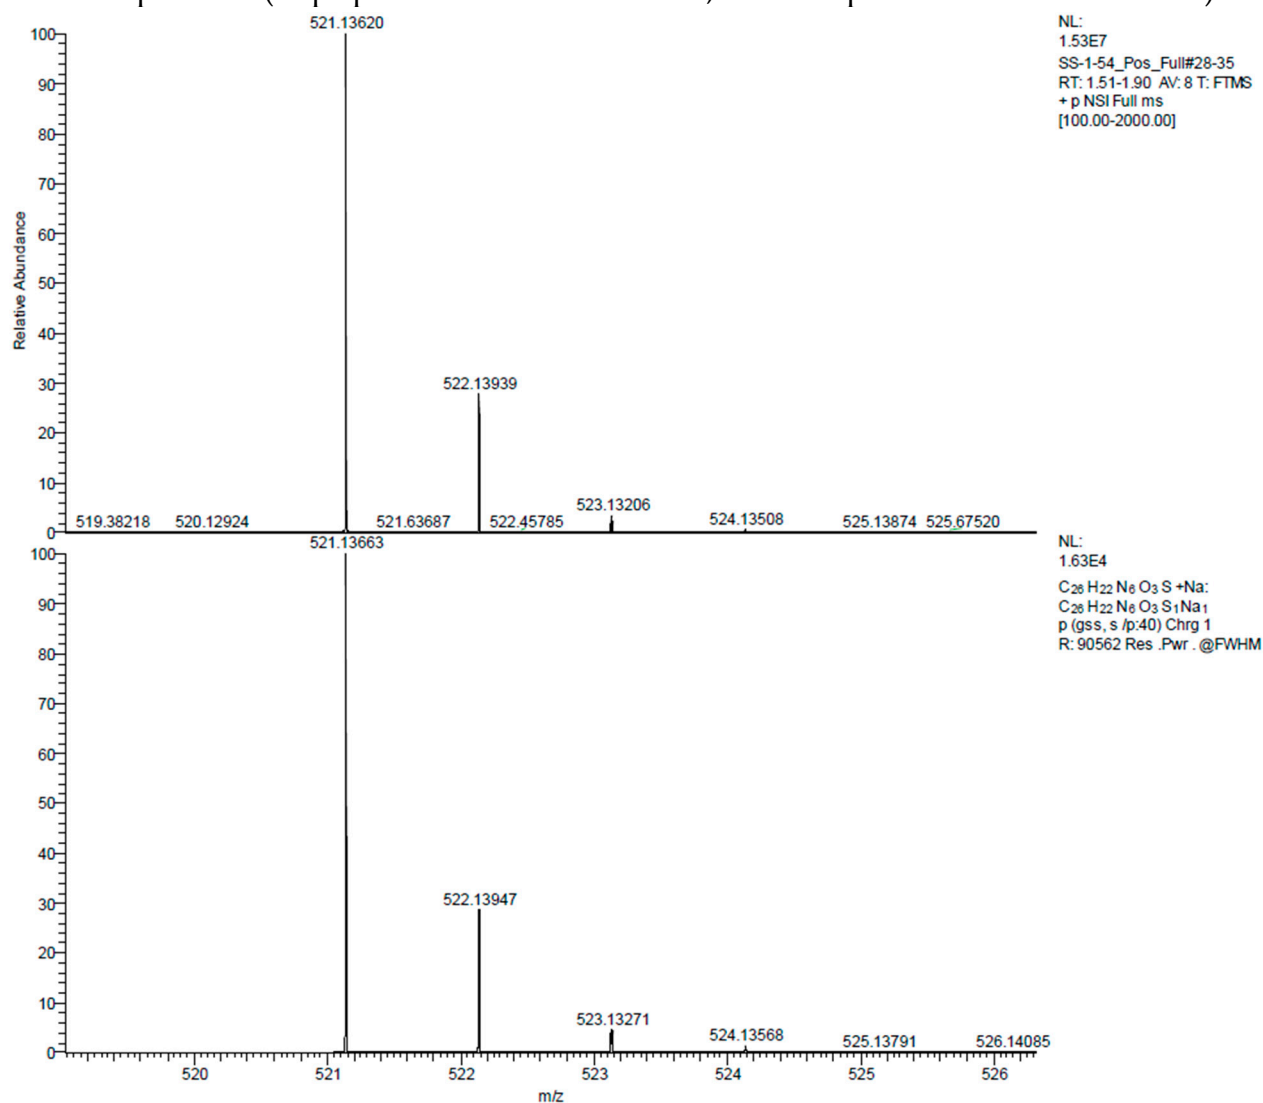

2-(4-(((3-Cyclopropyl-4-oxo-3,4-dihydroquinazolin-2-yl)thio)methyl)-1*H*-1,2,3-triazol-1-yl)-*N*-(4-nitrophenyl)acetamide (**6e**)

Full spectrum

SS-1-68\_Pos\_Full #1-18 RT: 0.02-1.03 AV: 18 NL: 9.02E6  
T: FTMS + p NSI Full ms [100.00-2000.00]

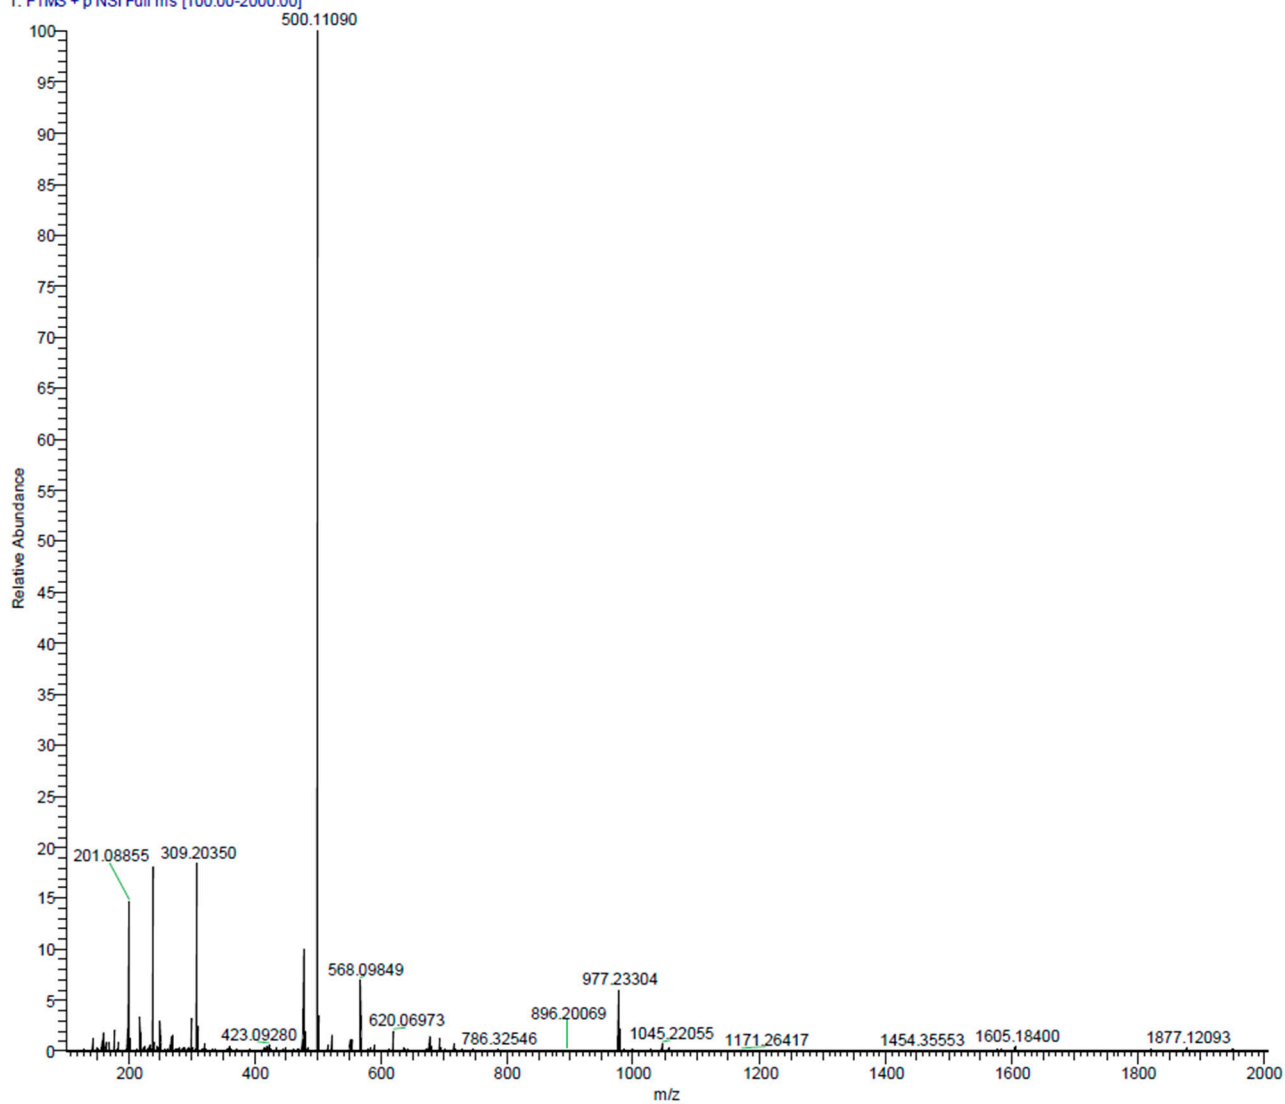

Zoomed spectrum (Top spectrum: measured mass; bottom spectrum: calculated mass)

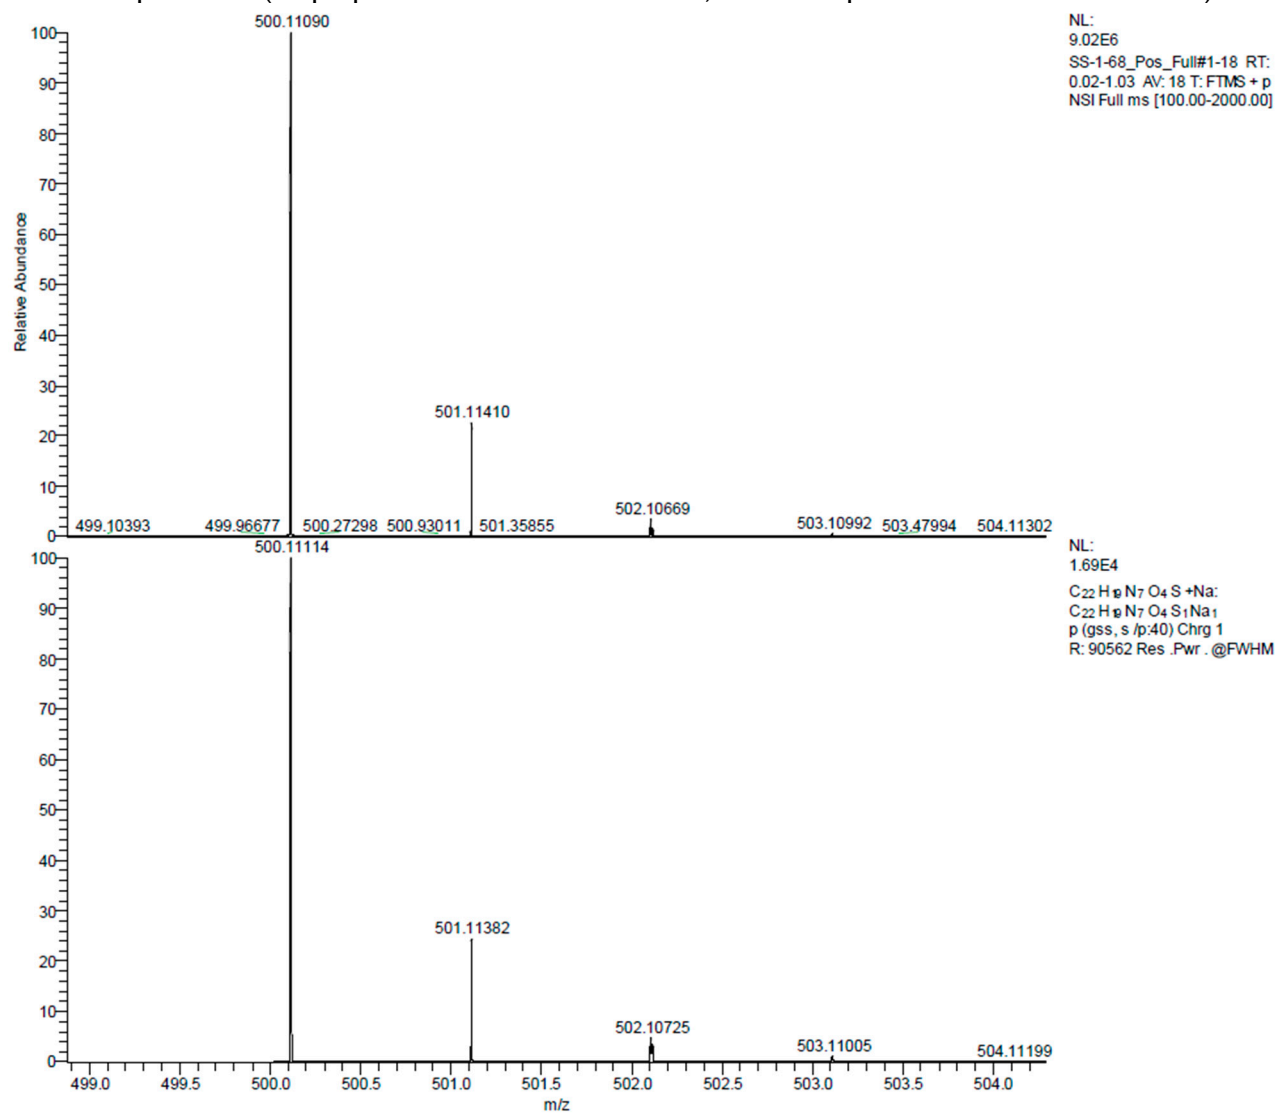

### 3-Cyclopropyl-2-mercaptoquinazolin-4(3H)-one (8a)

#### Full spectrum

SS-1-10\_Pos\_Full #1-17 RT: 0.02-0.95 AV: 17 NL: 4.37E7  
T: FTMS + p NSI Full ms [100.00-2000.00]

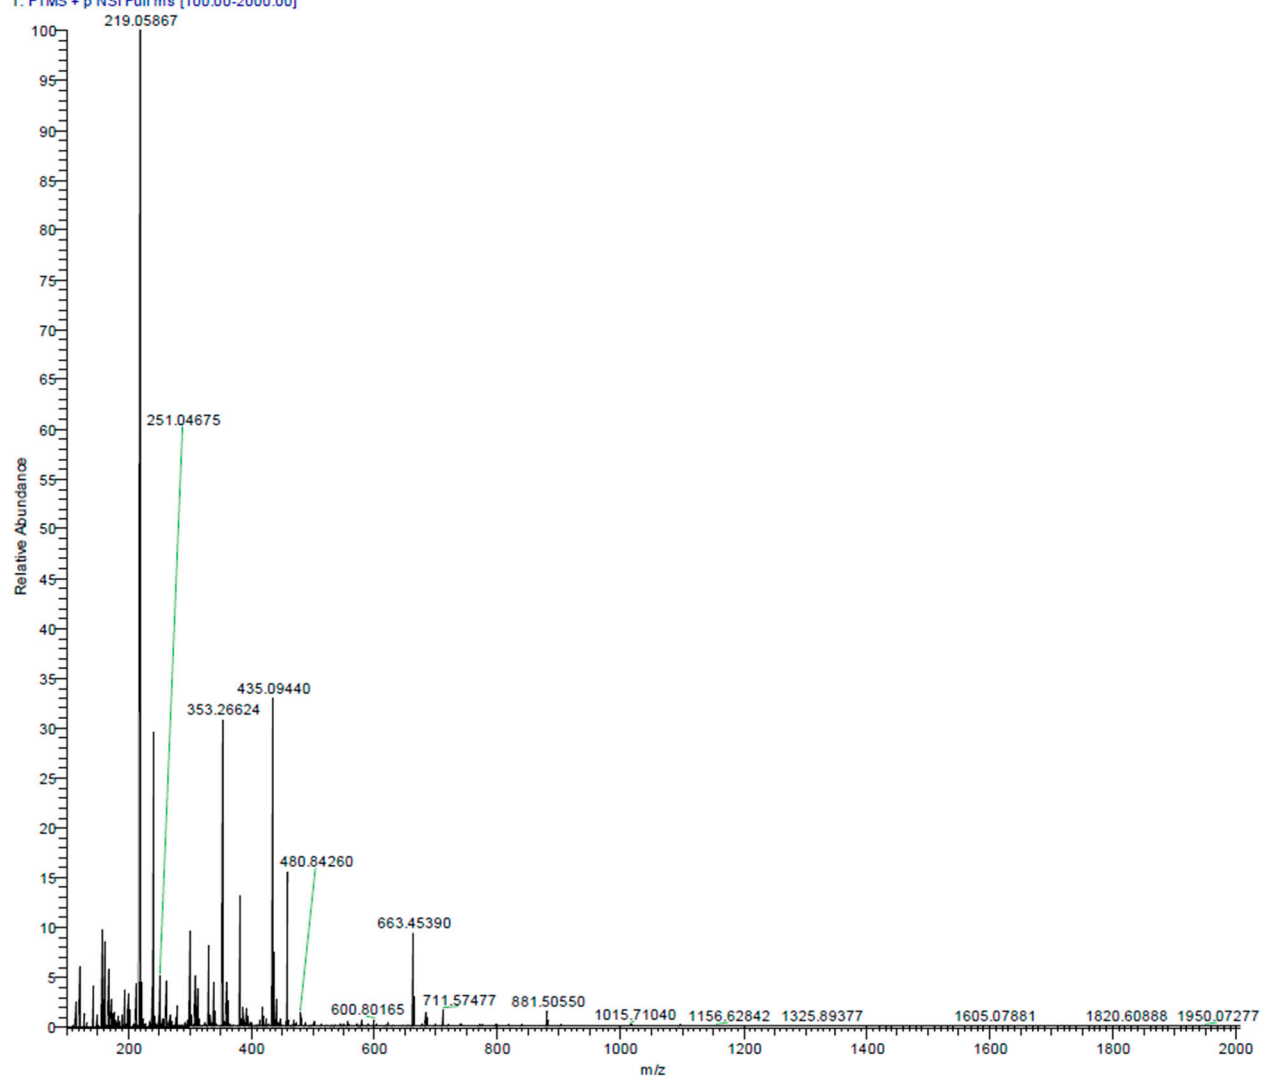

Zoomed spectrum (Top spectrum: measured mass; bottom spectrum: calculated mass)

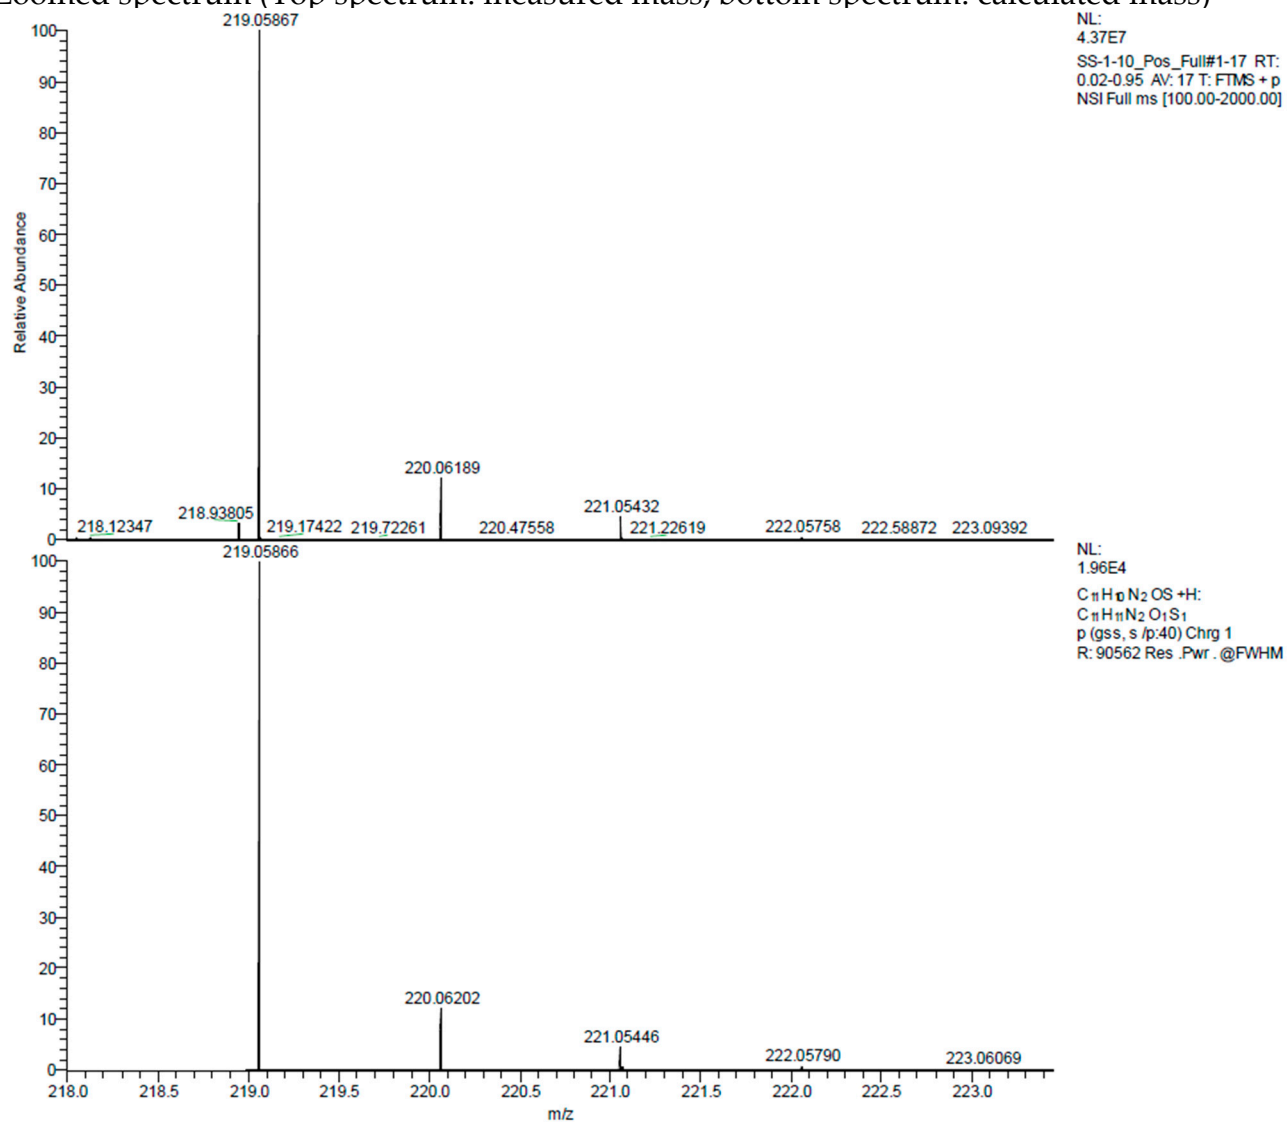



## 2-Mercapto-3-phenylquinazolin-4(3H)-one (8b)

### Full spectrum

SS-1-14\_Pos\_Full #2-30 RT: 0.08-1.68 AV: 29 NL: 1.36E8  
T: FTMS + p NSI Full ms [100.00-2000.00]

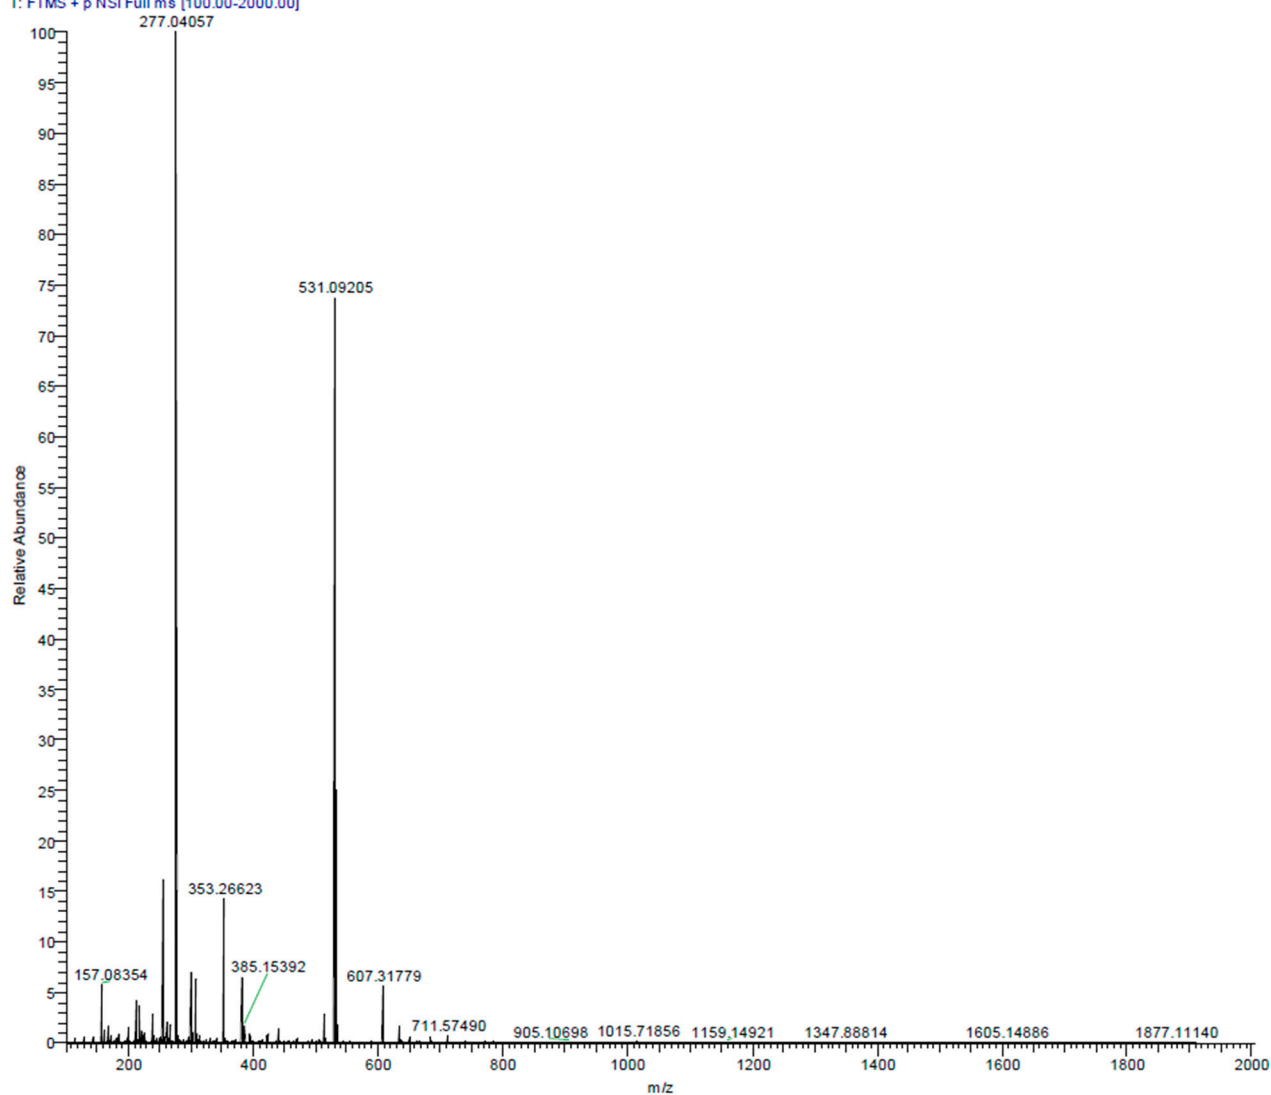

# 6-Chloro-3-cyclopropyl-2-mercaptoquinazolin-4(3H)-one (8c)

## Full spectrum

SS-1-16\_Pos\_Full #1-18 RT: 0.02-1.02 AV: 18 NL: 8.41E6  
T: FTMS + p NSI Full ms [100.00-2000.00]

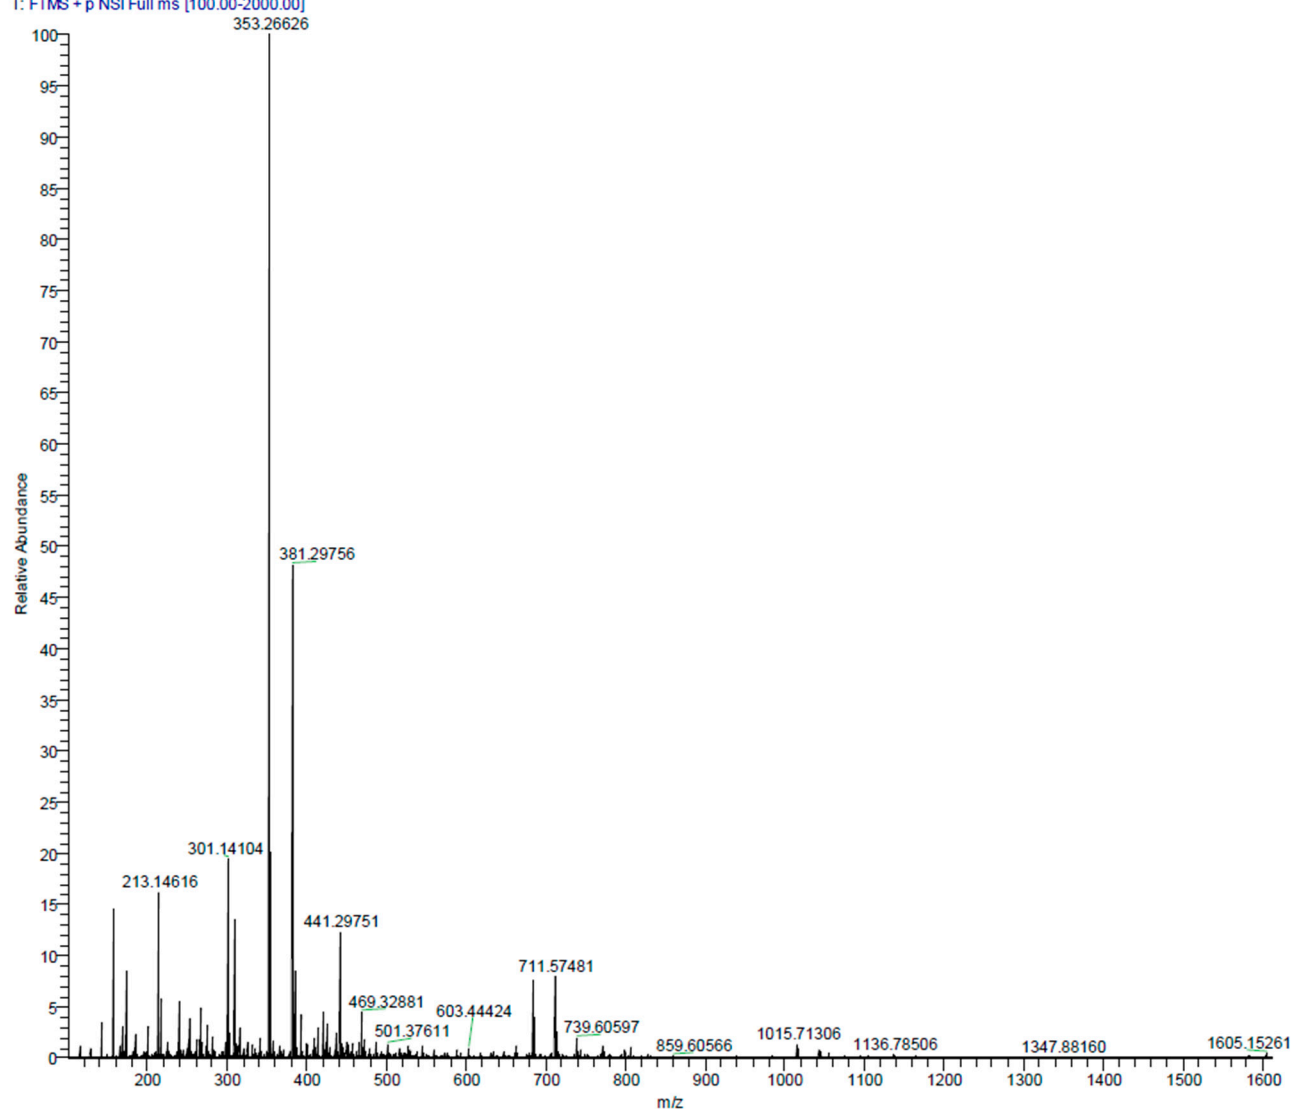

Zoomed spectrum (Top spectrum: measured mass; bottom spectrum: calculated mass)

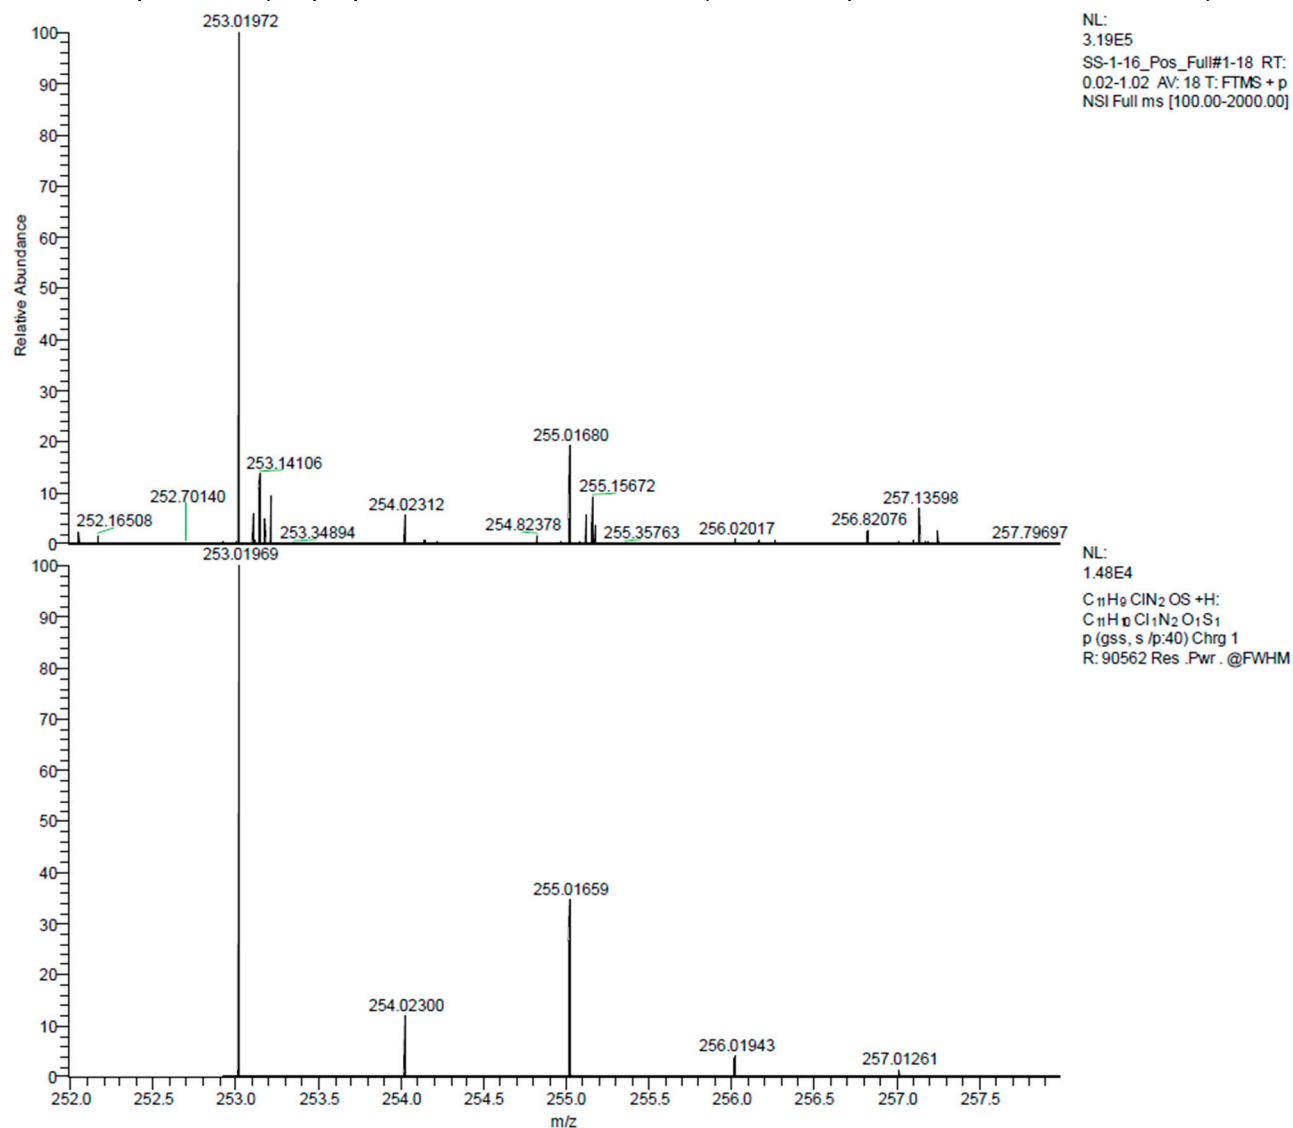

2-((3-Cyclopropyl-4-oxo-3,4-dihydroquinazolin-2-yl)thio)acetic acid (**9a**)

Full spectrum

SS-1-24\_Pos\_Full #1-7 RT: 0.02-0.38 AV: 7 NL: 7.22E6

T: FTMS + p NSI Full ms [100.00-2000.00]

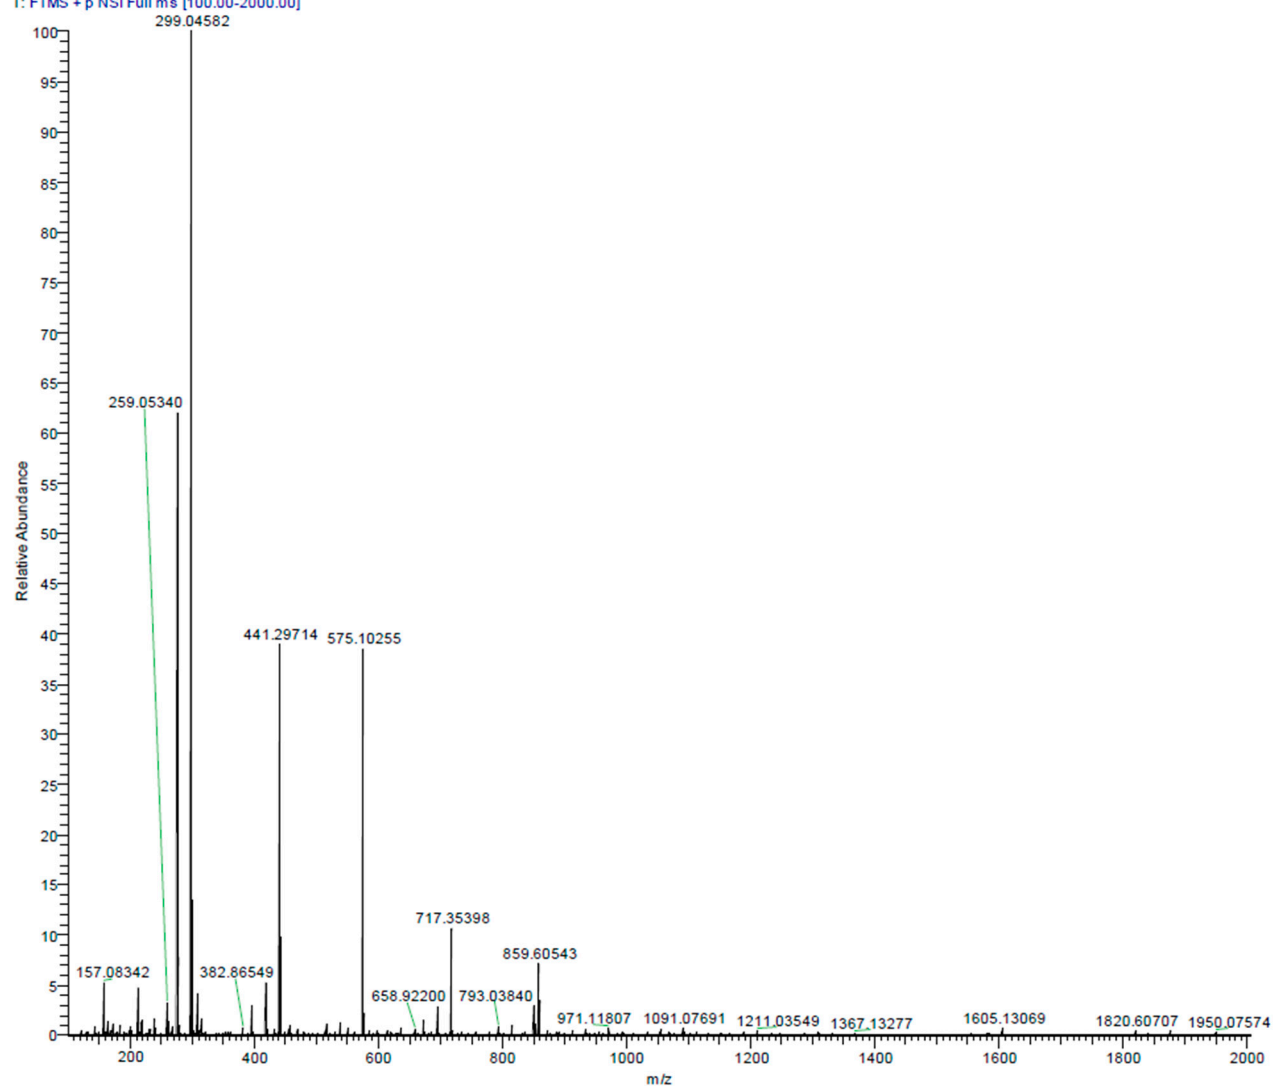

Zoomed spectrum (Top spectrum: measured mass; bottom spectrum: calculated mass)

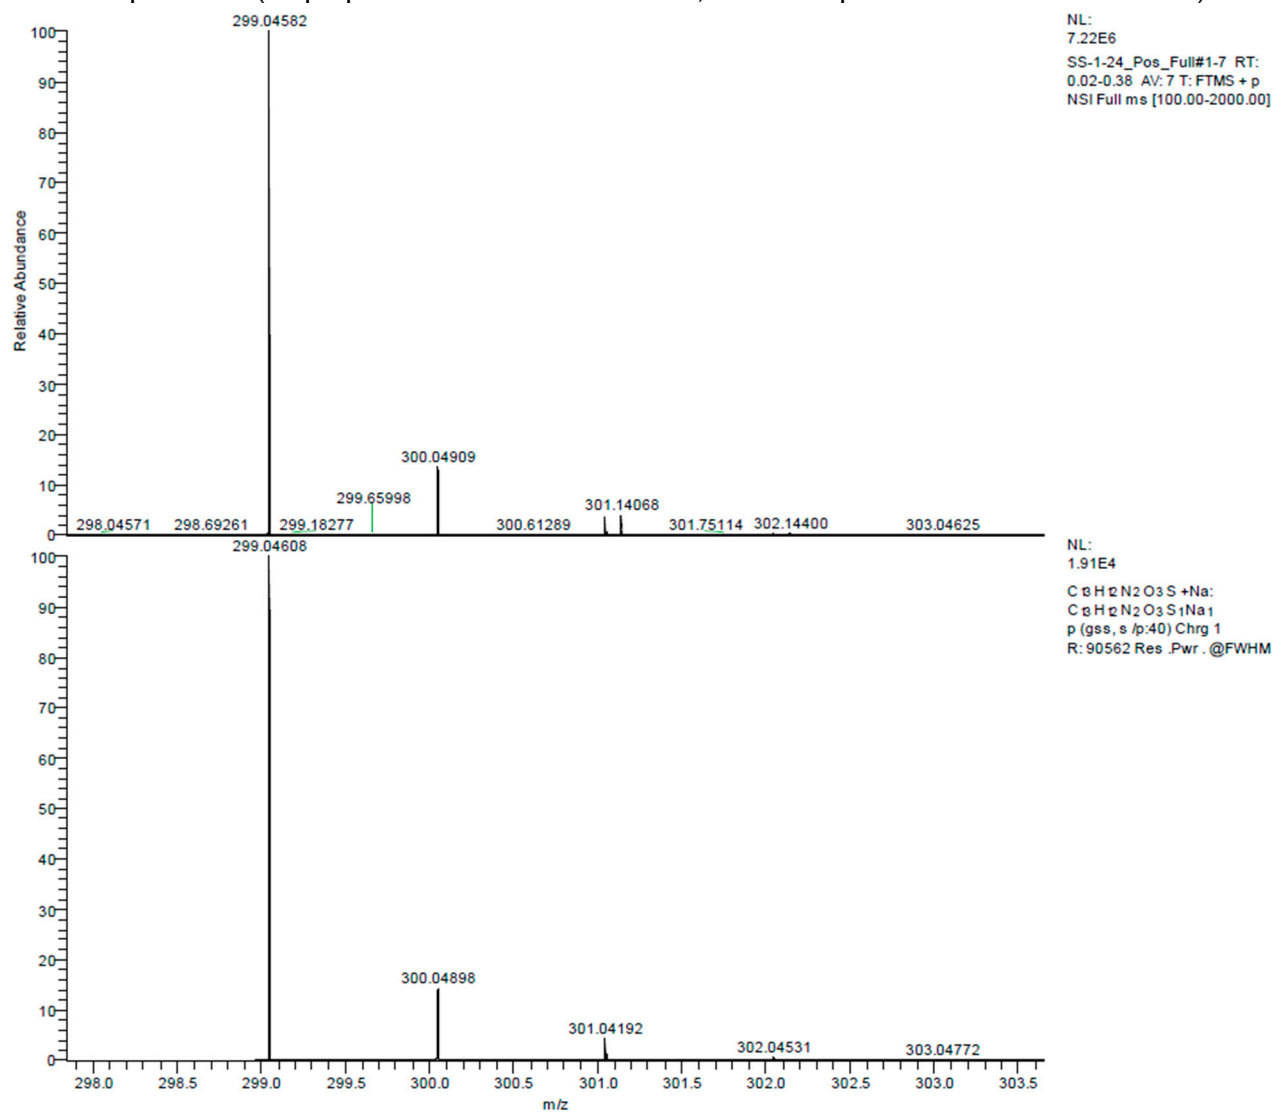

2-((4-Oxo-3-phenyl-3,4-dihydroquinazolin-2-yl)thio)acetic acid (**9b**)

Full spectrum

SS-1-23\_Pos\_Full #1-9 RT: 0.01-0.48 AV: 9 NL: 1.56E8  
T: FTMS + p NSI Full ms [100.00-2000.00]

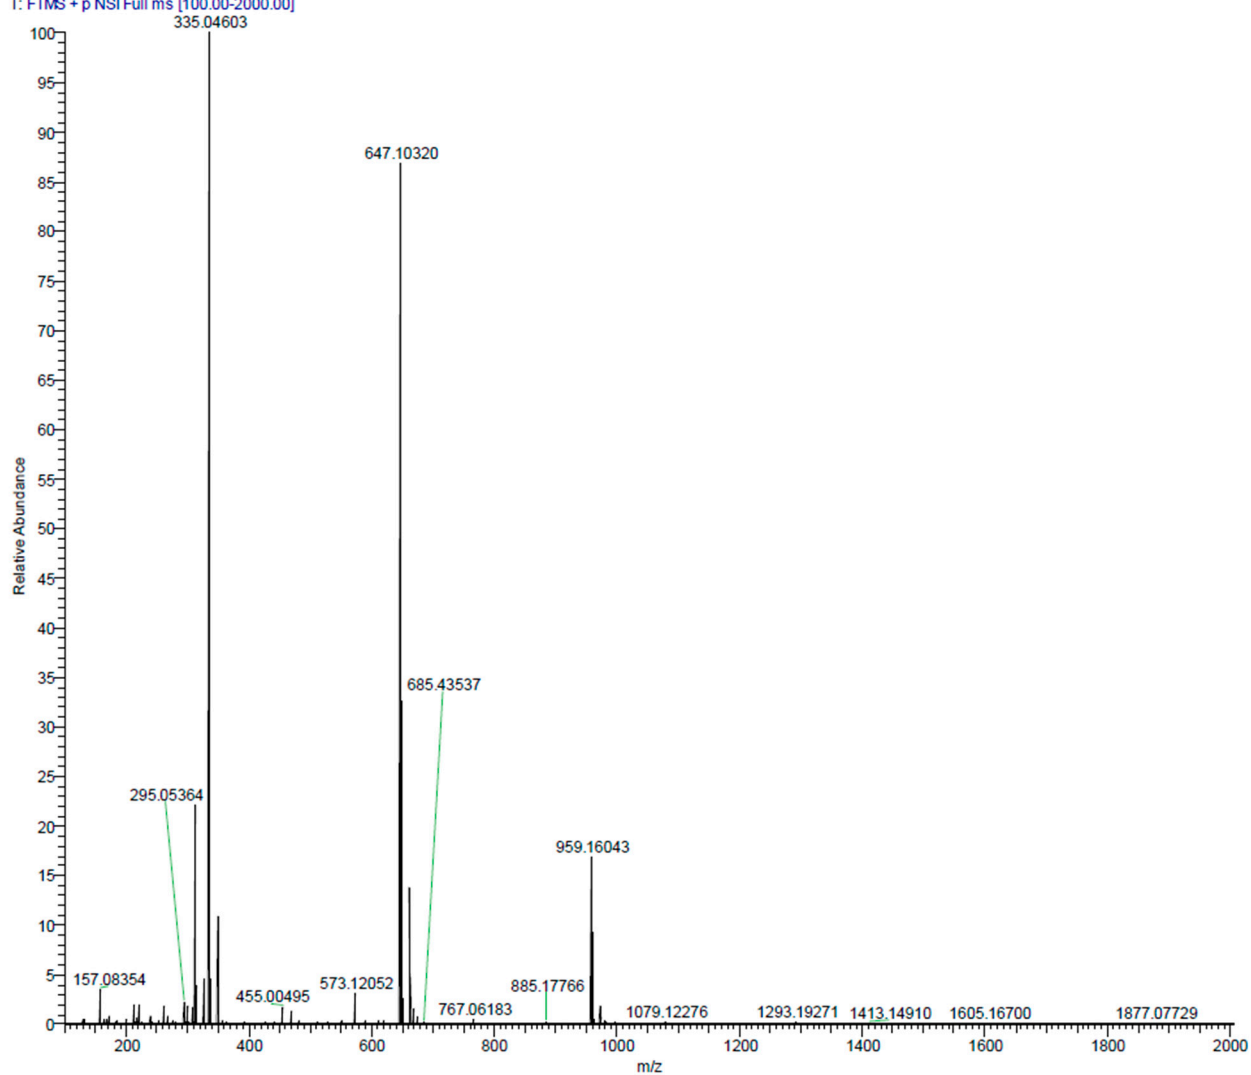

Zoomed spectrum (Top spectrum: measured mass; bottom spectrum: calculated mass)

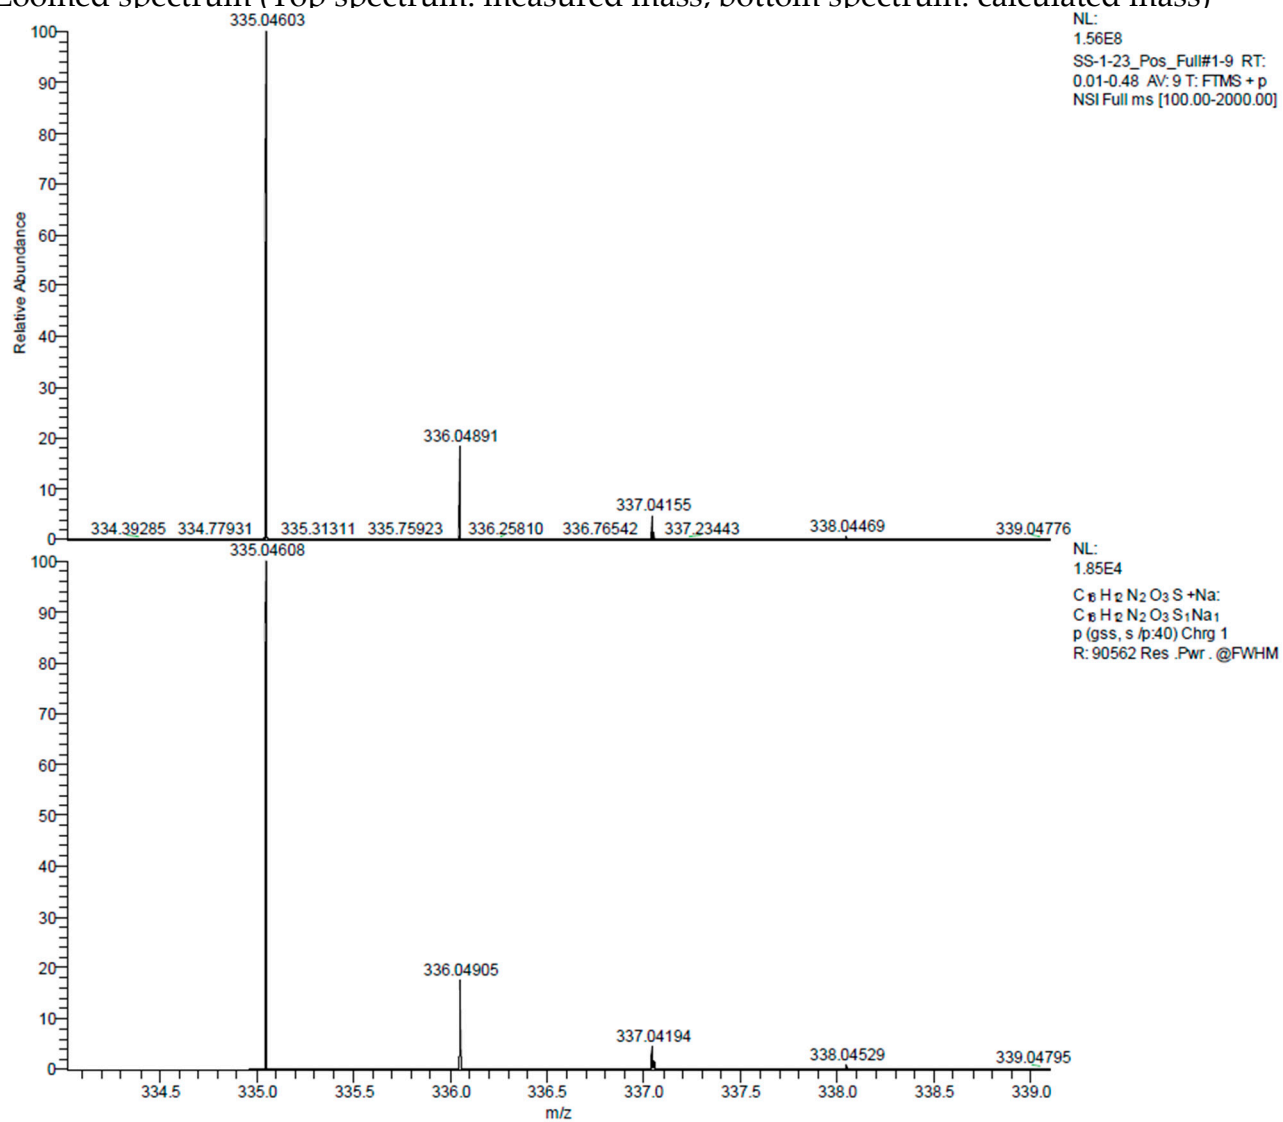

2-((6-Chloro-3-cyclopropyl-4-oxo-3,4-dihydroquinazolin-2-yl)thio)acetic acid (9c)

Full spectrum

SS-1-19\_Pos\_Full #1-8 RT: 0.02-0.43 AV: 8 NL: 1.34E8  
T: FTMS + p NSI Full ms [100.00-2000.00]

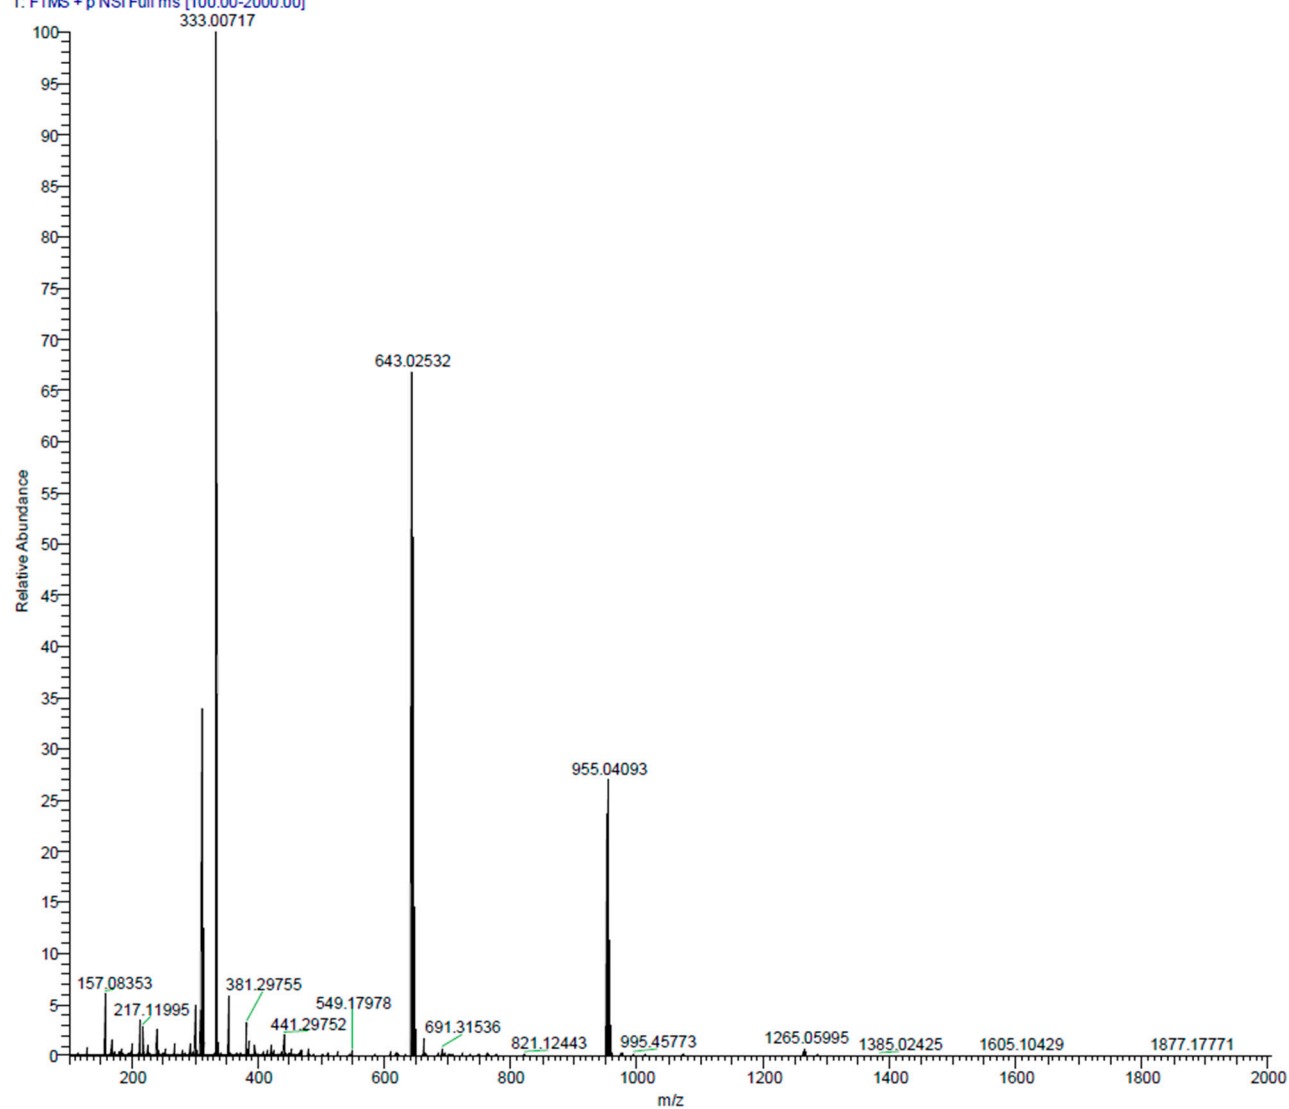



Zoomed spectrum (Top spectrum: measured mass; bottom spectrum: calculated mass)

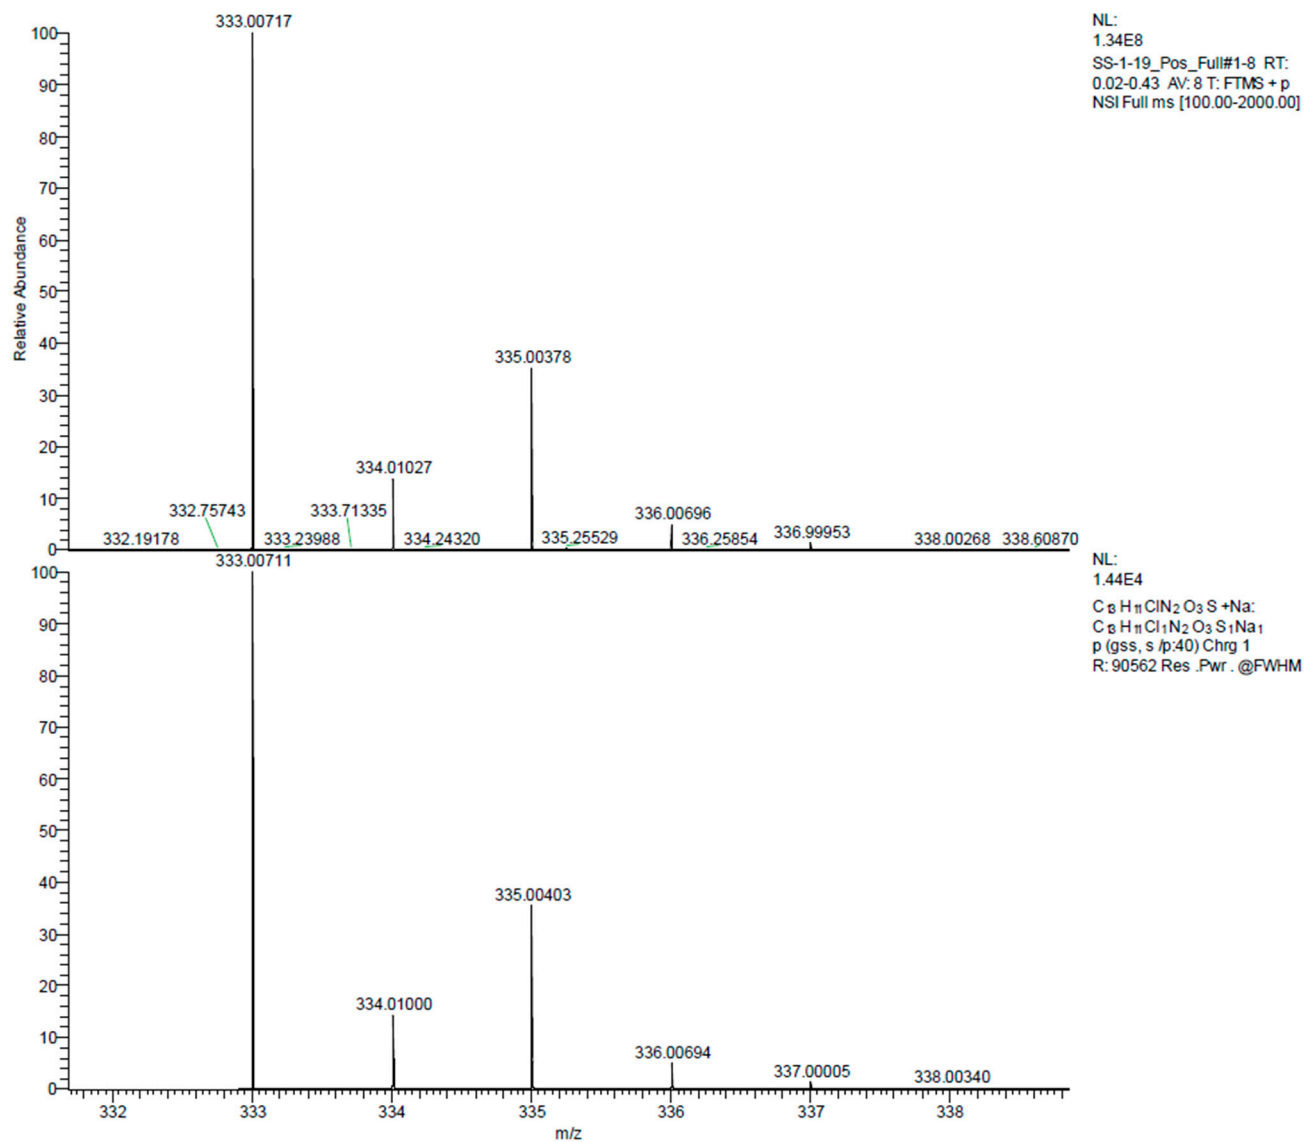

3-((4-Oxo-3-phenyl-3,4-dihydroquinazolin-2-yl)thio)propanoic acid (**9d**)

Full spectrum

SS-1-31\_Pos\_Full#1-18 RT: 0.02-1.02 AV: 18 NL: 2.52E7  
T: FTMS + p NSI Full ms [100.00-2000.00]

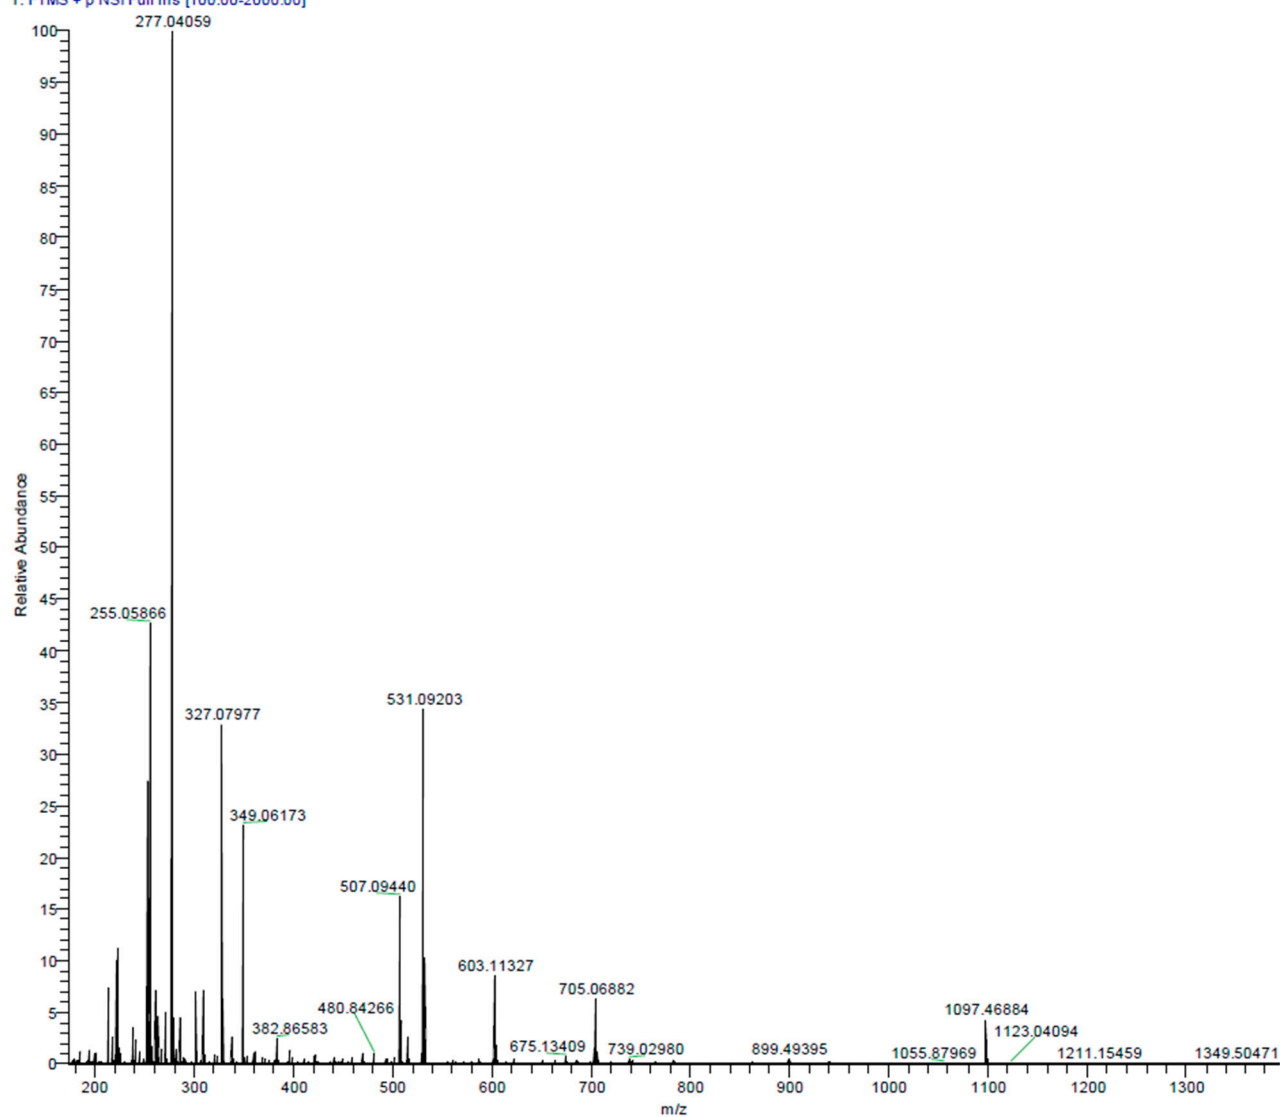

## 2-Chloro-*N*-(4-methoxyphenyl)acetamide (**12**)

### Full spectrum

SS-1-34\_Pos\_Full #1-12 RT: 0.02-0.67 AV: 12 NL: 1.14E8  
T: FTMS + p NSI Full ms [100.00-2000.00]

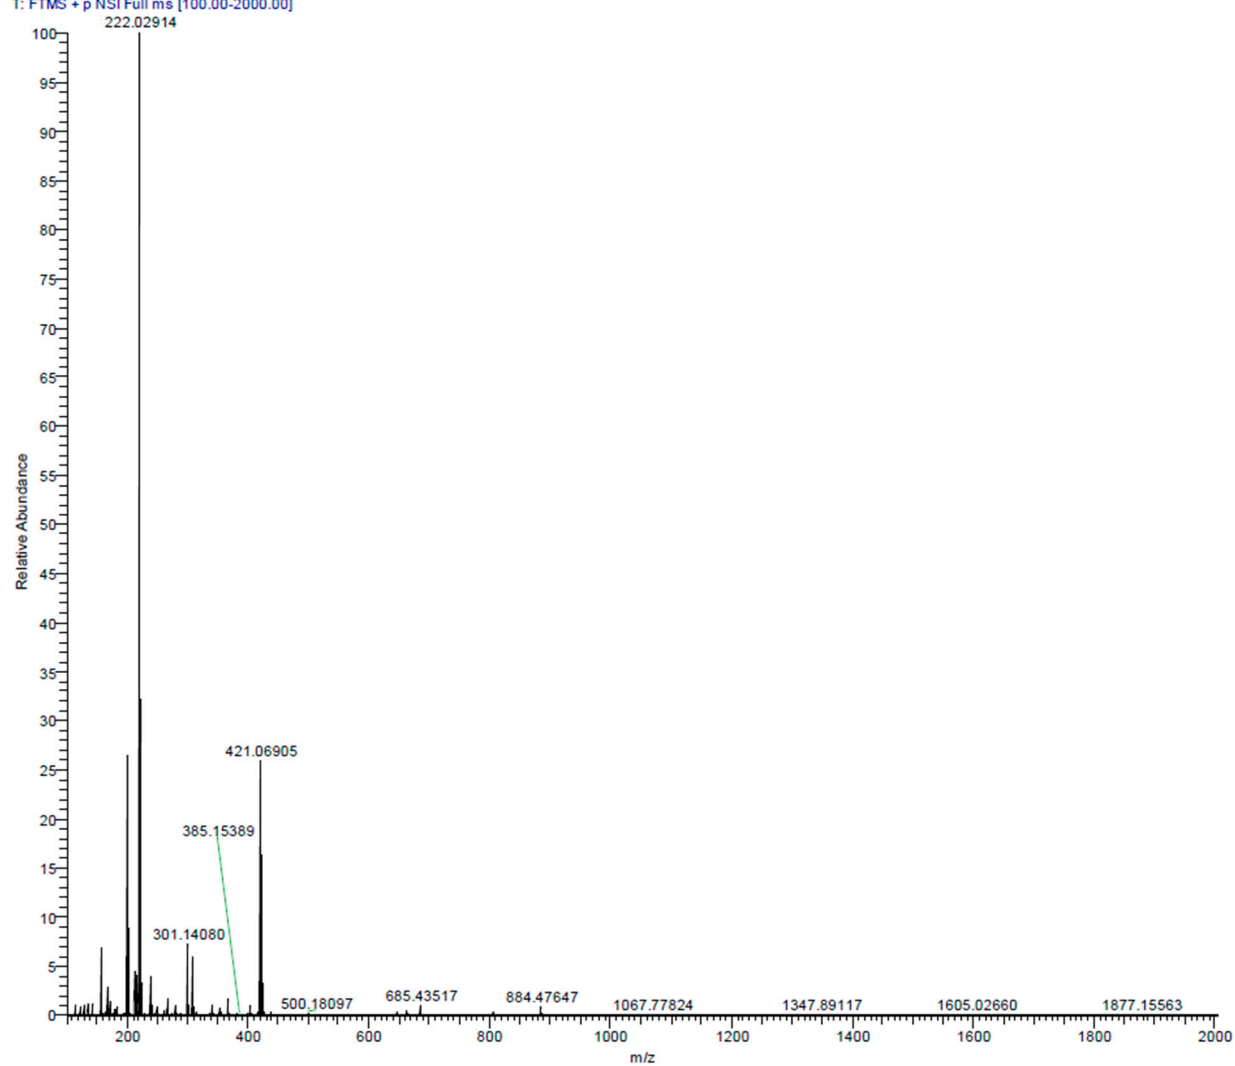

Zoomed spectrum (Top spectrum: measured mass; bottom spectrum: calculated mass)

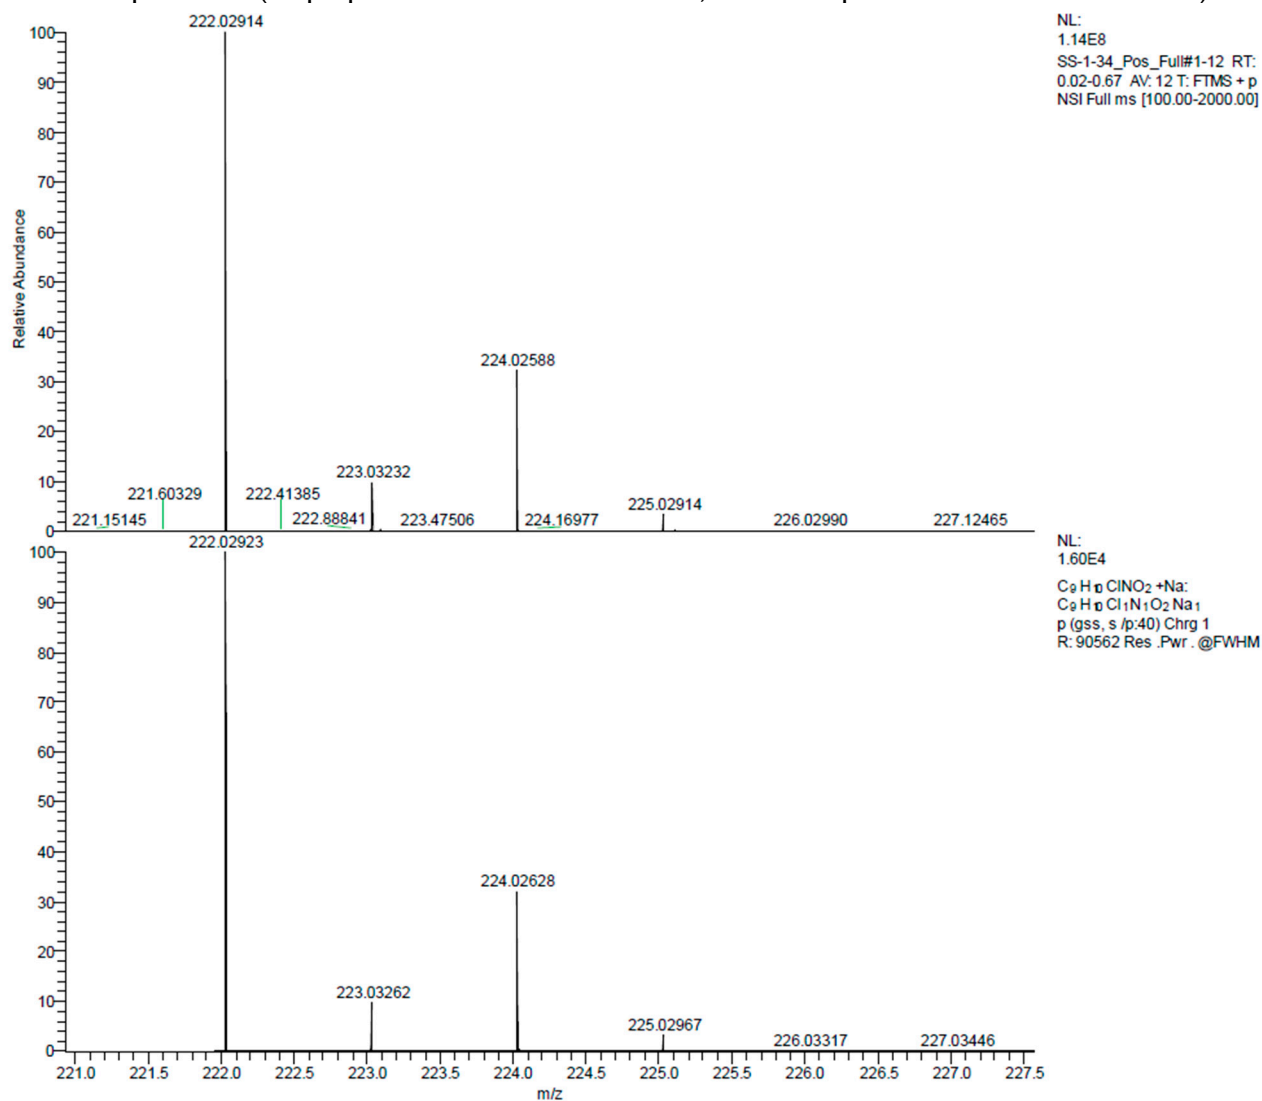

3-Cyclopropyl-2-(prop-2-yn-1-ylthio)quinazolin-4(3*H*)-one (**13a**)

Full spectrum

SS-1-55\_Pos\_Full #1-17 RT: 0.02-0.95 AV: 17 NL: 3.28E7

T: FTMS + p NSI Full ms [100.00-2000.00]

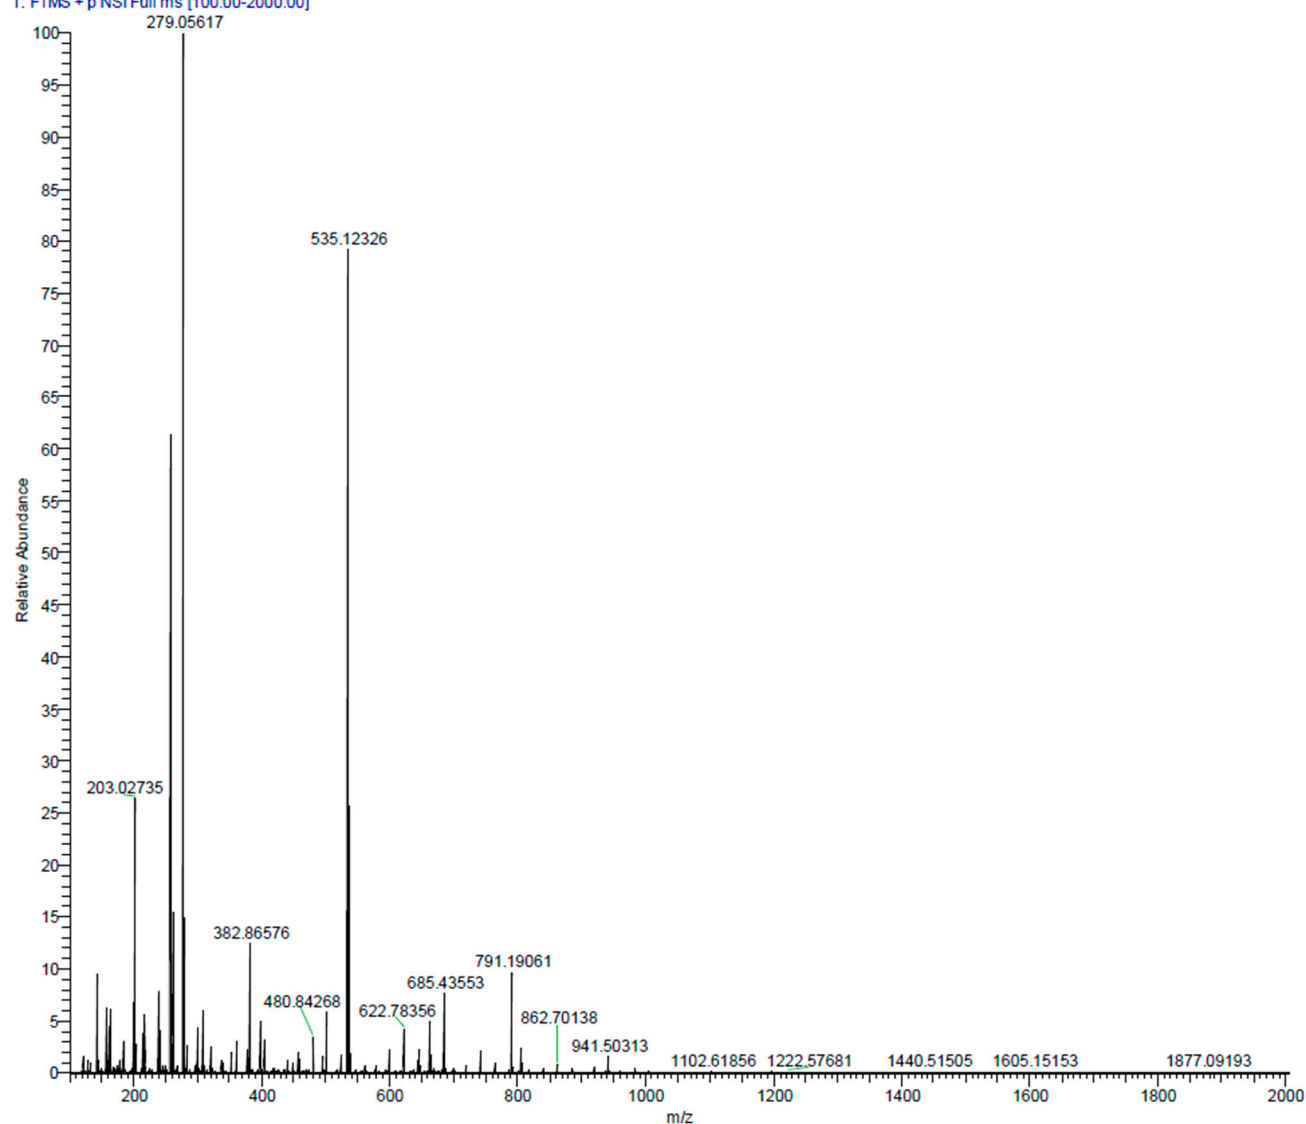

Zoomed spectrum (Top spectrum: measured mass; bottom spectrum: calculated mass)

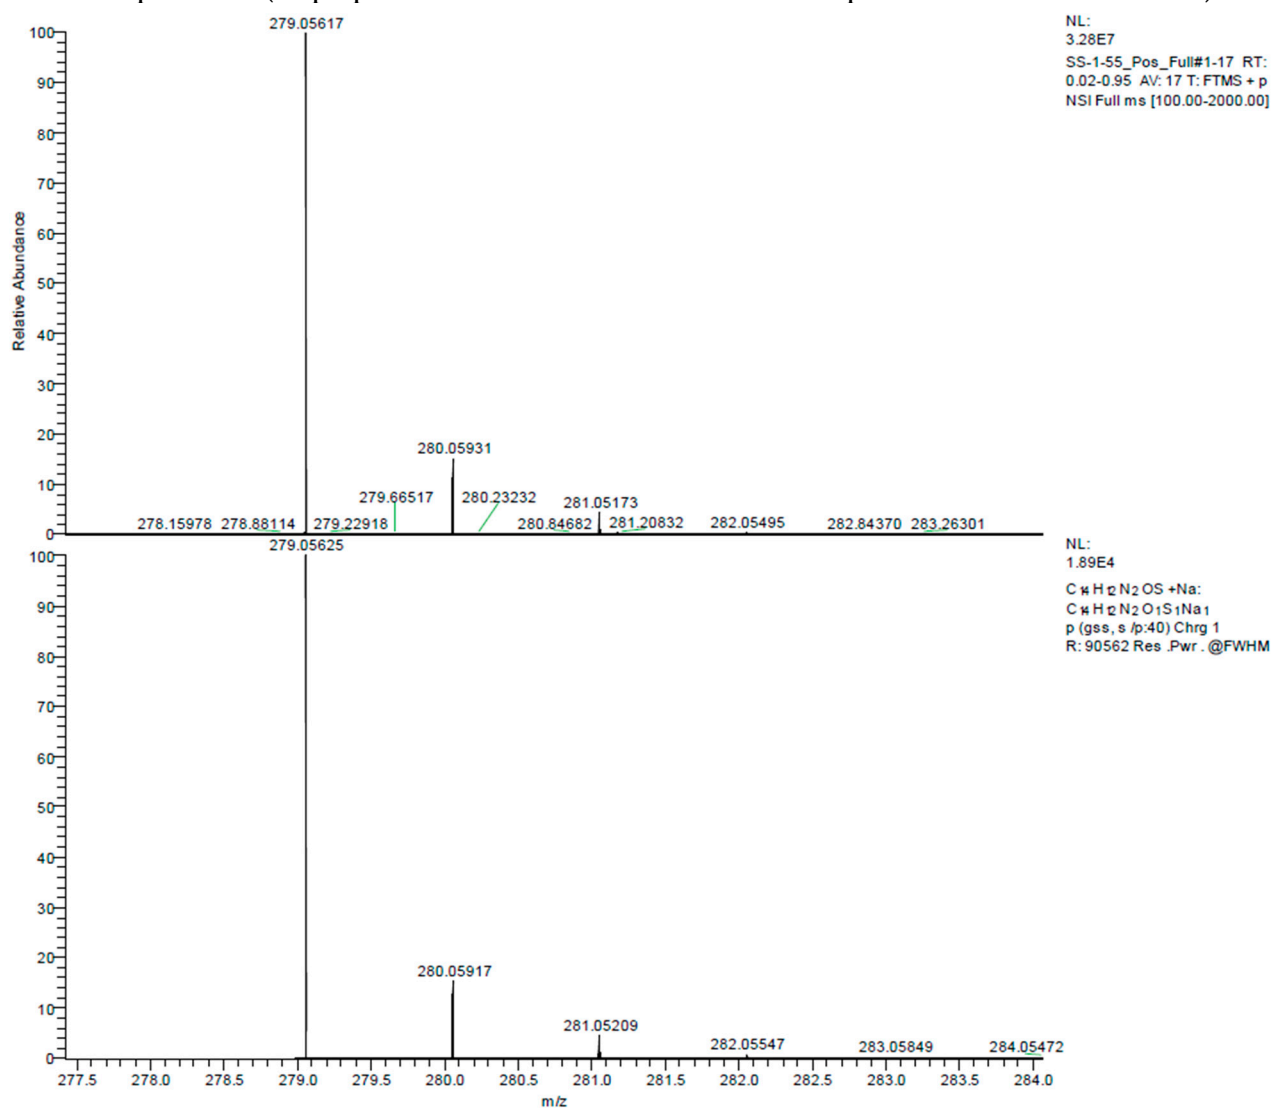

### 3-Phenyl-2-(prop-2-yn-1-ylthio)quinazolin-4(3H)-one (**13b**)

#### Full spectrum

SS-1-48\_Pos\_Full #1-18 RT: 0.02-0.98 AV: 18 NL: 1.96E8  
T: FTMS + p NSI Full ms [100.00-2000.00]

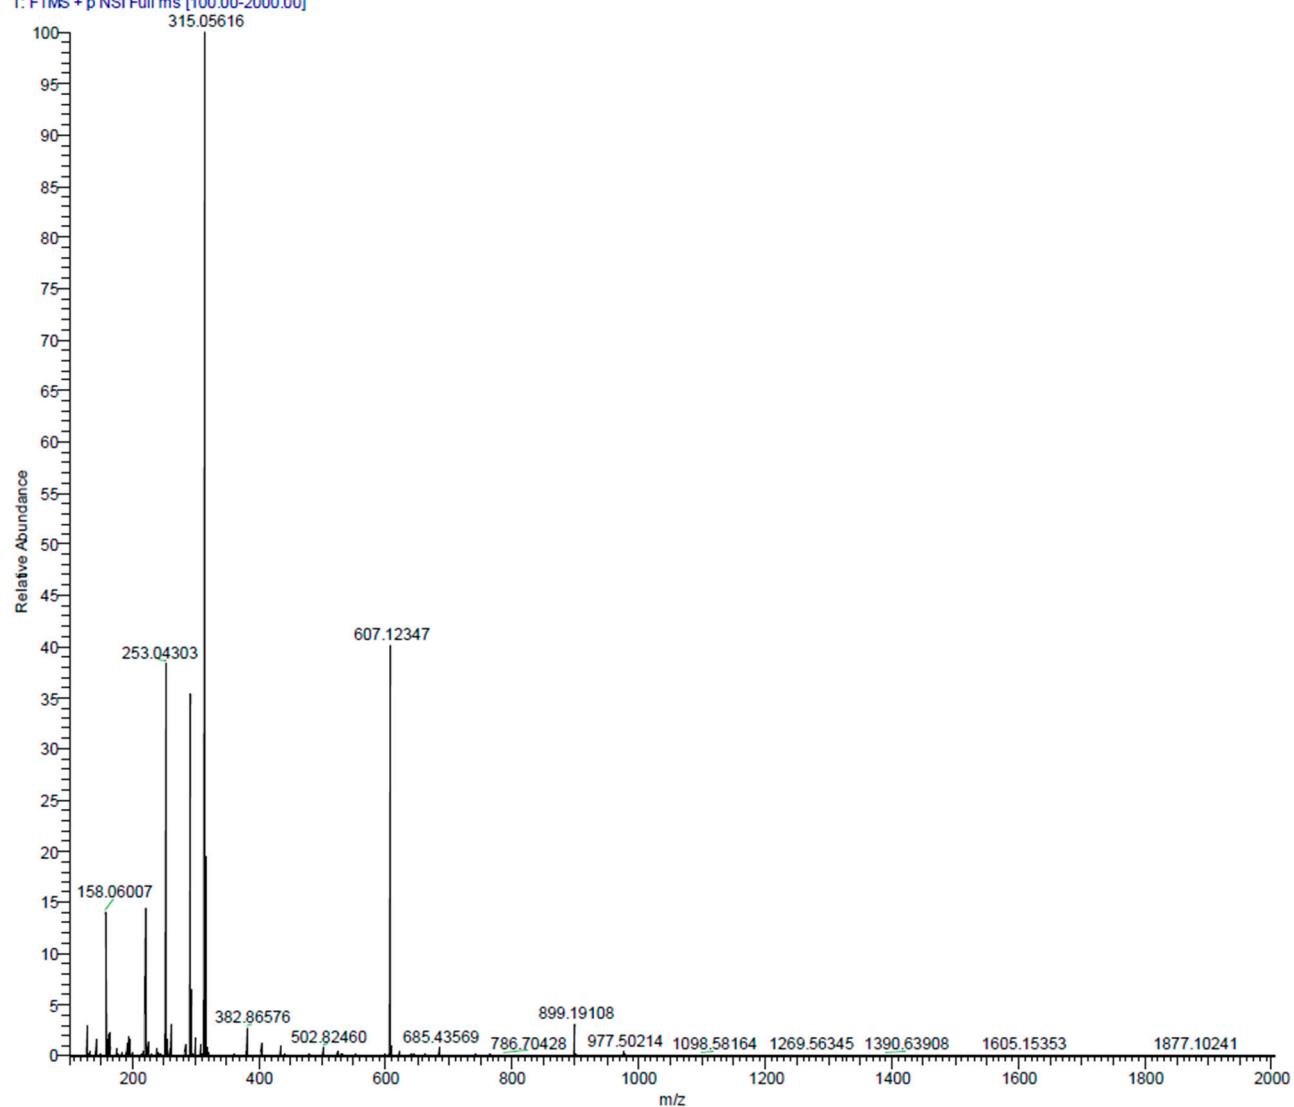

Zoomed spectrum (Top spectrum: measured mass; bottom spectrum: calculated mass)

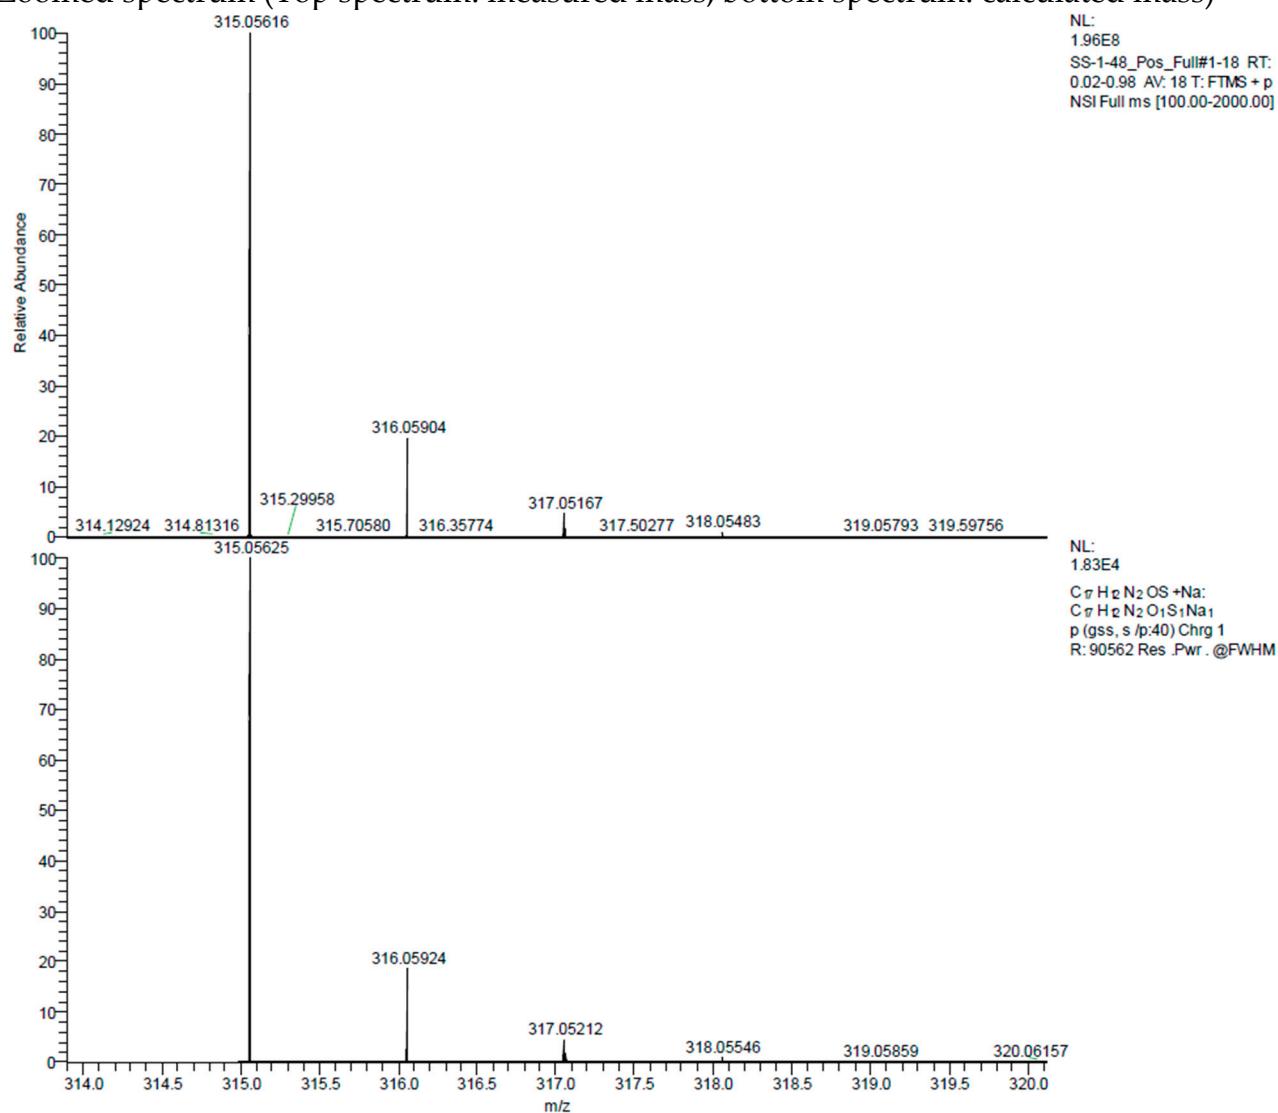



6-Chloro-3-cyclopropyl-2-(prop-2-yn-1-ylthio)quinazolin-4(3*H*)-one (**13c**)

Full spectrum

SS-1-58\_Pos\_Full #7-18 RT: 0.37-0.99 AV: 12 NL: 4.52E6  
T: FTMS + p NSI sid=40.00 Full ms [100.00-2000.00]

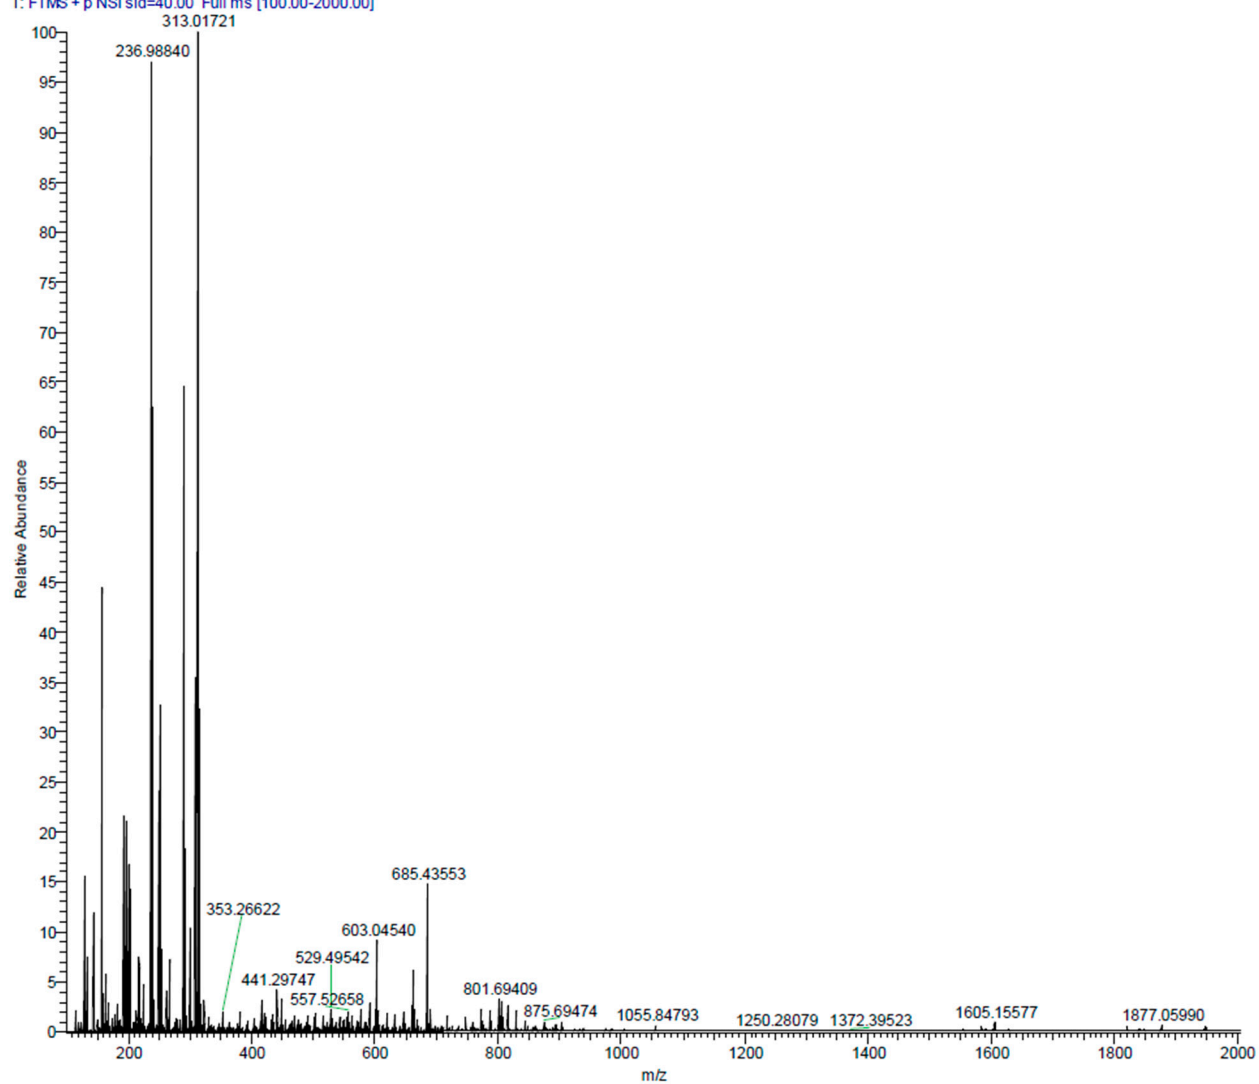

Zoomed spectrum (Top spectrum: measured mass; bottom spectrum: calculated mass)

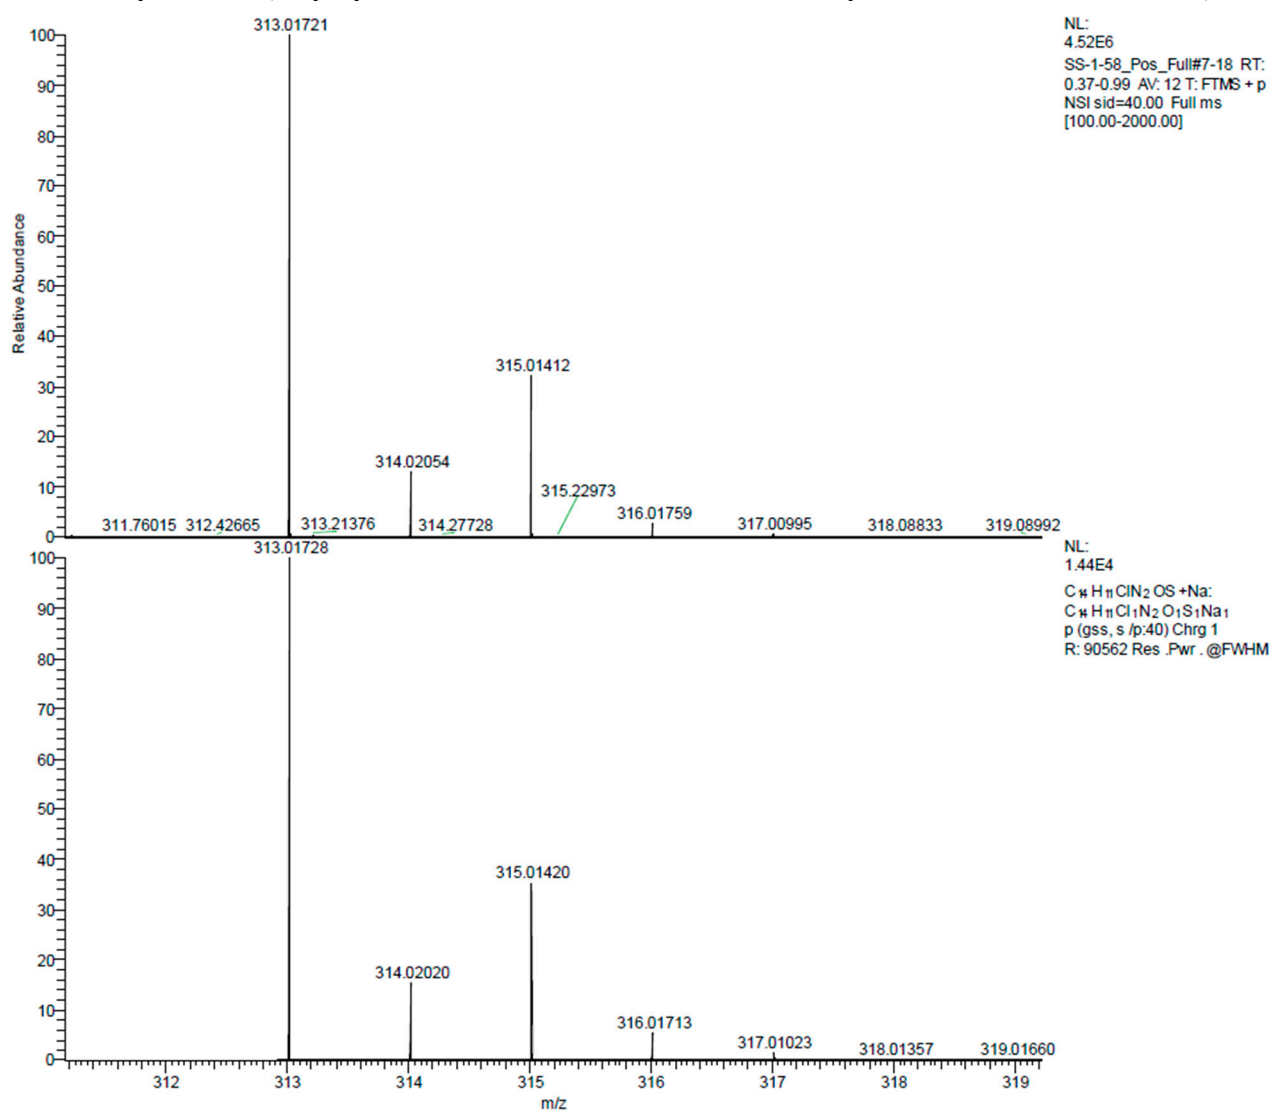

## 2-Bromo-*N*-(4-methoxyphenyl)acetamide (**15a**)

### Full spectrum

SS-1-52\_Pos\_Full #1-15 RT: 0.02-0.82 AV: 15 NL: 3.14E8  
T: FTMS + p NSI Full ms [100.00-2000.00]

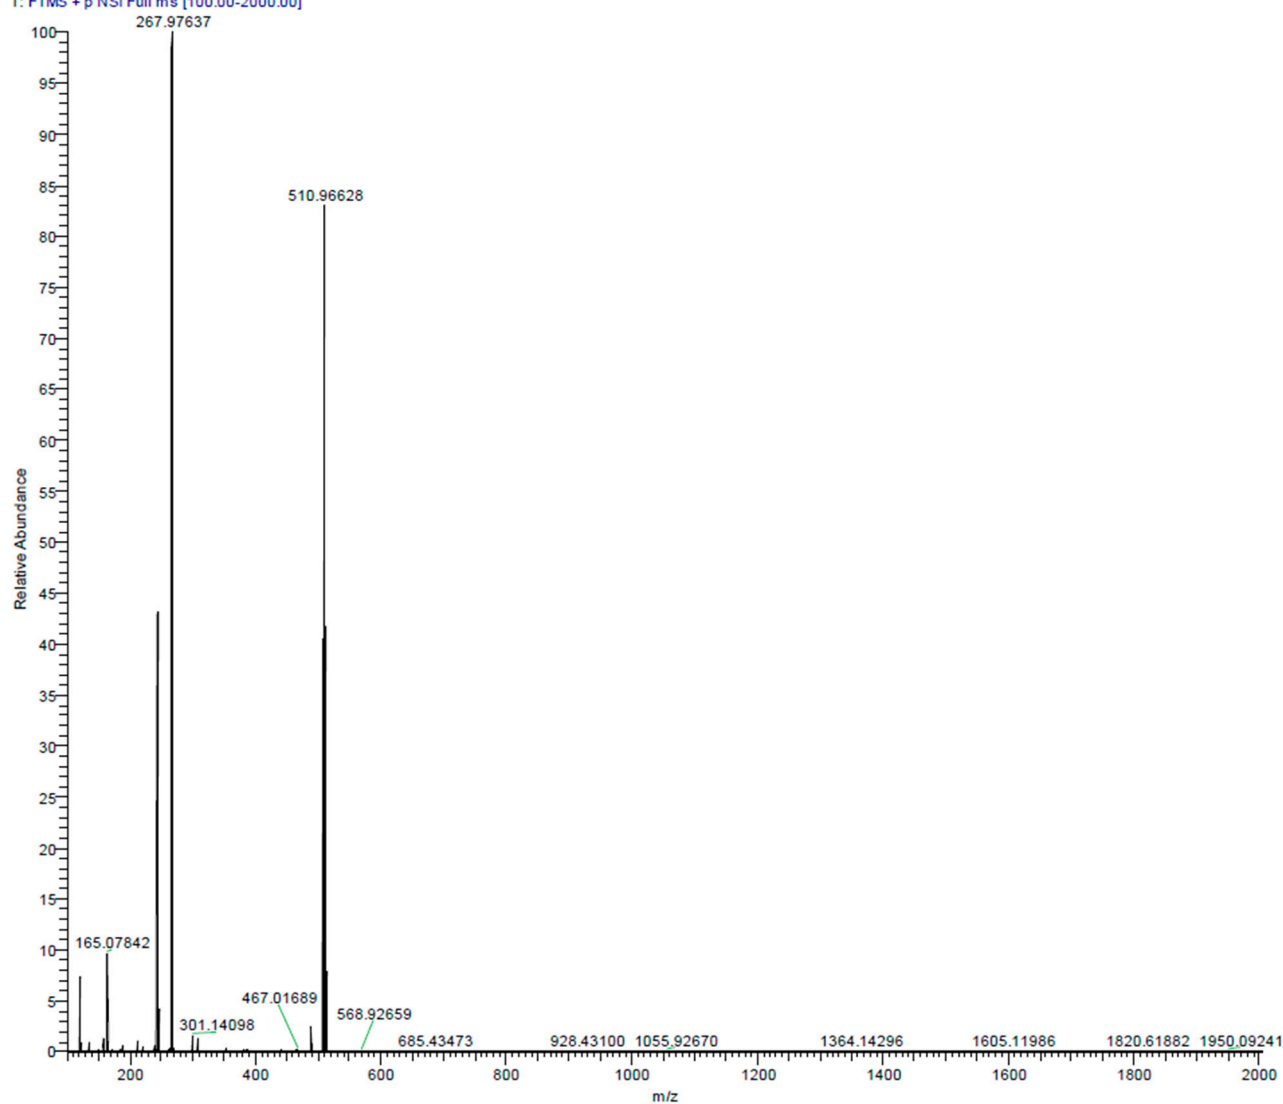

Zoomed spectrum (Top spectrum: measured mass; bottom spectrum: calculated mass)

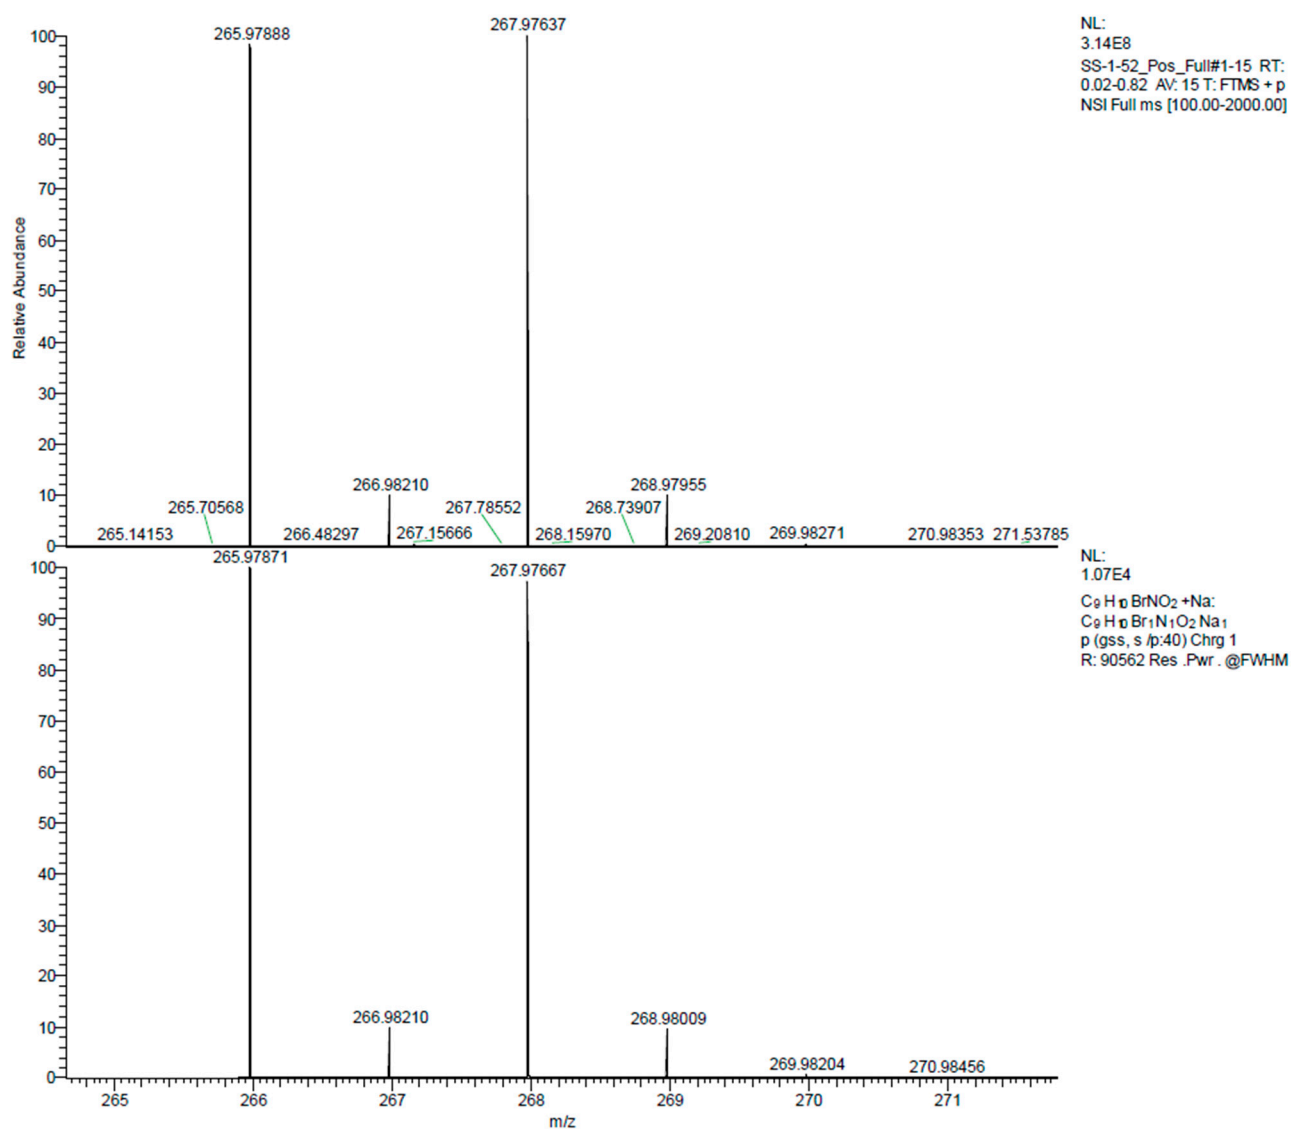

## 2-Bromo-*N*-phenylacetamide (**15b**)

### Full spectrum

SS-1-65\_Pos\_Full #1-12 RT: 0.02-0.67 AV: 12 NL: 5.21E7

T: FTMS + p NSI Full ms [100.00-2000.00]

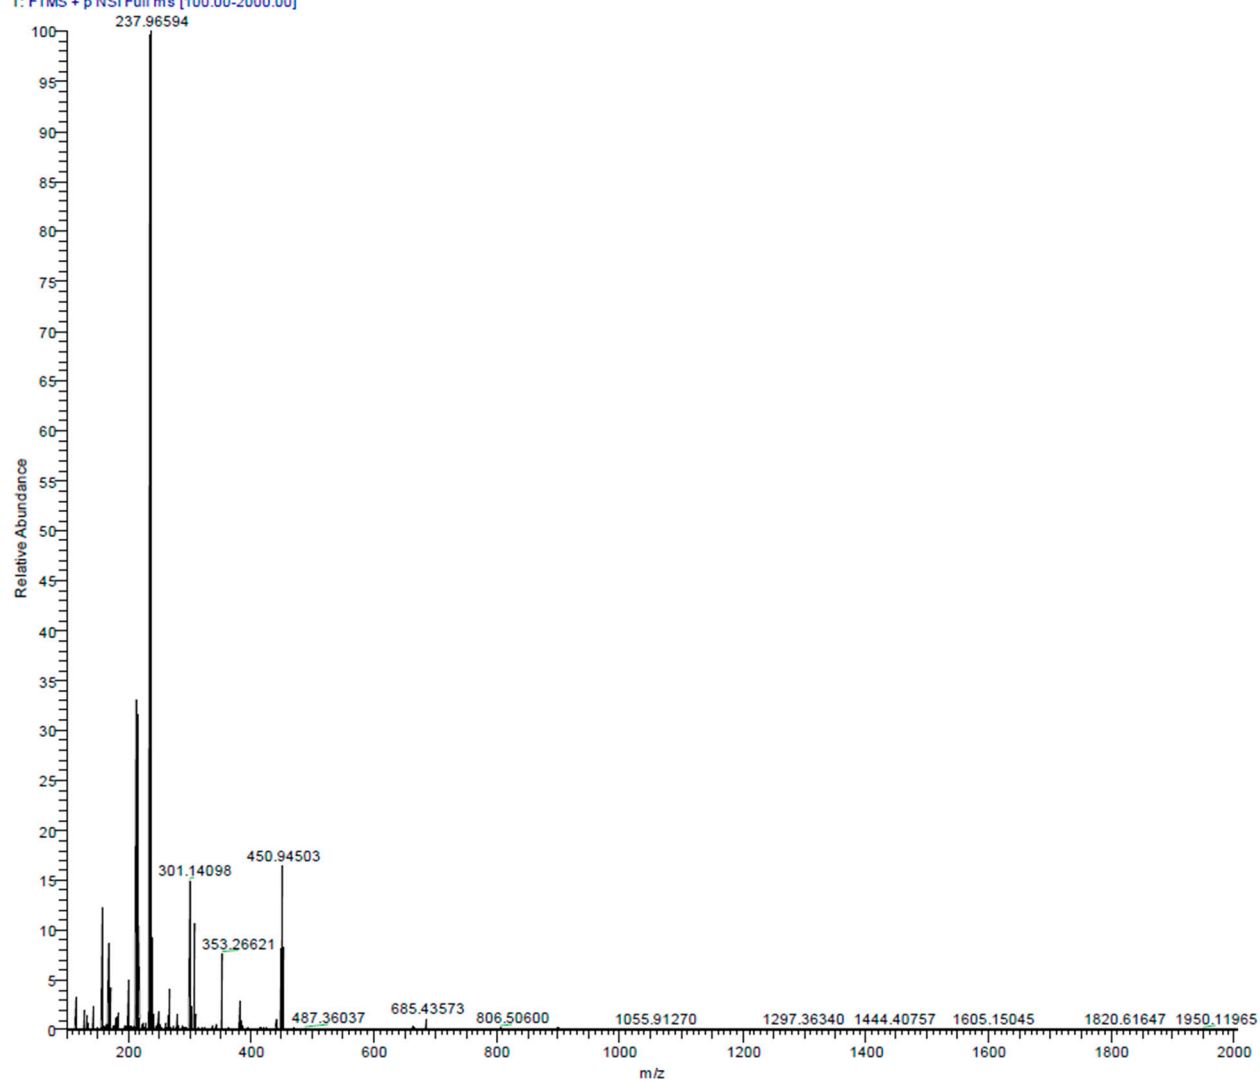

Zoomed spectrum (Top spectrum: measured mass; bottom spectrum: calculated mass)

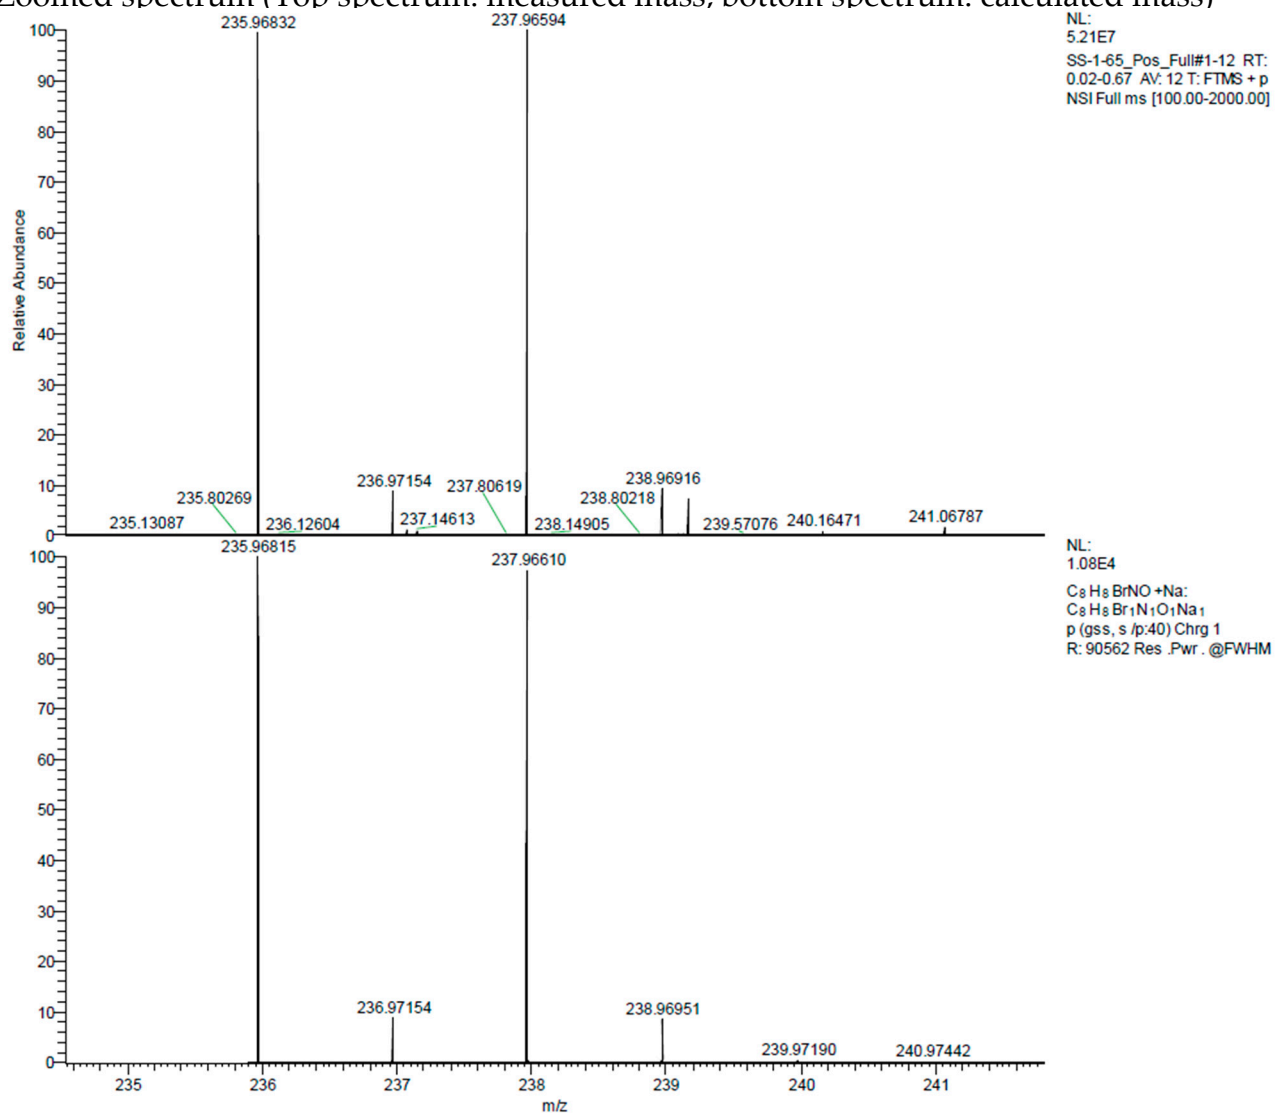

## 2-Bromo-N-(4-nitrophenyl)acetamide (**15c**)

### Full spectrum

SS-1-67\_Pos\_Full #1-11 RT: 0.02-0.61 AV: 11 NL: 2.75E7  
T: FTMS + p NSI Full ms [100.00-2000.00]

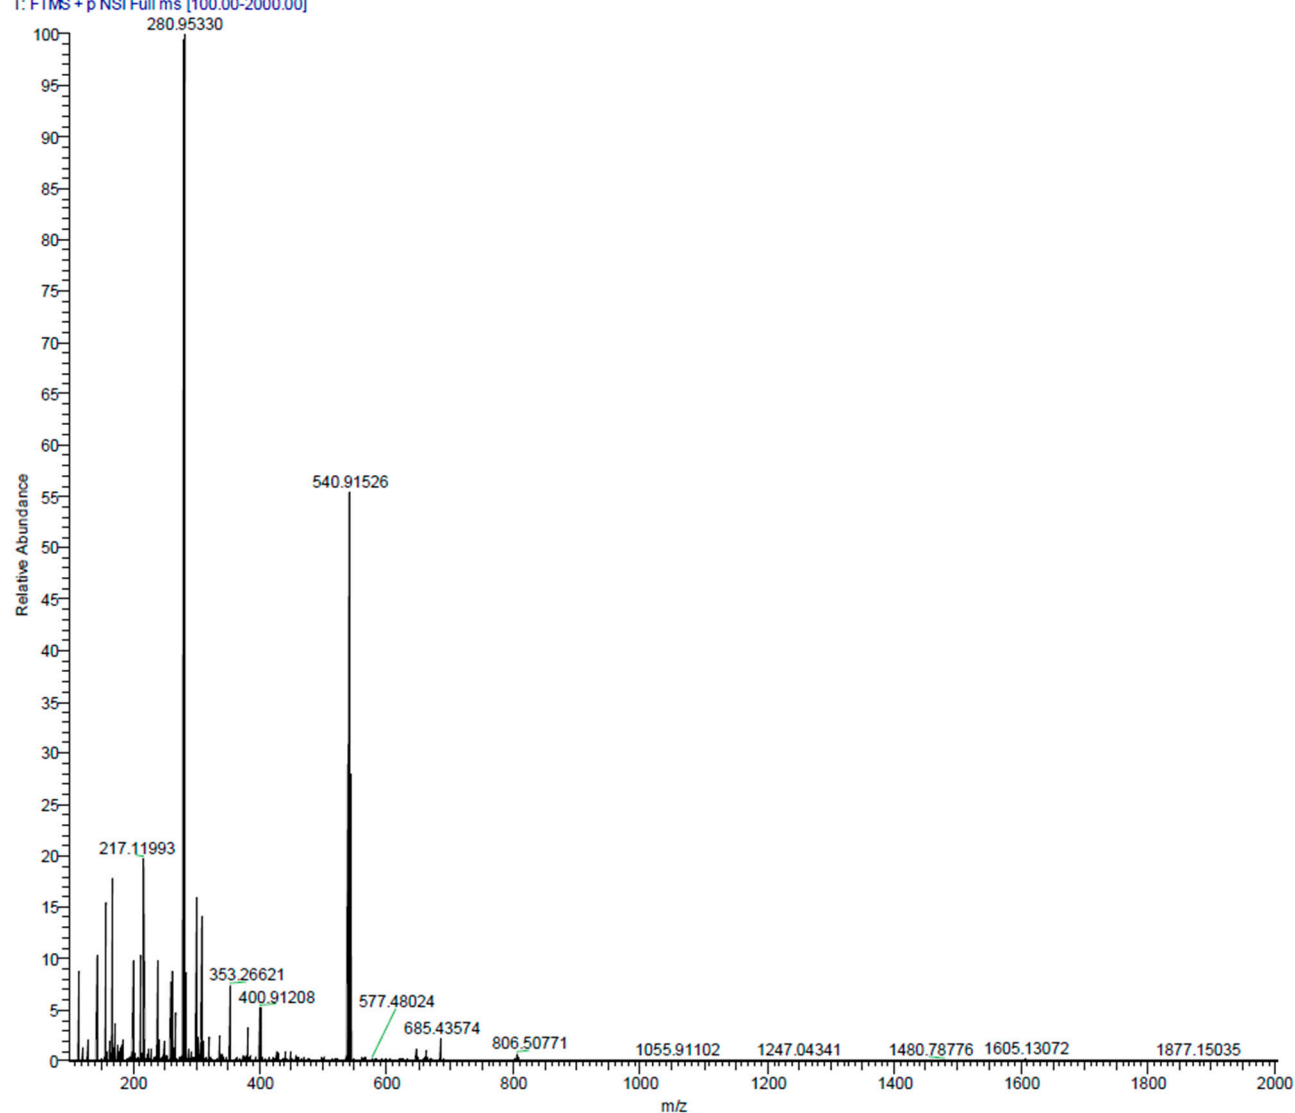

Zoomed spectrum (Top spectrum: measured mass; bottom spectrum: calculated mass)

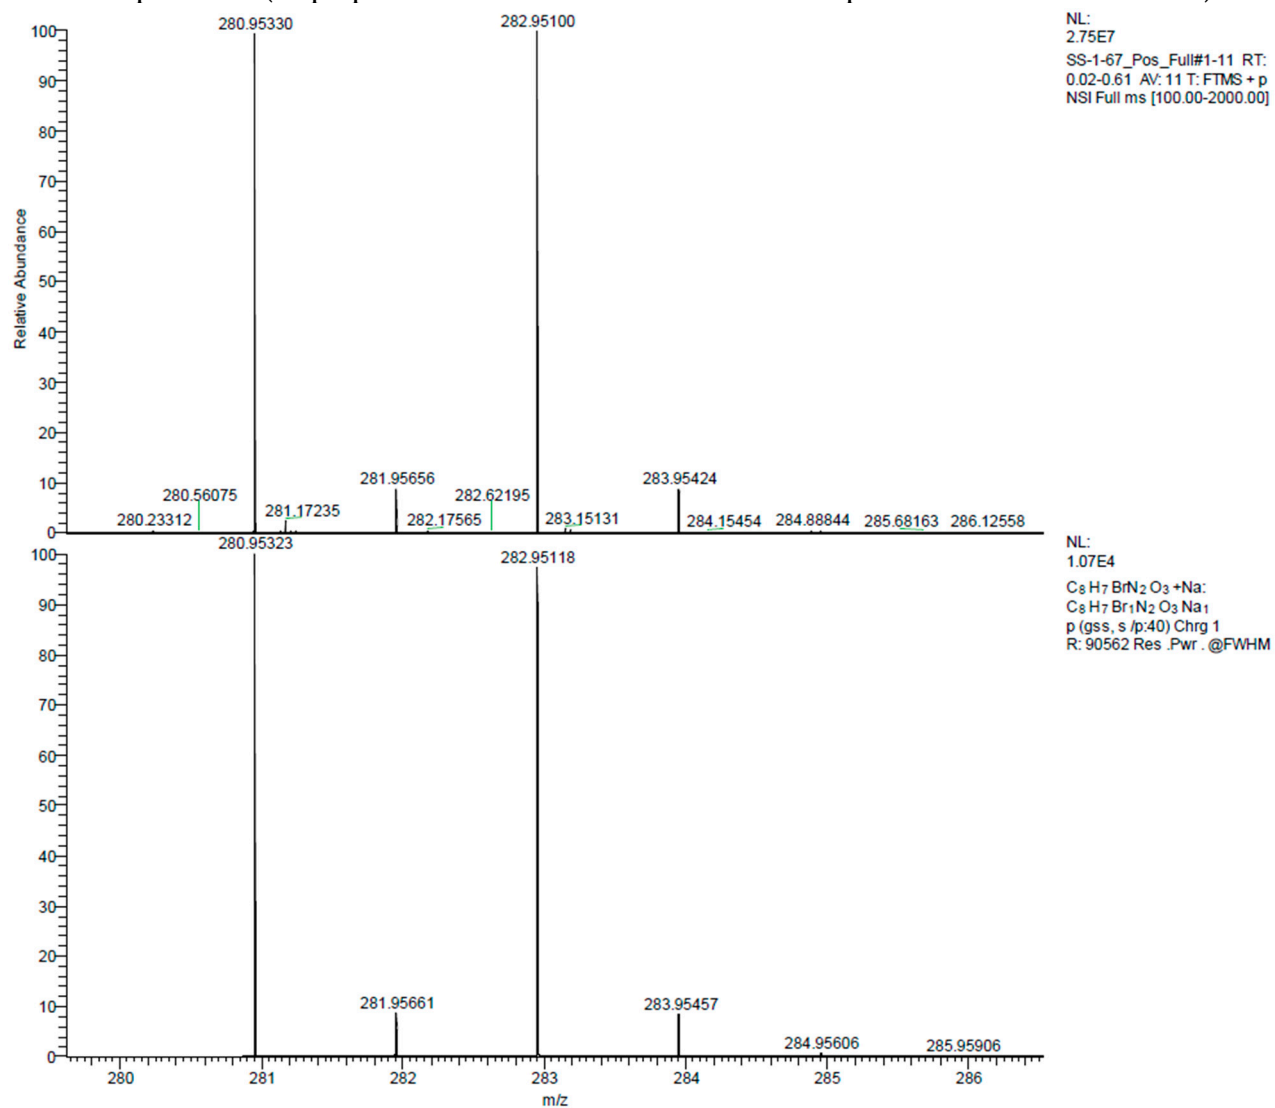

Supplement: s1 [file s1]
